# Supplementary material for: Pesticide reduction: Technical preference and influencing factors of rice farmers in China
Source: Research Square preprint supplement (doi:10.21203/rs.3.rs-1552109/v1), 2022-05-31
Supplement: Supplementary file 1 [file 9319d5616b29fdff6ac28141.xlsx]

## Sheet: 2021农户数据
问卷基本信息								一、基本情况
								（一）被调查者家庭基本情况
								家庭信息						农业劳动力信息
序号	问卷编号	调查员	录入员	省市（县）	乡（镇）村	受访者	电话	家庭总人口	65岁及以上人数	儿童人数	常在家人数	劳动力	从事农业生产人数	家庭成员编码1	性别	年龄	务农年限	是否患慢性疾病	受教育年限	是否国家公职人员/村干部	2020年兼业总时长	兼业地点	家庭成员编码2	性别	年龄	务农年限	是否患慢性疾病	受教育年限	是否国家公职人员/村干部	2020年兼业总时长	兼业地点	家庭成员编码3	性别	年龄	务农年限	是否患慢性疾病	受教育年限	是否国家公职人员/村干部	2020年兼业总时长	兼业地点	家庭成员编码4	性别	年龄	务农年限	是否患慢性疾病	受教育年限	是否国家公职人员/村干部	2020年兼业总时长	兼业地点
1	JS0101	杜三峡	杜三峡	湖北省荆门市京山市	雁门口镇瓦庙村	魏又清		6	0	2	4	3	1	1	1	61	45	0	5	0	0	0
2	JS0102	杜三峡	杜三峡	湖北省荆门市京山市	雁门口镇瓦庙村	陈长清	13872914635	3	0	0	3	2	2	1	1	63	49	0	9	0	0	0	2	2	64	48	0	3	0	0	0
3	JS0103	杜三峡	杜三峡	湖北省荆门市京山市	雁门口镇瓦庙村	周永华	13971842752	3	0	0	2	3	2	1	1	52	35	0	9	0	2	1	2	2	52	35	0	6	0	0	0
4	JS0201	杜三峡	杜三峡	湖北省荆门市京山市	雁门口镇白虎村	邵清峰	15335865870	5	1	0	2	4	2	1	1	65	50	0	12	0	0	0	2	2	62	45	0	3	0	0	0
5	JS0202	杜三峡	杜三峡	湖北省荆门市京山市	雁门口镇白虎村	邹静涛	15872899378	5	2	0	5	4	2	1	1	4	15	0	6	0	0	0	2	2	37	10	0	8	0	0	0
6	JS0301	杜三峡	杜三峡	湖北省荆门市京山市	雁门口镇白虎村	刘德春	15972665716	5	0	0	2	4	2	1	1	64	50	0	9	0	2	1	2	2	64	50	0	1	0	0	0
7	JS0301	杜三峡	杜三峡	湖北省荆门市京山市	雁门口镇中南山村	刘新庆	13597943372	2	0	0	2	2	2	1	1	56	40	0	9	0	0.5	1	2	2	56	40	0	0	0	0	0
8	JS0302	杜三峡	杜三峡	湖北省荆门市京山市	雁门口镇中南山村	叶红波	13477576428	4	0	0	4	3	2	1	1	33	5	0	9	0	7	4																			4	2	50	35	0	0	0	0	0
9	JS0303	杜三峡	杜三峡	湖北省荆门市京山市	雁门口镇中南山村	叶成龙	13593792927	3	0	0	2	3	2	1	1	49	15	0	15	0	0	0	2	2	45	12	0	15	0	0	0
10	JS0304	杜三峡	杜三峡	湖北省荆门市京山市	雁门口镇中南山村	崔跃华	13872917772	6	0	1	4	4	2	1	1	55	20	0	8	0	3	1	2	2	55	20	0	8	0	0	0
11	JS0401	杜三峡	杜三峡	湖北省荆门市京山市	曹武镇顾家场村	陈丙武	13581340286	3	0	0	2	2	2	1	1	55	40	0	9	0	3	1	2	2	53	40	0	9	0	0	0
12	JS0402	杜三峡	杜三峡	湖北省荆门市京山市	曹武镇顾家场村	田彪	13677260735	6	2	0	6	4	2	1	1	43	20	0	9	0	3	2	2	2	33	5	0	9	0	0	0
13	JS0501	杜三峡	杜三峡	湖北省荆门市京山市	曹武镇九房村	皓国权	15872908632	5	1	0	5	1	1	1	1	46	30	0	2	0	1	1
14	JS0502	杜三峡	杜三峡	湖北省荆门市京山市	曹武镇九房村	汪王大	15912668179	5	0	1	3	4	2	1	1	59	30	0	9	0	2	1	2	2	59	30	0	6	0	0	0
15	JS0503	杜三峡	杜三峡	湖北省荆门市京山市	曹武镇九房村	屈涛		6	0	2	6	2	2	1	2	53	25	1	6	0	0	0	2	1	53	25	0	9	1	12	1
16	JS0504	杜三峡	杜三峡	湖北省荆门市京山市	曹武镇九房村	陶爱兰		7	1	1	4	4	2	1	1	60	40	0	9	0	3	2	2	2	60	40	0	9	0	6	2
17	JS0505	杜三峡	杜三峡	湖北省荆门市京山市	曹武镇九房村	廖贵兵	18272467156	5	0	1	3	4	1	1	1	55	30	0	9	0	3	4
18	JS00701	杜三峡	杜三峡	湖北省荆门市京山市	曹武镇民主村	杨平	13593783093	6	2	0	4	4	2	1	1	52	30	0	9	1	2	1	2	2	51	30	0	9	0	0	0
19	JS00702	杜三峡	杜三峡	湖北省荆门市京山市	曹武镇民主村	赵珍艳	13235643735	4	0	0	2	3	2	1	2	54	25	0	3	0	0	0	2	1	56	25	0	5	0	0	0
20	JS00703	杜三峡	杜三峡	湖北省荆门市京山市	曹武镇民主村	王家旭	13451219419	3	1	0	3	2	2	1	1	59	30	0	9	0	0	0	2	2	55	30	0	9	0	0	0
21	JS00704	杜三峡	杜三峡	湖北省荆门市京山市	曹武镇民主村	吴战宗	18872422276	6	0	1	4	3	1	1	1	57	45	0	1	0	2	5
22	JS00801	杜三峡	杜三峡	湖北省荆门市京山市	石龙镇蒲圻村	徐少斌	15972665534	5	2	0	4	3	1	1	1	54	30	0	6	0	0	0
23	JS00802	杜三峡	杜三峡	湖北省荆门市京山市	石龙镇蒲圻村	夏炎祥	13972888821	3	0	0	2	2	2	1	1	58	40	0	9	0	1.5	4	2	2	58	40	0	7	0	0	0
24	JS00803	杜三峡	杜三峡	湖北省荆门市京山市	石龙镇蒲圻村			4	0	0	2	2	2	1	2	50	25	0	9	0	0	0	1	1	53	30	0	9	1	12	1
25	JS00804	杜三峡	杜三峡	湖北省荆门市京山市	石龙镇蒲圻村	罗武	15972683769	4	0	0	2	2	2	1	1	53	30	0	9	1	12	1	2	2	50	30	0	9	0	0	0
26	SY0101	杜三峡	杜三峡	湖北省荆门市沙洋县	五里铺镇陈池村	李元金	13297536598	2	0	0	2	2	2	1	1	59	40	0	9	0	0.5	1	2	2	59	40	0	6	0	0	0
27	SY0102	杜三峡	杜三峡	湖北省荆门市沙洋县	五里铺镇陈池村	解中华	13969966426	5	2	0	3	2	1	1	1	44	20	0	12	0	0	0
28	SY0103	杜三峡	杜三峡	湖北省荆门市沙洋县	五里铺镇陈池村	杨国伟	15972603406	4	1	0	3	2	2	1	1	49	25	0	9	0	6	4	2	2	46	20	0	9	0	6	4
29	SY0104	杜三峡	杜三峡	湖北省荆门市沙洋县	五里铺镇陈池村	罗云金	15872929863	2	2	0	2	2	2	1	1	70	50	0	9	0	0	0	2	2	69	50	0	0	0	0	0
30	SY0105	杜三峡	杜三峡	湖北省荆门市沙洋县	五里铺镇陈池村	石祖国	13593789791	4	1	1	4	3	1	1	1	69	40	0	12	0	0	0
31	XT001	唐林	冯茂岚	湖北省仙桃市	张沟镇中心村	冯爱娇		5	1	1	5	4	2	1	2	59	40	0	9	0	0	0	2	1	59	40	0	9	0	0	0
32	XT001	唐林	冯茂岚	湖北省仙桃市	张沟镇中心村	陈建国		5	1	0	3	3	3	1	2	51	30	0	9	1	0	0
33	XT001	唐林	冯茂岚	湖北省仙桃市	张沟镇中心村	冯琼		4	0	0	2	4	2	1	2	50	30	0	12	1	0	0
34	XT001	唐林	冯茂岚	湖北省仙桃市	张沟镇中心村	冯建华		4	1	0	3	3	2	1	1	57	40	0	9	1	0	0
35	XT002	唐林	冯茂岚	湖北省仙桃市	张沟镇朱坊村	柳末英		6	0	2	3	0	4	1	1	58	40	0	9	0	0	0
36	XT002	唐林	冯茂岚	湖北省仙桃市	张沟镇朱坊村	张铁洲		4	0	0	2	4	2	1	1	59	40	0	9	1	0	0
37	XT003	唐林	冯茂岚	湖北省仙桃市	张沟镇前丰村	罗材玉		5	0	0	2	5	2	1	1	61	45	0	9	0	0	0
38	XT003	唐林	冯茂岚	湖北省仙桃市	张沟镇前丰村	向世年		2	2	0	2	0	2	1	2	80	60	1	6	0	0	0
39	XT003	唐林	冯茂岚	湖北省仙桃市	张沟镇前丰村	陈四林		4	0	0	4	4	2	1	1	58	40	0	12	0	0	0
40	XT001	冯茂岚	冯茂岚	湖北省仙桃市	张沟镇前丰村	唐阳玉	13545941971	7	2	1	2	6	2	1	1	74	45	0	6	0	0	0	2	2	24	45	0	6	0	0	0
41	XT002	冯茂岚	冯茂岚	湖北省仙桃市	张沟镇朱坊村	朱银平	18672862887	4	1	0	3	2	1	1	2	50	25	0	3	0	0	0	2	1	48	23	0	9	0	3	1
42	XT002	冯茂岚	冯茂岚	湖北省仙桃市	张沟镇朱坊村	朱南阶	15629291883	4	2	0	4	3	2	1	1	72	50	0	0	0	0	0	2	2	68	40	0	0	0	0	0
43	XT003	冯茂岚	冯茂岚	湖北省仙桃市	张沟镇前丰村	向德爽	13407272561	4	0	0	2	2	2	1	1	50	15	0	9	0	0	0	2	2	46	15	0	9	0	0	0
44	XT003	冯茂岚	冯茂岚	湖北省仙桃市	张沟镇前丰村	陈光瑞	18771152342	7	2	0	2	4	2	1	1	75	45	0	6	0	0	0	2	2	73	45	0	0	0	0	0
45	XT003	冯茂岚	冯茂岚	湖北省仙桃市	张沟镇前丰村	文昌虎	13545943896	5	0	1	3	4	2	1	1	60	45	1	9	0	3	3	2	2	59	45	1	5	0	0	0
46	XT003	冯茂岚	冯茂岚	湖北省仙桃市	张沟镇前丰村	陈再玉	13312916705	2	0	0	3	2	2	1	1	53	35	1	12	0	2	1	2	2	52	30	1	6	0	0	0
47	XT003	冯茂岚	冯茂岚	湖北省仙桃市	张沟镇前丰村	董小泽	13477483105	5	0	1	2	4	2	1	1	61	45	0	6	0	2	2	2	2	55	35	1	6	0	2	2
48	XT004	冯茂岚	冯茂岚	湖北省仙桃市	彭场镇木兰村	肖那林	15871836670	5	2	1	2	4	2	1	1	78	56	0	9	0	0	0	2	2	77	53	1	0	0	0	0
49	XT005	冯茂岚	冯茂岚	湖北省仙桃市	彭场镇七里村	叶兰英	18727352342	5	0	0	2	4	2	1	2	63	45	0	0	0	0	0	2	1	64	46	0	12	0	0	0
50	XT005	冯茂岚	冯茂岚	湖北省仙桃市	彭场镇七里村	张培福	15871885317	5	1	0	5	4	2	1	1	53	37	0	3	0	4	2	2	2	48	28	0	3	0	4	4
51	XT005	冯茂岚	冯茂岚	湖北省仙桃市	彭场镇七里村	易想琴	15827983226	3	0	0	2	2	2	1	1	53	37	0	9	0	6	0	2	2	48	20	0	6	0	0	0
52	XT005	冯茂岚	冯茂岚	湖北省仙桃市	彭场镇七里村	应还元	18872619671	5	2	0	2	4	2	1	1	67	51	0	6	0	3	1	2	1	66	48	0	6	0	0	0
53	XT005	冯茂岚	冯茂岚	湖北省仙桃市	彭场镇七里村	张子红	13094268134	5	2	0	4	3	2	1	1	54	38	0	9	0	1	3	2	2	52	35	0	6	0	12	3
54	XT005	冯茂岚	冯茂岚	湖北省仙桃市	彭场镇七里村	易军才	15822885640	6	0	1	1	4	1	1	1	60	44	0	12	0	5	5
55	XT005	冯茂岚	冯茂岚	湖北省仙桃市	彭场镇七里村	廖中青	13477518844	9	0	0	2	6	2	1	1	58	42	0	9	0	6	1	2	1	59	40	0	6	0	0	0
56	XT006	冯茂岚	冯茂岚	湖北省仙桃市	毛嘴镇秦杨村	秦功业		2	2	0	2	2	2	1	1	76	60	0	4	0	0	2	2	2	76	60	0	0	0	0	0
57	XT006	冯茂岚	冯茂岚	湖北省仙桃市	毛嘴镇秦杨村	曾详义	15342900203	7	1	1	1	6	1	1	1	77	55	1	6	0	0	0
58	XT006	冯茂岚	冯茂岚	湖北省仙桃市	毛嘴镇秦杨村	秦大虎	15827939859	5	2	0	5	5	2	1	1	71	11	0	9	1	0	0	2	2	70	10	0	6	0	0	0
59	XT006	冯茂岚	冯茂岚	湖北省仙桃市	毛嘴镇秦杨村	秦树洲	13235555652	5	2	0	5	4	2	1	1	64	48	1	9	0	0	0	2	2	63	46	1	6	0	0	0
60	XT006	冯茂岚	冯茂岚	湖北省仙桃市	毛嘴镇秦杨村	秦新军	18986928625	3	0	0	2	2	2	1	1	49	4	0	9	1	12	1	2	2	49	4	0	9	0	0	0
61	XT006	冯茂岚	冯茂岚	湖北省仙桃市	毛嘴镇秦杨村	段军唐	13329750275	8	2	2	8	6	6	1	1	47	20	0	9	1	0	0	2	2	47	20	0	8	0	7	0
62	XT006	冯茂岚	冯茂岚	湖北省仙桃市	毛嘴镇秦杨村	秦国明	18372873839	5	2	0	3	2	2	1	1	70	54	0	6	0	6	1	2	2	70	54	0	6	0	6	1
63	QJ007	冯茂岚	冯茂岚	湖北省潜江市	老新镇三桥村	马友经		6	2	0	2	6	2	1	1	75	30	0	9	0	0	0	2	2	75	50	0	0	0	0	0
64	QJ007	冯茂岚	冯茂岚	湖北省潜江市	老新镇三桥村	张腊姣		6	0	2	4	4	2	1	2	56	35	1	0	0	0	0	2	1	55	35	1	6	0	0	0
65	QJ007	冯茂岚	冯茂岚	湖北省潜江市	老新镇三桥村	杨圣耀		6	2	0	2	4	2	1	1	70	55	1	9	0	0	0	2	2	70	55	1	0	0	0	0
66	QJ007	冯茂岚	冯茂岚	湖北省潜江市	老新镇三桥村	杨华伦		6	0	2	4	4	2	1	1	58	42	0	9	0	0	0	2	2	56	40	0	6	0	0	0
67	QJ007	冯茂岚	冯茂岚	湖北省潜江市	老新镇三桥村	杨菜洪	13114336829	6	2	1	2	5	2	1	1	75	60	1	6	0	0	0	2	2	73	57	1	0	0	0	0
68	QJ008	冯茂岚	冯茂岚	湖北省潜江市	老新镇赤生村	王厚波	15271201041	5	1	1	5	4	3	1	1	39	10	0	9	0	0	0	2	2	32	10	0	6	0	0	0
69	QJ008	冯茂岚	冯茂岚	湖北省潜江市	老新镇赤生村	张圆林	13407281336	6	0	1	4	4	2	1	1	59	40	0	12	1	12	1	2	2	61	40	0	6	0	0	0
70	QJ008	冯茂岚	冯茂岚	湖北省潜江市	老新镇赤生村	付义明	13593946009	5	0	1	5	4	2	1	1	60	40	0	9	0	0	0	2	2	60	40	0	5	0	0	0
71	QJ009	冯茂岚	冯茂岚	湖北省潜江市	老新镇沱口村	肖开银	13400898056	4	2	0	3	3	2	1	1	65	40	1	12	0	0	0	2	2	64	28	1	0	0	0	0
72	QJ009	冯茂岚	冯茂岚	湖北省潜江市	老新镇沱口村	肖开丙	13593947760	6	2	0	3	4	2	1	1	70	50	1	6	0	0	0	2	2	70	50	0	0	0	0	0
73	QJ009	冯茂岚	冯茂岚	湖北省潜江市	老新镇沱口村	肖开华	13593909757	3	2	0	2	3	2	1	1	65	48	0	12	0	0	0	2	2	64	47	0	0	0	0	0
74	QJ009	冯茂岚	冯茂岚	湖北省潜江市	老新镇沱口村	杨华锦	13042840008	3	0	0	1	3	1	1	1	46	13	1	7	1	0	0
75	QJ009	冯茂岚	冯茂岚	湖北省潜江市	老新镇沱口村	肖开紫	13687232096	3	0	0	2	2	2	1	1	51	28	0	9	0	0	0	2	2	49	28	1	6	0	0	0
76	QJ009	冯茂岚	冯茂岚	湖北省潜江市	老新镇沱口村	华壮远	15871895318	4	2	0	4	4	1	1	1	62	30	0	12	1	12	1
77	QJ011	冯茂岚	冯茂岚	湖北省潜江市	积玉口镇积玉村	张国秀		4	0	0	4	3	2	1	2	63	46	1	0	0	0	0	2	1	64	46	1	8	0	0	0
78	QJ011	冯茂岚	冯茂岚	湖北省潜江市	积玉口镇积玉村	李德民	17671663668	5	0	1	5	5	2	1	2	56	38	0	0	0	0	0	2	1	56	38	0	0	0	0	0
79	QJ011	冯茂岚	冯茂岚	湖北省潜江市	积玉口镇积玉村	张龙任	15572835518	7	1	0	4	4	2	1	1	51	31	0	9	0	2	5	2	2	50	30	1	9	0	0	0
80	QJ011	冯茂岚	冯茂岚	湖北省潜江市	积玉口镇积玉村	张勇	13349713422	6	0	1	6	4	3	1	1	31	10	0	14	1	12	1	2	2	56	34	0	6	0	0	0
81	XT003	余威震	冯茂岚	湖北省仙桃市	张沟镇前丰村	张井堂	13597406634	2	0	0	2	1	1	1	1	58	38	0	5	0	0	0
82	XT003	余威震	冯茂岚	湖北省仙桃市	张沟镇前丰村	文菊作	13396019763	4	0	0	1	4	1	1	1	56	46	0	9	0	3	3
83	XT003	余威震	冯茂岚	湖北省仙桃市	张沟镇前丰村	陈从容	13972170013	4	1	0	3	3	2	1	1	52	32	0	9	0	2	1	2	2	50	30	0	5	0	0	0
84	XT003	余威震	冯茂岚	湖北省仙桃市	张沟镇前丰村	陈从丙	17707274331	6	2	2	6	4	3	1	1	41	20	0	9	0	0	0	5	1	68	48	0	12	0	0	0
85	XT003	余威震	冯茂岚	湖北省仙桃市	张沟镇前丰村	李金秀	15327467765	6	2	2	2	4	2	1	2	67	47	1	0	0	0	0	2	1	71	51	1	5	0	0	0
86	XT002	余威震	冯茂岚	湖北省仙桃市	张沟镇朱坊村	朱爱成	15271197589	5	2	1	2	4	2	1	1	70	50	0	2	0	0	0	2	2	71	51	0	0	0	0	0
87	XT002	余威震	冯茂岚	湖北省仙桃市	张沟镇朱坊村	柳鹏程	13035378856	7	2	2	1	4	1	1	1	72	52	1	6	0	0	0
88	XT001	余威震	冯茂岚	湖北省仙桃市	张沟镇中心村	张德发	13329753155	3	0	0	2	3	1	1	1	62	42	1	5	0	1	3
89	XT001	余威震	冯茂岚	湖北省仙桃市	张沟镇中心村	吕翠芝	13329740806	4	1	1	3	3	2	1	2	55	35	0	6	0	0	0	2	1	57	37	0	9	1	12	0
90	QJ007	余威震	冯茂岚	湖北省潜江市	老新镇三桥村	熊家荣	13593949898	5	1	0	1	4	1	1	1	55	35	0	12	1	12	1
91	QJ007	余威震	冯茂岚	湖北省潜江市	老新镇三桥村	杨华清	15271207913	6	2	0	5	4	2	1	1	43	5	0	12	0	0	0	2	2	43	5	0	9	0	0	0
92	QJ007	余威震	冯茂岚	湖北省潜江市	老新镇三桥村	马友营		5	2	0	2	5	2	1	1	75	55	0	6	0	0	0	2	2	74	54	0	6	0	0	0
93	QJ007	余威震	冯茂岚	湖北省潜江市	老新镇三桥村	马友义		1	1	1	1	1	1	1	1	70	50	0	6	0	0	0
94	XT006	余威震	冯茂岚	湖北省仙桃市	毛嘴镇秦杨村	秦喜平	13407293808	6	1	0	3	4	2	1	1	54	35	0	0	0	4	1	2	2	54	34	1	0	0	0	0
95	XT006	余威震	冯茂岚	湖北省仙桃市	毛嘴镇秦杨村	邓社平	13477485263	4	0	0	2	4	2	1	1	54	34	0	5	0	4	3	2	2	53	34	0	5	0	0	0
96	XT006	余威震	冯茂岚	湖北省仙桃市	毛嘴镇秦杨村	蒋龙华		9	2	0	6	6	2	1	1	69	49	0	0	0	1	1	2	2	67	47	1	0	0	0	0
97	XT006	余威震	冯茂岚	湖北省仙桃市	毛嘴镇秦杨村	徐四海	18972947122	6	0	1	2	4	2	1	1	56	36	0	6	0	0	0	2	2	55	35	1	6	0	0	0
98	XT006	余威震	冯茂岚	湖北省仙桃市	毛嘴镇秦杨村	秦明廷	13599450363	3	0	0	2	3	2	1	1	53	33	0	12	0	0	0	2	2	53	33	0	9	0	12	0
99	XT006	余威震	冯茂岚	湖北省仙桃市	毛嘴镇秦杨村	秦福林		4	0	0	2	4	2	1	1	58	38	1	9	0	0	0	2	2	58	38	0	9	0	4	1
100	XT004	余威震	冯茂岚	湖北省仙桃市	彭场镇木兰村	颜爱军	13647288793	3	0	0	2	2	2	1	1	48	28	0	9	0	4	3	2	2	44	24	0	6	0	4	3
101	XT004	余威震	冯茂岚	湖北省仙桃市	彭场镇木兰村	颜宝堂	13429999775	6	0	1	1	5	1	1	1	55	35	0	9	0	2	1
102	XT005	余威震	冯茂岚	湖北省仙桃市	彭场镇七里村	李德明	18771171866	2	2	0	2	2	2	1	1	70	50	1	9	0	0	0	2	2	70	50	1	0	0	0	0
103	XT005	余威震	冯茂岚	湖北省仙桃市	彭场镇七里村	彭重阳		1	1	0	1	1	1	1	1	75	55	1	5	0	0	0
104	XT005	余威震	冯茂岚	湖北省仙桃市	彭场镇七里村	易小山	13597450343	5	2	0	2	4	2	1	1	72	52	0	6	0	0	0	2	2	72	52	1	0	0	0	0
105	XT005	余威震	冯茂岚	湖北省仙桃市	彭场镇七里村	张冬山	18727312759	2	0	1	2	2	2	1	1	59	39	1	9	0	2	1	2	2	58	38	1	6	0	1	1
106	XT005	余威震	冯茂岚	湖北省仙桃市	彭场镇七里村	戈先木	15926078020	5	1	2	1	3	1	1	1	73	53	1	5	0	0	0
107	XT003	唐林	冯茂岚	湖北省仙桃市	张沟镇前丰村	陈宝国		7	2	2	4	3	2	1	1	65	40	0	6	0	0	0	2	2	65	40	0	0	0	0	0
108	XT003	唐林	冯茂岚	湖北省仙桃市	张沟镇前丰村	陈雄辉		6	0	1	2	4	2	1	1	60	40	0	9	0	0	0
109	XT003	唐林	冯茂岚	湖北省仙桃市	张沟镇前丰村	陈金华		5	0	0	2	5	2	1	1	59	40	0	11	0	0	0
110	XT004	唐林	冯茂岚	湖北省仙桃市	彭场镇木兰村	颜良全		2	2	0	2	0	2	1	1	71	50	1	6	0	0	0
111	XT004	唐林	冯茂岚	湖北省仙桃市	彭场镇木兰村	张新娇		1	0	0	1	1	1	1	1	50	30	0	6	0	0	0
112	XT005	唐林	冯茂岚	湖北省仙桃市	彭场镇七里村	戈红远	15826934854	5	0	1	2		2	1	1	52	30	0	9	1	0	0
113	XT005	唐林	冯茂岚	湖北省仙桃市	彭场镇七里村	赵贤兵		1	1	0	1	0	1	1	1	71	55	1	6	0	0	0
114	QJ014	唐林	冯茂岚	湖北省潜江市	浩口镇观音村	罗地灵		3	0	0	2	3	1	1	1	50	20	0	9	0	0	0
115	QJ014	唐林	冯茂岚	湖北省潜江市	浩口镇观音村	余书龙		6	2	1	4	2	2	1	1	68	40	0	12	0	0	0
116	QJ013	唐林	冯茂岚	湖北省潜江市	浩口镇莲子垸村	刘星梅		6	2	0	6	2	2	2	2	51	10	0	12	1	12	1
117	QJ013	唐林	冯茂岚	湖北省潜江市	浩口镇莲子垸村	钟璐		5	2	0	3	2	2	1	1	39	15	0	16	0	0	0
118	QJ012	唐林	冯茂岚	湖北省潜江市	积玉口镇直属村	周中丰		3	0	0	1	3	1	1	1	44	20	0	16	1	12	1
119	QJ012	唐林	冯茂岚	湖北省潜江市	积玉口镇直属村	郑培兵		5	0	1	3	4	2	1	1	58	35	0	9	0	0	0
120	QJ012	唐林	冯茂岚	湖北省潜江市	积玉口镇直属村	郑培文		9	2	2	4	4	2	1	1	54	30	0	6	0	0	0
121	QJ012	唐林	冯茂岚	湖北省潜江市	积玉口镇直属村	周传忠		4	0	0	2	4	2	1	1	58	35	0	12	0	0	0
122	QJ012	唐林	冯茂岚	湖北省潜江市	积玉口镇直属村	杨洪		5	2	0	4	3	2	1	1	45	20	0	9	0	0	0
123	QJ011	唐林	冯茂岚	湖北省潜江市	积玉口镇积玉村	刘楚圆		4	0	0	2	4	2	1	1	58	40	0	6	0	0	0
124	QJ011	唐林	冯茂岚	湖北省潜江市	积玉口镇积玉村	江金华		4	1	0	4	2	2	1	1	43	20	0	9	0	0	0
125	QJ011	唐林	冯茂岚	湖北省潜江市	积玉口镇积玉村	李林峰		4	1	0	4	3	3	1	1	44	20	0	16	1	12	1
126	QJ011	唐林	冯茂岚	湖北省潜江市	积玉口镇积玉村	李德汉		7	2	1	4	3	2	1	1	71	50	0	9	0	0	0
127	QJ014	冯茂岚	冯茂岚	湖北省潜江市	浩口镇观音村	张克礼		6	2	0	4	4	2	1	1	75	5	0	6	0	0	0	2	2	70	50	0	6	0	0	0
128	QJ014	冯茂岚	冯茂岚	湖北省潜江市	浩口镇观音村	朱双喜	13451132478	5	0	0	5	4	4	1	1	45	26	0	9	0	0	0	2	2	38	24	0	9	0	4	1
129	QJ013	冯茂岚	冯茂岚	湖北省潜江市	浩口镇莲子垸村	李加心	13477478366	6	0	1	3	4	2	1	1	62	40	1	12	1	12	1	2	2	60	38	0	7	0	0	0
130	QJ012	冯茂岚	冯茂岚	湖北省潜江市	积玉口镇直属村	张仁权	13451135689	8	2	1	8	6	3	1	1	53	18	0	7	1	12	1
131	QJ012	冯茂岚	冯茂岚	湖北省潜江市	积玉口镇直属村	黄云宣	13265191835	5	1	0	2	5	2	1	1	48	1	0	2	0	0	0
132	QJ012	冯茂岚	冯茂岚	湖北省潜江市	积玉口镇直属村	郑均汝	13477534863	6	2	0	4	4	1	1	1	67	50	0	6	0	0	0
133	QJ012	冯茂岚	冯茂岚	湖北省潜江市	积玉口镇直属村	郑培元	15342926291	5	2	0	3	4	2	1	1	67	40	0	4	0	0	0	2	2	67	40	0	4	0	0	0
134		余威震	冯茂岚	湖北省仙桃市	彭场镇三江村	汪想娇		1	0	0	1	1	1	1	2	58	13	0	0	0	0	0
135		余威震	冯茂岚	湖北省仙桃市	彭场镇三江村	王文仿		6	0	0	2	5	1	1	1	58	38	0	12	1	6	3
136		余威震	冯茂岚	湖北省仙桃市	彭场镇港河村	许丙才		3	0	0		3	2	1	1	59	39	0	12	1	12	1
137		冯茂岚	冯茂岚	湖北省仙桃市	张沟镇联合村	朱德友	15171565739	2	1	0	2	1	1	1	1	81	65	1	15	0	3	0
138		冯茂岚	冯茂岚	湖北省仙桃市	彭场镇许湾村	邓小英	13339702205	2	0	0	2	2	2	1	2	60	44	0	0	0	10	1	2	1	63	48	0	6	0	5	1
139		冯茂岚	冯茂岚	湖北省仙桃市	彭场镇许湾村	李昌群	13047640338	5	2	1	3	4	2	1	1	51	31	0	9	0	1	1	2	2	49	29	0	6	0	0	0
140		冯茂岚	冯茂岚	湖北省仙桃市	彭场镇许湾村	彭秋仿	15727281697	6	2	0	2	6	2	1	1	74	50	0	9	0	2	1	2	2	73	50	0	6	0	12	1
141		余威震	冯茂岚	湖北省仙桃市	彭场镇金剅村	郭德庭		3	1	1	3	3	2	1	2	52	32	0	9	0	3	1	2	1	55	35	0	9	0	3	1
142	JL01	尤云舒鸿	胡瑞华	湖北省荆州市监利市	网市镇北口村	陈世春		8	2	0	2	5	2	1	1	73	55	0	0	0	0	0	2	2	68	50	0	9	0	0	0
143	JL01	尤云舒鸿	胡瑞华	湖北省荆州市监利市	网市镇北口村	董其良		12	2	0	2	6	3	1	1	68	50	0	9	0	0	0	3	1	40	3	0	9	0	12	5	5	1	30	3	0	9	0	12	5
144	JL01	尤云舒鸿	胡瑞华	湖北省荆州市监利市	网市镇北口村	陈义清		3	2	0	2	2	2	1	2	66	15	0	9	0	0	0	2	2	67	15	0	9	0	0	0
145	JL01	尤云舒鸿	胡瑞华	湖北省荆州市监利市	网市镇北口村	陈义平		6	2	1	2	4	2	1	1	67	54	0	4	1	0	0	2	2	67	54	0	0	0	0	0
146	JL01	尤云舒鸿	胡瑞华	湖北省荆州市监利市	网市镇北口村	陈启强		3	0	0	2	2	1	1	1	64	42	0	9	0	0	0
147	JL02	尤云舒鸿	胡瑞华	湖北省荆州市监利市	网市镇万佛寺村	谢均平		6	2	2	4	3	2	1	1	68	42	0	4	0	0	0	2	2	66	40	0	9	0	0	0	5	2	39	8	0	9	0	12	5
148	JL02	尤云舒鸿	胡瑞华	湖北省荆州市监利市	网市镇万佛寺村	吴方华		15	2	0	5	6	1	1	1	78	50	0	4	0	0	0
149	JL02	尤云舒鸿	胡瑞华	湖北省荆州市监利市	网市镇万佛寺村	汤洪祥		6	0	2	2	3	2	1	1	68	40	0	6	0	0	0
150	JL02	尤云舒鸿	胡瑞华	湖北省荆州市监利市	网市镇万佛寺村	陈先生		4	0	0	2	1	1	1	1	50	35	0	9	0	0	0
151	JL02	尤云舒鸿	胡瑞华	湖北省荆州市监利市	网市镇万佛寺村	陈绪亲		5	2	0	5	2	2	1	1	45	25	0	9	0	0	0	2	2	36	13	0	6	0	0	0
152	JL04	尤云舒鸿	胡瑞华	湖北省荆州市监利市	毛市镇老河村	刘女士		6	0	1	4	3	1	1	2	52	25	0	0	0	2	1
153	JL04	尤云舒鸿	胡瑞华	湖北省荆州市监利市	毛市镇老河村	张女士		7	2	2	6	3	2	1	2	60	15	0	0	0	0	0
154	JL04	尤云舒鸿	胡瑞华	湖北省荆州市监利市	毛市镇老河村	冉幼芹		6	2	0	4	2	1	1	1	70	40	0	6	0	0	0
155	JL04	尤云舒鸿	胡瑞华	湖北省荆州市监利市	毛市镇老河村	冉新高		7	1	2	7	4	1	1	1	56	30	0	1	0	2	1
156	JL04	尤云舒鸿	胡瑞华	湖北省荆州市监利市	毛市镇老河村	黄明礼		5	0	1	3	4	2	1	1	55	30	0	9	0	0	0	2	2	55	25	0	9	0	0	0
157	JL05	尤云舒鸿	胡瑞华	湖北省荆州市监利市	毛市镇杨湾村	曹先生		11	2	2	11	6	2	1	1	69	50	0	9	0	0	0	3	1	47	3	0	9	0	9	3
158	JL05	尤云舒鸿	胡瑞华	湖北省荆州市监利市	毛市镇杨湾村	杨先生		9	0	1	9	0	1	1	1	60	30	0	6	0	0	0
159	JL05	尤云舒鸿	胡瑞华	湖北省荆州市监利市	毛市镇杨湾村	曹先生		5	2	1	3	3	1	1	1	70	50	0	0	0	0	0
160	JL05	尤云舒鸿	胡瑞华	湖北省荆州市监利市	毛市镇杨湾村	冉先生		8	0	2	4	4	1	1	1	55	30	0	9	0	0	0
161	JL05	尤云舒鸿	胡瑞华	湖北省荆州市监利市	毛市镇杨湾村	冉先生		5	0	0	2	4	2	1	1	64	30	0	12	0	6	1	2	2	64	30	0	0	0	0	0
162	SS01	尤云舒鸿	胡瑞华	湖北省荆州市石首市	高基庙镇津南村	张先生		5	2	0	4	3	1	1	1	67	30	0	6	0	0	0
163	SS01	尤云舒鸿	胡瑞华	湖北省荆州市石首市	高基庙镇津南村	董先生		5	2	1	3	4	2	1	1	66	40	0	9	0	0	0	2	2	65	30	0	9	0	0	0
164	SS01	尤云舒鸿	胡瑞华	湖北省荆州市石首市	高基庙镇津南村									1	1	55	30	0	9	0	0	0
165	SS02	尤云舒鸿	胡瑞华	湖北省荆州市石首市	高基庙镇百子庵村	周先生		7	2	0	3	5	2	1	1	73	50	0	6	0	0	0	3	1	51	2	0	9	0	12	1
166	SS02	黄炎忠	胡瑞华	湖北省荆州市石首市	高基庙镇百子庵村	王云柯		6	2	1	2	1	1	1	1	78	58	1	16	0	0	0
167	SS02	黄炎忠	胡瑞华	湖北省荆州市石首市	高基庙镇百子庵村	刘少新		3	0	0	2	2	1	1	1	40	20	0	12	0	1	1
168	SS02	黄炎忠	胡瑞华	湖北省荆州市石首市	高基庙镇百子庵村	涂海银		4	0	0	2	4	1	1	1	58	38	0	9	0	3	3
169	SS01	黄炎忠	胡瑞华	湖北省荆州市石首市	高基庙镇津南村	刘天军		2	0	0	2	2	1	1	1	45	5	0	9	0	2	1
170	SS01	黄炎忠	胡瑞华	湖北省荆州市石首市	高基庙镇津南村	严奉香		5	2	0	3	1	1	1	1	70	50	0	6	0	0	0
171	SS01	黄炎忠	胡瑞华	湖北省荆州市石首市	高基庙镇津南村	刘五杰		8	2	2	3	4	1	1	1	65	45	0	9	0	12	1
172	SS01	黄炎忠	胡瑞华	湖北省荆州市石首市	高基庙镇津南村	吴师海		6	1	2	1	4	1	1	1	65	45	1	9	0	0	0
173	SS03	黄炎忠	胡瑞华	湖北省荆州市石首市	团山寺镇过脉岭村	赵国新		4	0	0	4	1	1	1	1	59	0	1	6	0	0	0
174	SS03	黄炎忠	胡瑞华	湖北省荆州市石首市	团山寺镇曹家场村	郑光彩		2	2	0	2	1	1	1	1	69	6	0	0	0	0	0
175	SS05	黄炎忠	胡瑞华	湖北省荆州市石首市	团山寺镇过脉岭村	苏述发		4	0	0	3	2	1	1	1	49	29	0	9	1	12	1
176	JL01	杨健	胡瑞华	湖北省荆州市监利市	网市镇北口村	陈义孝		10	2	0	2	2	2	1	1	68	50	0	6	0	0	0	2	2	66	46	1	6	0	0	0
177	JL01	杨健	胡瑞华	湖北省荆州市监利市	网市镇北口村	贾得新		6	0	0	2	2	2	1	1	61	40	1	12	0	2	1	2	2	61	40	0	0	0	0	0
178	JL01	杨健	胡瑞华	湖北省荆州市监利市	网市镇北口村	鄢来爽	13797386093	6	2	0	4	2	2	1	1	68	50	0	12	0	0	0	2	2	65	50	1	6	0	0	0
179	JL02	杨健	胡瑞华	湖北省荆州市监利市	网市镇万佛寺村	伍南章	13307219255	11	1	0	2	2	1	1	1	70	50	1	6	0	0	0
180	JL02	杨健	胡瑞华	湖北省荆州市监利市	网市镇万佛寺村	陈绪光	13872285974	6	0	2	2	2	2	1	1	58	10	1	12	0	0	0	2	2	57	10	0	9	0	0	0
181	JL02	杨健	胡瑞华	湖北省荆州市监利市	网市镇万佛寺村	李顺贵	13997629326	6	2	0	2	2	2	1	1	70	50	1	6	0	0	0	2	2	70	50	0	0	0	0	0
182	JL02	杨健	胡瑞华	湖北省荆州市监利市	网市镇万佛寺村	李右武	13872276396	6	2	0	2	2	2	1	1	75	10	1	0	0	0	0	2	2	76	10	0	0	0	0	0
183	JL02	杨健	胡瑞华	湖北省荆州市监利市	网市镇万佛寺村	黄云志	15090833582	9	2	0	2	2	2	1	1	70	50	0	6	0	0	0	2	2	72	52	0	0	0	0	0
184	JL03	杨健	胡瑞华	湖北省荆州市监利市	毛市镇崔吴村	李国华	15272428837	9	0	1	2	2	2	1	1	62	40	0	6	0	0	0	2	2	62	40	0	0	0	0	0
185	JL03	杨健	胡瑞华	湖北省荆州市监利市	毛市镇崔吴村	冉幼芹	15927851696	6	2	0	2	2	2	1	1	65	40	1	6	0	12	1	2	2	65	40	1	0	0	0	0
186	JL03	杨健	胡瑞华	湖北省荆州市监利市	毛市镇崔吴村	蔡小南	18772685607	3	2	2	0	2	2	1	2	70	50	0	6	0	0	0	2	1	69	50	0	6	0	0	0
187	JL03	杨健	胡瑞华	湖北省荆州市监利市	毛市镇崔吴村	冉幼文	15957815957	4	2	2	0	2	2	1	2	71	51	0	0	0	0	0	2	2	1	69	0	9	0	0	0
188	JL03	杨健	胡瑞华	湖北省荆州市监利市	毛市镇崔吴村	吴为群		4	1	0	3	3	1	1	1	41	3	0	16	0	0	0
189	JL05	杨健	胡瑞华	湖北省荆州市监利市	毛市镇崔吴村	冉幼林	15971594519	6	2	0	0	2	2	1	1	65	40	1	6	0	0	0	2	2	65	40	0	6	0	0	0
190	JL05	杨健	胡瑞华	湖北省荆州市监利市	毛市镇杨湾村	王翠娥		5	0	0	2	2	2	1	2	60	40	0	12	0	0	0	2	1	64	40	1	12	0	0	0
191	JL05	杨健	胡瑞华	湖北省荆州市监利市	毛市镇杨湾村	饶承义	18827110893	5	0	0	2	2	2	1	2	57	30	0	6	0	2	1	2	1	56	30	0	0	0	0	0
192	JL05	杨健	胡瑞华	湖北省荆州市监利市	毛市镇杨湾村	曹必山	18995852980	5	0	1	2	2	2	1	1	55	30	1	9	0	0	0	2	2	56	30	0	9	0	0	0
193	SS02	尤云舒鸿	胡瑞华	湖北省荆州市监利市	高基庙镇百子庵村	肖先生		5	2	0	5	3	3	1	1	70	50	0	3	0	0	0							0	0	0
194	JL01	胡瑞华	胡瑞华	湖北省荆州市监利市	网市镇北口村	金女士		4	0	2	2	2	2	1	2	63	1	0	0	0	0	0	2	1	64	40	1	7	0	0	0
195	JL05	胡瑞华	胡瑞华	湖北省荆州市监利市	毛市镇杨湾村	曹先生		8	2	0	2	6	2	1	1	72	40	0	0	0	0	0	2	2	78	40	0	0	0	0	0
196	JL05	胡瑞华	胡瑞华	湖北省荆州市监利市	毛市镇杨湾村	吴女士		8	1	0	1	4	1	1	2	68	30	0	0	0	0	0
197	JL05	胡瑞华	胡瑞华	湖北省荆州市监利市	毛市镇杨湾村	冉先生		11	2	1	7	6	2	1	1	57	12	0	12	0	0	0
198	JL05	胡瑞华	胡瑞华	湖北省荆州市监利市	毛市镇杨湾村	燕先生		5	1	0	2	3	2	1	1	64	40	0	6	0	0	0	2	2	63	40	0	6	0	0	0
199	JL03	胡瑞华	胡瑞华	湖北省荆州市监利市	毛市镇崔吴村	姚先生		5	0	0	5	3	2	1	1	38	1	0	9	0	0	0
200	JL03	胡瑞华	胡瑞华	湖北省荆州市监利市	毛市镇崔吴村	姚启明		12	3	3	2	9	2	1	1	69	30	0	9	0	0	0	2	2	70	30	0	6	0	0	0
201	JL03	胡瑞华	胡瑞华	湖北省荆州市监利市	毛市镇崔吴村	崔先生		9	0	3	5	6	2	1	1	60	40	1	9	0	2	1	2	2	59	40	1	0	0	0	0
202	JL03	胡瑞华	胡瑞华	湖北省荆州市监利市	毛市镇崔吴村	姚先生		4	0	0	2	4	2	1	1	56	30	0	0	0	0	0	2	2	55	30	0	0	0	0	0
203	JL03	胡瑞华	胡瑞华	湖北省荆州市监利市	毛市镇崔吴村	姚先生		6	0	2	2	4	2	1	1	60	40	0	6	0	6	1	2	2	54	40	0	6	0	0	0
204	JL01	胡瑞华	胡瑞华	湖北省荆州市监利市	网市镇北口村	陈先生		8	0	0	2	4	2	1	1	58	40	0	7	0	12	1	2	2	59	40	0	7	0	0	0
205	JL02	胡瑞华	胡瑞华	湖北省荆州市监利市	网市镇万佛寺村	黄先生		6	0	2	2	4	2	2	1	64	30	0	5	0	0	0	2	2	64	30	0	5	0	0	0
206	JL02	胡瑞华	胡瑞华	湖北省荆州市监利市	网市镇万佛寺村	彭先生		4	0	0	2	3	2	1	1	64	40	0	7	0	0	0	2	2	62	40	0	0	0	0	0
207	JL02	胡瑞华	胡瑞华	湖北省荆州市监利市	网市镇万佛寺村	黄先生		2	1	0	2	2	1	1	1	65	40	0	7	0	0	0	2	2	60	40	0	7	0	0	0
208	JL02	胡瑞华	胡瑞华	湖北省荆州市监利市	网市镇万佛寺村	黄先生		5	0	0	2	2	2	1	2	52	10	0	7	0	0	0	2	1	55	10	0	7	0	0	0
209	JL02	胡瑞华	胡瑞华	湖北省荆州市监利市	网市镇万佛寺村	吴先生		6	0	2	2	4	2	1	1	61	0	0	10	0	0	0	2	2	61	40	0	5	0	0	0
210	JL01	胡瑞华	胡瑞华	湖北省荆州市监利市	网市镇北口村	陈先生		4	0	0	4	2	2	1	1	62	40	0	7	0	0	0	2	2	60	40	0	10	0	0	0
211	JL01	胡瑞华	胡瑞华	湖北省荆州市监利市	网市镇北口村	陈先生		4	0	0	2	3	2	1	1	59	30	0	10	0	0	0	2	2	57	30	0	10	0	0	0
212	JL02	胡瑞华	胡瑞华	湖北省荆州市监利市	网市镇万佛寺村	黄先生		6	1	2	2	4	2	1	1	65	35	0	0	0	0	0	2	2	63	35	0	7	0	0	0
213	JL05	胡瑞华	胡瑞华	湖北省荆州市监利市	毛市镇杨湾村	冉先生		4	2	0	2	3	2	1	1	70	40	0	0	0	0	0	2	2	68	40	0	0	0	0	0
214	JL01	杨健	胡瑞华	湖北省荆州市监利市	网市镇北口村	鄢春枝		4	0	0	2	4	2	1	2	51	30	0	6	0	0	0	2	1	50	30	0	6	0	2	1
215	SS02	胡瑞华	胡瑞华	湖北省荆州市石首市	高基庙镇百子庵村	王珍平	15572002580	3	0	0	2	2	1	1	1	50	30	1	9	0	0	0
216	SS04	胡瑞华	胡瑞华	湖北省荆州市石首市	团山寺镇长安村	王女士		6	0	0	3	5	3	1	2	55	30	1	5	0	0	0
217	SS04	胡瑞华	胡瑞华	湖北省荆州市石首市	团山寺镇长安村	彭先生		3	0	0	2	2	2	1	1	43	3	0	12	0	0	0	2	2	36	3	0	12	1	0	0
218	SS04	胡瑞华	胡瑞华	湖北省荆州市石首市	团山寺镇长安村	雷女士		5	1	0	3	4	2	1	2	64	30	0	6	0	0	0	2	1	66	30	1	6	0	0	0
219	SS01	尤云舒鸿	胡瑞华	湖北省荆州市石首市	高基庙镇津南村	吴烈容		4	1	1	4	2	2	1	1	58	40	0	9	0	3	1
220	SS04	胡瑞华	胡瑞华	湖北省荆州市石首市	团山寺镇长安村	万女士		6	1	0	2	5	2	1	2	74	40	1	6	0	0	0
221	SS04	胡瑞华	胡瑞华	湖北省荆州市石首市	团山寺镇长安村	刘先生		7	1	2	6	4	2	1	1	58	30	0	6	0	0	0
222	SS04	胡瑞华	胡瑞华	湖北省荆州市石首市	团山寺镇长安村	郑金莲		3	0	0	2	3	2	1	2	50	30	1	6	0	0	0
223	SS05	胡瑞华	胡瑞华	湖北省荆州市石首市	团山寺镇曹家场村	胡春彩		2	2	0	2	2	2	1	1	68	30	0	6	0	0	0	2	2	65	30	0	6	0	0	0
224	SS05	胡瑞华	胡瑞华	湖北省荆州市石首市	团山寺镇曹家场村	王先生		3	0	0	2	3	2	1	1	59	7	0	12	0	0	0	2	2	58	7	0	6	0	0	0
225	SS05	胡瑞华	胡瑞华	湖北省荆州市石首市	团山寺镇曹家场村	苏正柏		6	2	0	2	4	2	1	1	70	40	1	6	0	0	0	2	2	68	40	1	6	0	0	0
226	SS05	胡瑞华	胡瑞华	湖北省荆州市石首市	团山寺镇曹家场村	张玉明		6	1	0	2	4	2	1	1	65	40	1	6	0	0	0	2	2	61	40	0	6	0	0	0
227	SS01	胡瑞华	胡瑞华	湖北省荆州市石首市	高基庙镇津南村	董德华		5	0	1	3	2	2	1	1	55	5	0	9	0	12	3
228	SS01	胡瑞华	胡瑞华	湖北省荆州市石首市	高基庙镇津南村	齐先生		6	0	0	6	4	2	1	1	59	40	0	12	0	0	0
229	SS01	胡瑞华	胡瑞华	湖北省荆州市石首市	高基庙镇津南村	吴许香		6	2	2	2	4	2	1	1	69	55	1	6	0	0	0	2	2	70	55	0	6	0	0	0
230	SS01	胡瑞华	胡瑞华	湖北省荆州市石首市	高基庙镇津南村	徐先生		5	0	1	4	3	2	1	1	60	45	0	5	0	1	1	2	2	61	40	0	5	0	0	0
231	SS01	胡瑞华	胡瑞华	湖北省荆州市石首市	高基庙镇津南村	董怀志		6	0	2	6	4	2	1	1	53	40	0	12	0	0	0
232	SS02	胡瑞华	胡瑞华	湖北省荆州市石首市	高基庙镇百子庵村	刘智茂	13387206781	4	0	1	1	1	1	1	1	60	40	0	8	0	0	0
233	SS02	胡瑞华	胡瑞华	湖北省荆州市石首市	高基庙镇百子庵村	王先生		10	1	0	2	5	2	1	1	51	20	0	9	0	0	0
234	SS02	胡瑞华	胡瑞华	湖北省荆州市石首市	高基庙镇百子庵村	刘金元		7	0	1	3	6	2	1	1	60	40	0	7	0	0	0	2	2	59	40	0	7	0	0	0
235	SS02	胡瑞华	胡瑞华	湖北省荆州市石首市	高基庙镇百子庵村	郑在鹤		2	2	0	2	0	1	1	1	68	50	0	6	0	0	0
236	SS01	黄炎忠	胡瑞华	湖北省荆州市石首市	高基庙镇津南村	阎和义		6	0	2	6	4	2	1	1	59	9	0	12	0	3	5
237	SS04	胡瑞华	胡瑞华	湖北省荆州市石首市	团山寺镇长安村	廖先生		5	1	1	2	4	2	1	1	52	30	0	6	0	0	0	2	2	51	30	0	6	0	0	0
238	SS04	胡瑞华	胡瑞华	湖北省荆州市石首市	团山寺镇长安村	王从新		2	1	0	2	0	1	1	1	56	30	0	9	0	0	0
239	SS03	尤云舒鸿	胡瑞华	湖北省荆州市石首市	团山寺镇长安村	徐女士		5	2	0	2	2	1	1	2	48	3	0	10	0	0	0	2	1	48	10	0	9	0	12	5
240	SS03	尤云舒鸿	胡瑞华	湖北省荆州市石首市	团山寺镇过脉岭村	苏先生		5	2	0	2	3	2	1	1	66	40	0	9	0	6	1
241	SS03	尤云舒鸿	胡瑞华	湖北省荆州市石首市	团山寺镇过脉岭村	徐先生		6	2	0	3	3	2	1	1	70	40	0	6	0	0	0
242	SS03	尤云舒鸿	胡瑞华	湖北省荆州市石首市	团山寺镇过脉岭村	胡先生		4	0	0	2	2	2	1	1	63	30	0	0	0	0	0
243	SS03	尤云舒鸿	胡瑞华	湖北省荆州市石首市	团山寺镇过脉岭村	熊先生		7	1	0	5	4	1	1	1	71	50	0	6	0	0	0
244	SS03	尤云舒鸿	胡瑞华	湖北省荆州市石首市	团山寺镇过脉岭村	郑先生		5	1	1	2	2	1	1	1	61	30	0	9	0	0	0
245	SS03	尤云舒鸿	胡瑞华	湖北省荆州市石首市	团山寺镇过脉岭村	龚先生		5	1	2	1	3	1	1	1	63	30	0	9	0	0	0
246	SS03	黄炎忠	胡瑞华	湖北省荆州市石首市	团山寺镇过脉岭村	罗丕连		5	2	0	2	4	1	1	1	80	60	0	6	0	0	0
247	SS03	尤云舒鸿	胡瑞华	湖北省荆州市石首市	团山寺镇过脉岭村	高先生		6	0	1	6	4	2	1	1	59	30	0	6	0	0	0
248	SS05	尤云舒鸿	胡瑞华	湖北省荆州市石首市	团山寺镇曹家场村	徐先生		5	0	0	3	3	1	1	1	59	30	0	6	0	0	0
249	SS05	尤云舒鸿	胡瑞华	湖北省荆州市石首市	团山寺镇曹家场村	苏先生		8	2	0	1	5	1	1	1	67	40	0	6	0	0	0
250	SS03	尤云舒鸿	胡瑞华	湖北省荆州市石首市	团山寺镇曹家场村	盛先生		4	1	0	2	2	1	1	1	61	30	0	3	0	0	0
251	XT001	黄焕怡	黄焕怡	湖北省仙桃市	张沟镇中心村	唐贤木	15027324814	5	1	1	5	3	1	1	1	77	60	1	6	0	0	0
252	XT002	黄焕怡	黄焕怡	湖北省仙桃市	张沟镇朱坊村	朱宇平	15629279315	3	0	0	3	3	2	1	1	36	5	1	12	0	10	5	4	1	62	45	0	6	0	8	1
253	XT002	黄焕怡	黄焕怡	湖北省仙桃市	张沟镇朱坊村	陈红娇	13407271850	5	0	1	2	2	2	1	2	46	30	0	4	0	0	0	2	1	50	35	0	9	0	0	0
254	XT003	黄焕怡	黄焕怡	湖北省仙桃市	张沟镇前丰村	胡同普		5	2	0	3	3	3	1	1	75	50	0	6	0	0	0	3	1	50	35	1	12	0	6	1
255	XT003	黄焕怡	黄焕怡	湖北省仙桃市	张沟镇前丰村	杨金仿	13407292177	3	1	0	3	2	2	1	1	55	35	0	9	0	0	0	2	2	54	35	0	6	0	0	0
256	XT003	黄焕怡	黄焕怡	湖北省仙桃市	张沟镇前丰村	向得良	13451153137	4	0	0	3	3	1	1	1	56	40	1	6	0	6	4
257	XT003	黄焕怡	黄焕怡	湖北省仙桃市	张沟镇前丰村	袁作新	15027258118	2	2	0	2	2	2	1	1	78	60	1	4	0	0	0
258	XT003	黄焕怡	黄焕怡	湖北省仙桃市	张沟镇前丰村	陈彩清		4	1	0	3	3	1	1	1	74	55	0	6	0	0	0
259	XT004	黄焕怡	黄焕怡	湖北省仙桃市	彭场镇木兰村	颜培金	15971984259	3	0	0	2	2	2	1	1	53	30	0	6	0	4	3	2	2	53	30	0	6	0	0	0
260		黄焕怡	黄焕怡	湖北省仙桃市	彭场镇联合村	杨珍强	18307287548	2	0	0	2	2	2	1	1	63	45	0	6	0	0	0
261		黄焕怡	黄焕怡	湖北省仙桃市	彭场镇联合村	印天才	19907223283	2	2	0	2	2	2	1	1	73	55	0	9	0	0	0	2	2	71	50	0	9	0	0	0
262		黄焕怡	黄焕怡	湖北省仙桃市	彭场镇万丰村	彭欢道	15671155687	5	2	1	5	3	3	1	1	34	10	1	9	0	6	1
263	XT004	黄焕怡	黄焕怡	湖北省仙桃市	彭场镇木兰村	廖小发	13972175859	5	0	0	2	2	2	1	1	55	35	0	9	0	6	3	2	2	52	30	1	4	0	0	0
264	XT005	黄焕怡	黄焕怡	湖北省仙桃市	彭场镇七里村	李平姣	15926096003	3	0	0	2	2	2	1	1	53	35	0	9	0	6	3
265	XT005	黄焕怡	黄焕怡	湖北省仙桃市	彭场镇七里村	周德强		3	2	0	2	2	2	1	1	67	55	1	9	0	0	0
266	XT005	黄焕怡	黄焕怡	湖北省仙桃市	彭场镇七里村	李华勤	15826938246	3	0	0	3	2	2	1	1	55	35	0	6	0	4	1	2	2	54	35	0	5	0	0	0
267	XT005	黄焕怡	黄焕怡	湖北省仙桃市	彭场镇七里村	印宝军	15827998165	3	3	0	3	2	2	1	1	73	50	0	6	0	3	1	2	2	72	50	0	6	0	0	0
268	XT005	黄焕怡	黄焕怡	湖北省仙桃市	彭场镇七里村	周双喜	13377953865	5	2	0	3	2	1	1	1	50	30	0	9	0	3	1
269	XT005	黄焕怡	黄焕怡	湖北省仙桃市	彭场镇七里村	赵咸木	15271149848	4	2	0	2	2	2	1	1	70	50	0	5	0	0	0	2	2	66	45	0	4	0	0	0
270	XT006	黄焕怡	黄焕怡	湖北省仙桃市	毛嘴镇秦杨村	李启中	13677281673	6	0	2	4	1	1	1	1	59	40	1	6	0	8	1
271	XT006	黄焕怡	黄焕怡	湖北省仙桃市	毛嘴镇秦杨村	丁克成	13886986431	5	0	1	2	2	2	1	1	59	40	0	9	1	6	4	2	2	55	35	0	6	0	0	0
272	XT006	黄焕怡	黄焕怡	湖北省仙桃市	毛嘴镇秦杨村	秦明桃	13339700426	3	1	0	2	2	2	1	1	67	45	0	7	0	0	0	2	2	64	45	1	6	0	0	0
273	XT006	黄焕怡	黄焕怡	湖北省仙桃市	毛嘴镇秦杨村	易美秀	15334206785	5	0	1	3	2	2	1	2	52	30	0	12	1	0	0	2	1	53	30	0	9	0	0	0
274	XT006	黄焕怡	黄焕怡	湖北省仙桃市	毛嘴镇秦杨村	秦新成	13407237348	3	0	0	2	1	1	1	1	63	45	0	9	0	0	0
275	XT006	黄焕怡	黄焕怡	湖北省仙桃市	毛嘴镇秦杨村	秦顺利	13697371320	5	0	1	3	2	1	1	1	54	35	0	12	1	0	0
276	XT006	黄焕怡	黄焕怡	湖北省仙桃市	毛嘴镇秦杨村	肖升元	19971587309	3	0	0	3	2	2	1	1	64	45	0	6	0	0	0
277	QJ007	黄焕怡	黄焕怡	湖北省潜江市	老新镇三桥村	马友禄	13593901880	3	2	0	2	2	2	1	1	67	50	1	5	0	0	0	2	2	67	50	1	2	0	0	0
278	QJ007	黄焕怡	黄焕怡	湖北省潜江市	老新镇三桥村	杨荣芝	15926056033	5	2	0	3	2	2	1	1	70	50	1	5	0	0	0	2	2	68	50	0	2	0	0	0
279	QJ007	黄焕怡	黄焕怡	湖北省潜江市	老新镇三桥村	田环英	13035382262	5	0	0	1	1	1	1	2	63	45	1	2	0	0	0
280	QJ007	黄焕怡	黄焕怡	湖北省潜江市	老新镇三桥村	华荣云	13477404428	4	0	0	2	2	2	1	1	52	30	0	12	1	0	0	2	2	51	30	0	6	0	0	0
281	QJ008	黄焕怡	黄焕怡	湖北省潜江市	老新镇赤生村	王罗云	18672828642	4	0	0	4	2	2	1	1	41	20	0	6	0	6	1	2	2	36	20	0	6	0	0	0
282	QJ008	黄焕怡	黄焕怡	湖北省潜江市	老新镇赤生村	刘经杰	13117242192	5	0	1	3	2	2	1	1	59	40	0	8	0	0	0	2	2	60	40	0	2	0	0	0
283	QJ008	黄焕怡	黄焕怡	湖北省潜江市	老新镇赤生村	刘经浩	13235534462	7	1	0	5	2	2	1	1	59	40	0	12	1	0	0	2	2	55	35	1	5	0	0	0
284	QJ008	黄焕怡	黄焕怡	湖北省潜江市	老新镇赤生村	徐小姣	13886953452	5	0	0	1	1	1	1	2	55	35	0	12	1	0	0	2	1	55	35	0	9	0	10	3
285	QJ009	黄焕怡	黄焕怡	湖北省潜江市	龙湾镇沱口村	郑绍光	18071997466	6	0	0	2	2	2	1	1	55	35	1	9	0	0	0	2	2	54	35	1	9	0	0	0
286	QJ009	黄焕怡	黄焕怡	湖北省潜江市	龙湾镇沱口村	肖开万	15572809060	4	1	0	2	1	1	1	1	59	40	0	12	0	0	0
287	QJ009	黄焕怡	黄焕怡	湖北省潜江市	龙湾镇沱口村	王祖荣	15027357659	4	0	0	1	1	1	1	1	58	40	1	12	0	0	0
288	QJ009	黄焕怡	黄焕怡	湖北省潜江市	龙湾镇沱口村	肖本林	15586281540	4	0	0	3	3	3	1	1	60	45	0	9	0	0	0	2	2	60	45	0	0	0	0	0
289	QJ009	黄焕怡	黄焕怡	湖北省潜江市	龙湾镇沱口村	李巨模	17763008672	3	2	0	2	2	2	1	1	67	50	0	6	0	0	0	2	2	67	50	1	6	0	0	0
290	QJ009	黄焕怡	黄焕怡	湖北省潜江市	龙湾镇沱口村	周先应	15572819110	8	2	1	7	4	1	1	1	48	30	0	9	0	6	1
291	QJ011	黄焕怡	黄焕怡	湖北省潜江市	积玉口镇积玉村	黄学平	15027354491	3	0	0	0	2	1	1	1	49	25	0	9	0	0	0
292	QJ011	黄焕怡	黄焕怡	湖北省潜江市	积玉口镇积玉村	张正恒	13197451984	7	1	2	7	4	1	1	1	57	40	0	6	0	6	1
293	QJ011	黄焕怡	黄焕怡	湖北省潜江市	积玉口镇积玉村	张明勇	13407263828	6	0	1	6	4	2	1	1	58	40	1	9	0	4	1	2	2	58	40	0	6	0	0	0
294	QJ011	黄焕怡	黄焕怡	湖北省潜江市	积玉口镇积玉村	张中华	15027290957	5	0	1	4	2	2	1	1	50	32	0	9	1	0	0	2	2	50	30	0	9	0	0	0
295	QJ012	黄焕怡	黄焕怡	湖北省潜江市	积玉口镇直属村	李定平	19986396588	6	2	1	3	2	1	1	1	41	25	0	5	0	6	1
296	QJ012	黄焕怡	黄焕怡	湖北省潜江市	积玉口镇直属村	张青松	13349715022	4	1	0	3	2	1	1	1	47	30	0	7	0	6	1
297	QJ012	黄焕怡	黄焕怡	湖北省潜江市	积玉口镇直属村	蔡经	13117124836	6	0	0	6	4	2	1	1	56	40	0	9	0	4	1	2	2	54	35	1	6	0	0	0
298	QJ013	黄焕怡	黄焕怡	湖北省潜江市	浩口镇莲子垸村	王凡	13477428794	4	1	0	3	2	2	1	1	51	35	0	12	1	0	0
299	QJ014	黄焕怡	黄焕怡	湖北省潜江市	浩口镇观音村	陈九荣	15027358422	2	2	0	2	2	2	1	1	68	50	1	3	0	0	0	2	2	66	45	1	1	0	0	0
300	QJ014	黄焕怡	黄焕怡	湖北省潜江市	浩口镇观音村	田一龙	18986951215	2	2	0	2	2	2	1	1	76	60	1	1	0	0	0	2	2	75	55	0	1	0	0	0
301	SS05	黄炎忠	黄炎忠	湖北省荆州市石首市	团山寺镇曹家场村	赵家坤	无	9	2	0	2	2	2	1	1	74	54	0	6	0	0	0
302	SS05	黄炎忠	黄炎忠	湖北省荆州市石首市	团山寺镇曹家场村	苏上中	无	2	0	0	2	2	2	1	1	57	37	0	6	0	4	3
303	SS05	黄炎忠	黄炎忠	湖北省荆州市石首市	团山寺镇曹家场村	郑孝军	无	2	2	0	0	1	1	1	1	52	20	0	9	0	0	0
304	SS04	黄炎忠	黄炎忠	湖北省荆州市石首市	团山寺镇长安村	郑孝春	无	2	2	0	2	2	1	1	1	66	46	0	12	0	0	0
305	SS03	黄炎忠	黄炎忠	湖北省荆州市石首市	团山寺镇过脉岭村	王从阳	无	3	0	0	3	3	1	1	1	58	38	0	6	0	3	3
306	SS03	黄炎忠	黄炎忠	湖北省荆州市石首市	团山寺镇过脉岭村	李华兵	无	6	1	1	5	0	1	1	1	65	45	0	9	0	0	0
307	SS03	黄炎忠	黄炎忠	湖北省荆州市石首市	团山寺镇过脉岭村	周启明	无	2	0	0	1	1	1	1	1	63	43	1	6	0	0	0
308	SS03	黄炎忠	黄炎忠	湖北省荆州市石首市	团山寺镇过脉岭村	田方照	无	4	0	0	2	0	1	1	1	56	36	0	6	0	4	2
309	SS03	黄炎忠	黄炎忠	湖北省荆州市石首市	团山寺镇过脉岭村	罗生安	无	2	2	0	2	2	2	1	1	70	0	1	6	0	0	0
310	JL03	黄炎忠	黄炎忠	湖北省荆州市监利市	毛市镇崔吴村	吴为平	无	1	0	0	1	1	1	1	1	59	39	0	9	0	2	1
311	JL05	黄炎忠	黄炎忠	湖北省荆州市监利市	毛市镇杨湾村	曹名忠	无	5	0	3	5	1	2	1	1	62	42	0	6	0	0	0
312	JL01	黄炎忠	黄炎忠	湖北省荆州市监利市	网市镇北口村	张志清	无	4	2	0	2	0	1	1	1	75	55	1	0	0	0	0
313	JL02	黄炎忠	黄炎忠	湖北省荆州市监利市	网市镇万佛寺村	韩从新	无	5	0	0	3	4	2	1	1	64	44	1	9	0	0	0
314	JL04	黄炎忠	黄炎忠	湖北省荆州市监利市	毛市镇老河村	冉幼华	无	2	0	0	2	1	1	1	1	52	30	0	6	0	2	1
315	JL04	黄炎忠	黄炎忠	湖北省荆州市监利市	毛市镇老河村	冉幼民	无	3	0	0	2	2	2	1	1	46	26	0	9	0	2	1
316	JL04	黄炎忠	黄炎忠	湖北省荆州市监利市	毛市镇老河村	冉秀才	无	8	0	0	2	4	2	1	1	62	48	1	2	0	2	1
317	JL04	黄炎忠	黄炎忠	湖北省荆州市监利市	毛市镇老河村	冉幼海	无	8	2	1	2	2	2	1	1	80	60	0	6	0	0	0
318	JL04	黄炎忠	黄炎忠	湖北省荆州市监利市	毛市镇老河村	冉利军	无	5	2	1	2	2	1	1	1	79	56	0	6	0	0	0
319	JL04	黄炎忠	黄炎忠	湖北省荆州市监利市	毛市镇老河村	冉幼斌	无	4	2	0	2	2	1	1	1	78	50	0	0	0	0	0
320	JL05	黄炎忠	黄炎忠	湖北省荆州市监利市	毛市镇杨湾村	曹必学	无	2	2	0	2	2	2	1	1	66	46	0	12	0	0	0
321	JL05	黄炎忠	黄炎忠	湖北省荆州市监利市	毛市镇杨湾村	冉幼珍	无	9	2	3	5	4	2	1	1	66	46	0	6	0	0	0
322	JL05	黄炎忠	黄炎忠	湖北省荆州市监利市	毛市镇杨湾村	曹 勇	无	6	0	2	6	4	4	1	1	40	20	0	11	1	2	1	4	1	64	0	0	6	0	0
323	JL05	黄炎忠	黄炎忠	湖北省荆州市监利市	毛市镇杨湾村	曹必兵	无	3	0	0	2	2	1	1	1	60	30	0	9	0	5	0
324	JL02	黄炎忠	黄炎忠	湖北省荆州市监利市	网市镇万佛寺村	韩从彦	无	5	0	0	3	3	2	1	1	60	40	0	12	1	0	0	2	2	61	39	0	6	1	0	0
325	JL02	黄炎忠	黄炎忠	湖北省荆州市监利市	网市镇万佛寺村	韩从景	无	7	1	2	4	4	2	1	1	65	45	0	9	1	0	0
326	JL02	黄炎忠	黄炎忠	湖北省荆州市监利市	网市镇万佛寺村	韩从祖	无	6	2	0	3	1	2	1	1	66	46	0	6	0	1	1
327	JL02	黄炎忠	黄炎忠	湖北省荆州市监利市	网市镇万佛寺村	李运祥	无	3	0	0	2	3	2	1	1	54	36	0	9	0	0		2	1	53	35	0	9	0	0	0
328	JL01	黄炎忠	黄炎忠	湖北省荆州市监利市	网市镇北口村	陈义常	无	9	0	3	3	4	1	1	1	60	40	0	9	0	2	4
329	JL01	黄炎忠	黄炎忠	湖北省荆州市监利市	网市镇北口村	李中波	无	5	2	1	3	4	2	1	1	69	49	0	9	0	0	0	2	2	68	48	0	0	0	0	0
330	JL01	黄炎忠	黄炎忠	湖北省荆州市监利市	网市镇北口村	李忠浪	无	3	2	0	2	2	2	1	1	65	45	1	9	0	0	0
331	JL01	黄炎忠	黄炎忠	湖北省荆州市监利市	网市镇北口村	陈辉祥	无	9	0	3	4	4	2	1	1	63	43	0	9	1	0	0	2	2	63	43	0	6	0	0	0
332	XZ0112	李雨柯	李雨柯	湖北省襄阳市襄州区	张家集镇聂岗村	路有武	15172642078	3	0	0	3	2	2	1	1	62	44	1	11	0	3	1	2	2	62	44	1	11	0	0	0
333	XZ0113	李雨柯	李雨柯	湖北省襄阳市襄州区	张家集镇聂岗村	杨富江	13871768696	2	2	0	2	2	2	1	1	66	50	0	11	0	0	0	2	2	66	50	0	5	0	0	0
334	XZ0118	马文烁	李雨柯	湖北省襄阳市襄州区	张家集镇聂岗村	宋广安	13207230843	6	0	0	2	4	2	1	2	58	40	0	9	0	0	0	2	1	57	40	0	9	0	0	0	3	2	35	11	0	16	0	12	5	3	1	35	0	0	9	0	12	3
335	XZ0119	马文烁	李雨柯	湖北省襄阳市襄州区	张家集镇聂岗村	张新江	18271782655	3	0	0	2	2	2	1	1	61	43	0	9	0	0	0	2	2	62	44	1	12	0	0	0	3	1	34	0	0	9	0	12	5
336	XZ0120	马文烁	李雨柯	湖北省襄阳市襄州区	张家集镇聂岗村	张同文	13797747437	4	0	0	4	2	2	1	1	45	20	0	9	0	2	1	2	2	44	20	0	6	0	0	0
337	XZ0121	马文烁	李雨柯	湖北省襄阳市襄州区	张家集镇聂岗村	王代春	13581426181	4	2	0	2	2	2	1	1	71	53	0	6	1	0	0	2	2	68	45	0	6	0	0	0
338	XZ0203	李雨柯	李雨柯	湖北省襄阳市襄州区	张家集镇李营村	张小秋		6	0	1	3	2	2	1	2	49	31	0	5	0	0	0	2	1	51	33	0	7	0	4	1
339	XZ0204	李雨柯	李雨柯	湖北省襄阳市襄州区	张家集镇李营村	李远武		2	1	0	2	1	1	1	1	67	49	1	5	0	0	0	2	2	54	36	1	5	0	0	0
340	XZ0205	李雨柯	李雨柯	湖北省襄阳市襄州区	张家集镇李营村	李有保	16520552309	3	0	1	3	2	2	1	1	62	44	1	5	0	0	0	2	2	63	45	1	4	0	0	0
341	XZ0301	李雨柯	李雨柯	湖北省襄阳市襄州区	张家集镇官沟村	梁腊顺	13581417051	6	2	2	5	4	3	1	2	31	2	0	14	1	0	0	2	1	31	0	0	8	0	10	4
342	XZ0302	李雨柯	李雨柯	湖北省襄阳市襄州区	张家集镇官沟村	梁光顺	13117217679	5	2	0	2	4	2	1	1	74	56	1	4	1	0	0	2	2	71	54	1	0	0	0	0
343	XZ0303	李雨柯	李雨柯	湖北省襄阳市襄州区	张家集镇官沟村	梁光宏	13581429776	5	2	0	3	1	1	1	1	71	56	1	6	0	0	0
344	XZ0304	李雨柯	李雨柯	湖北省襄阳市襄州区	张家集镇官沟村	韩顺国	18271216806	3	1	3	2	2	1	1	1	58	45	1	6	0	0	0	2	2	58	45	0	4	0	0	0
345	XZ0319	马文烁	李雨柯	湖北省襄阳市襄州区	张家集镇官沟村	梁建华	18908672229	3	1	0	3	2	2	1	1	50	11	0	15	1	0	0	2	2	48	10	0	15	1	12	1
346	XZ0320	马文烁	李雨柯	湖北省襄阳市襄州区	张家集镇官沟村	任伏清	19171221927	7	0	2	4	5	2	1	2	58	40	0	3	0	0	0	2	1	56	40	0	9	0	0	0
347	XZ0321	马文烁	李雨柯	湖北省襄阳市襄州区	张家集镇官沟村	李银兰	13227508707	7	1	0	5	3	3	1	2	55	40	0	6	0	0	0	2	1	56	40	0	9	1	12	1	3	1	34	15	0	9	0	6	4
348	XZ0322	马文烁	李雨柯	湖北省襄阳市襄州区	张家集镇官沟村	李群发	13871632607	4	0	0	4	2	2	1	1	48	25	0	15	1	0	0	2	2	48	25	0	9	0	12	1
349	XZ0323	马文烁	李雨柯	湖北省襄阳市襄州区	张家集镇官沟村	侯国旺	13871652018	4	0	1	1	3	1	1	1	62	45	1	12	1	0	0
350	XZ0324	马文烁	李雨柯	湖北省襄阳市襄州区	张家集镇官沟村	宋小丽	18327516012	6	2	1	6	2	2	1	2	38	16	0	12	1	0	0	2	1	39	17	0	9	0	12	1
351	XZ0408	李雨柯	李雨柯	湖北省襄阳市襄州区	峪山镇黄湾村	刘明星		8	1	1	2	6	2	1	1	65	47	1	11	1	0	0	2	2	63	45	1	5	0	0	0	3	1	37	18	0	11	0	10	4	3	1	33	18	0	8	0	10	5
352	XZ0409	李雨柯	李雨柯	湖北省襄阳市襄州区	峪山镇黄湾村	尚莱亮		7	1	0	2	4	2	1	1	60	45	1	8	0	0	0	2	2	59	44	1	6	0	0	0
353	XZ0410	李雨柯	李雨柯	湖北省襄阳市襄州区	峪山镇黄湾村	李翠		10	2	2	8	3	1	2	1	67	47	1	2	0	0	0
354	XZ0411	李雨柯	李雨柯	湖北省襄阳市襄州区	峪山镇黄湾村	黄明车		2	0	0	1	2	1	1	1	59	44	1	7	0	0	0
355	XZ0422	马文烁	李雨柯	湖北省襄阳市襄州区	峪山镇黄湾村	黄勇	15172631603	6	2	0	1	4	1	1	1	46	2	0	9	0	0	0
356	XZ0423	马文烁	李雨柯	湖北省襄阳市襄州区	峪山镇黄湾村	宋琴	19171242272	3	0	0	2	2	2	1	2	53	35	0	6	0	0	0	2	1	53	35	0	9	0	0	0
357	XZ0424	马文烁	李雨柯	湖北省襄阳市襄州区	峪山镇黄湾村	李芳	15872268109	4	0	0	1	4	1	1	2	48	28	0	9	0	0	0
358	XZ0504	李雨柯	李雨柯	湖北省襄阳市襄州区	峪山镇毕岗村	毕永安		3	0	0	2	3	2	1	1	57	42	1	5	0	10	1	2	2	55	40	1	5	0	0	0
359	XZ0505	李雨柯	李雨柯	湖北省襄阳市襄州区	峪山镇毕岗村	毕金国		6	0	1	4	4	2	1	1	60	45	0	6	1	3	1	2	2	62	47	0	0	0	0	0
360	XZ0513	马文烁	李雨柯	湖北省襄阳市襄州区	峪山镇毕岗村	毕金龙	15871968042	6	0	1	4	4	2	1	1	60	40	0	9	1	0	0	2	2	53	35	0	6	0	0	0
361	XZ0514	马文烁	李雨柯	湖北省襄阳市襄州区	峪山镇毕岗村	王永富	13476350747	2	0	0	2	2	2	1	1	62	45	0	9	0	12	1	2	2	61	45	0	0	0	0	0
362	XZ0607	李雨柯	李雨柯	湖北省襄阳市襄州区	峪山镇樊岗村	李秀荣		6	0	1	1	4	1	1	2	57	39	1	7	0	0	0	2	1	55	37	1	7	0	4	5
363	XZ0608	李雨柯	李雨柯	湖北省襄阳市襄州区	峪山镇樊岗村	王永华		6	2	1	1	2	2	1	2	50	35	0	5	0	0	0	2	1	53	38	0	5	0	6	2
364	XZ0609	李雨柯	李雨柯	湖北省襄阳市襄州区	峪山镇樊岗村	仇明荣		6	2	1	2	4	2	1	2	63	48	1	7	0	0	0	2	1	65	50	0	7	0	0	0
365	XZ0616	马文烁	李雨柯	湖北省襄阳市襄州区	峪山镇樊岗村	樊玉成	13627273092	4	1	0	4	2	2	1	1	45	27	0	9	0	3	3	2	2	44	27	0	9	0	0	0
366	XZ0617	马文烁	李雨柯	湖北省襄阳市襄州区	峪山镇樊岗村	樊时成	15072282903	5	0	0	2	4	2	1	1	61	40	0	12	0	0	0	2	2	61	40	0	0	0	0	0
367	XZ0618	马文烁	李雨柯	湖北省襄阳市襄州区	峪山镇樊岗村	樊倚顺	15997311179	6	0	0	2	4	2	1	2	57	35	0	5	0	0	0	1	1	63	40	0	9	0	0	0
368	XZ0705	李雨柯	李雨柯	湖北省襄阳市襄州区	双沟镇韦庄村	刘书华		4	1	0	3	2	2	1	1	58	40	0	5	0	10	5	2	2	58	40	0	7	0	4	1
369	XZ0706	李雨柯	李雨柯	湖北省襄阳市襄州区	双沟镇韦庄村	韦院生		4	1	0	3	2	2	1	2	58	40	0	7	0	4	5	2	1	58	40	0	5	0	10	1
370	XZ0707	李雨柯	李雨柯	湖北省襄阳市襄州区	双沟镇韦庄村	周若云		4	0	0	3	2	2	1	2	50	32	1	5	0	0	0	1	1	51	33	1	5	0	3	1
371	XZ0713	马文烁	李雨柯	湖北省襄阳市襄州区	双沟镇韦庄村	崔小萍	13972296651	2	0	0	2	2	2	1	2	55	40	0	0	0	0	0	2	1	54	40	0	0	0	0	0
372	XZ0714	马文烁	李雨柯	湖北省襄阳市襄州区	双沟镇韦庄村	韦传学	13871774786	3	0	0	2	2	2	1	1	47	30	1	9	0	6	1	2	2	48	30	1	9	0	12	1
373	XZ0805	李雨柯	李雨柯	湖北省襄阳市襄州区	双沟镇程冢村	程顺理		4	0	0	3	2	2	1	1	44	26	0	5	0	3	1	2	2	45	27	0	7	0	0	0
374	XZ0806	李雨柯	李雨柯	湖北省襄阳市襄州区	双沟镇程冢村	程阿姨		4	0	0	4	2	2	1	2	43	25	0	5	0	0	0	2	1	42	24	0	7	0	3	2
375	XZ0809	马文烁	李雨柯	湖北省襄阳市襄州区	双沟镇程冢村	朱德清	13871799786	5	0	0	2	5	2	1	1	52	40	1	6	0	0	0	2	2	54	40	1	0	0	0	0
376	XZ0810	马文烁	李雨柯	湖北省襄阳市襄州区	双沟镇程冢村	程付元	15271965491	3	0	0	3	2	2	1	1	51	37	0	6	0	2	1	2	2	51	37	0	6	0	2	1
377	ZY0105	马文烁	李雨柯	湖北省襄阳市枣阳市	兴隆镇灵庙村	程义军	15872316201	7	0	2	5	4	2	1	1	52	35	0	9	0	0	0	2	2	52	35	0	9	0	0	0
378	ZY0106	马文烁	李雨柯	湖北省襄阳市枣阳市	兴隆镇灵庙村	陈大明	13871644998	3	0	0	3	2	2	1	1	53	45	1	6	1	0	0	2	2	51	20	0	12	0	12	1
379	ZY0107	马文烁	李雨柯	湖北省襄阳市枣阳市	兴隆镇灵庙村	谢江俊	15342324976	2	2	0	2	2	2	1	1	67	50	0	9	0	0	0	2	2	65	50	0	12	0	0	0
380	ZY0108	马文烁	李雨柯	湖北省襄阳市枣阳市	兴隆镇灵庙村	谢远平	13797687237	4	0	0	4	4	2	1	1	63	45	0	12	0	0	0	2	2	63	45	0	9	0	0	0
381	ZY0205	李雨柯	李雨柯	湖北省襄阳市枣阳市	兴隆镇冯岗村	李义财		6	0	2	6	4	2	1	1	54	40	1	5	0	3	5	2	2	51	37	1	5	0	0	0
382	ZY0206	李雨柯	李雨柯	湖北省襄阳市枣阳市	兴隆镇冯岗村	李开元		4	0	0	2	2	2	1	1	54	36	1	6	0	0	0	2	2	54	38	1	6	0	0	0
383	ZY0207	李雨柯	李雨柯	湖北省襄阳市枣阳市	兴隆镇冯岗村	徐兴德		5	2	1	2	4	2	1	1	70	50	1	7	0	0	0	2	2	70	50	1	6	0	0	0
384	ZY0208	马文烁	李雨柯	湖北省襄阳市枣阳市	兴隆镇冯岗村	陈怀民	15871026963	7	1	1	2	5	1	1	1	56	40	0	9	0	0	0	2	2	52	37	0	9	0	0	0
385	ZY0209	马文烁	李雨柯	湖北省襄阳市枣阳市	兴隆镇冯岗村	夏长今	13114488896	3	0	0	2	3	2	1	1	59	40	0	9	0	9	1	2	2	57	40	0	9	0	9	1
386	ZY0411	李雨柯	李雨柯	湖北省襄阳市枣阳市	兴隆镇大堰村	谢立法		6	0	2	2	2	2	1	1	54	36	0	7	0	2	1	2	2	53	35	0	7	0	0	0
387	ZY0412	李雨柯	李雨柯	湖北省襄阳市枣阳市	兴隆镇大堰村	张永红		6	0	1	3	4	2	1	2	51	33	0	11	0	0	0	1	2	1	53	0	8	0	0	0
388	ZY0413	李雨柯	李雨柯	湖北省襄阳市枣阳市	兴隆镇大堰村	李玉林		4	0	1	4	1	1	1	1	37	22	0	9	1	1	1	2	2	38	23	0	9	0	0	0
389	ZY0414	李雨柯	李雨柯	湖北省襄阳市枣阳市	兴隆镇大堰村	王用林		5	0	1	2	4	4	1	1	62	44	0	6	0	1	1	2	2	61	43	0	8	0	0	0
390	ZY0415	李雨柯	李雨柯	湖北省襄阳市枣阳市	兴隆镇大堰村	袁车军		3	0	0	2	2	2	1	1	52	32	1	8	1	12	1	2	2	56	36	1	7	0	0	0
391	ZY0416	李雨柯	李雨柯	湖北省襄阳市枣阳市	兴隆镇大堰村	李开国		3	0	0	2	2	2	1	1	53	35	0	8	0	3	5	2	2	53	35	1	7	0	0	0
392	ZY0422	马文烁	李雨柯	湖北省襄阳市枣阳市	兴隆镇大堰村	周金娥	15838702841	4	0	0	3	3	2	1	2	54	38	0	6	0	0	0	2	1	60	45	0	6	0	0	0
393	ZY0512	马文烁	李雨柯	湖北省襄阳市枣阳市	南城街道后湖村	李银华	13803850447	6	2	1	5	5	2	1	2	65	45	0	7	0	0	0	1	2	1	66	0	7	0	0	0
394	ZY0513	马文烁	李雨柯	湖北省襄阳市枣阳市	南城街道后湖村	李明国	18327532668	3	1	0	1	1	1	1	1	52	38	0	6	0	0	0	2	2	53	38	0	6	0	12	3
395	ZY0514	马文烁	李雨柯	湖北省襄阳市枣阳市	南城街道后湖村	张东光	18327526872	1	1	0	1	1	1	1	1	68	50	0	12	0	0	0
396	ZY0517	李雨柯	李雨柯	湖北省襄阳市枣阳市	南城街道后湖村	严守芝		6	2	0	2	4	2	1	2	64	46	1	7	0	0	0	2	1	58	40	1	8	0	0	0
397	ZY0518	李雨柯	李雨柯	湖北省襄阳市枣阳市	南城街道后湖村	李法友		2	2	0	2	2	2	1	1	68	50	0	8	0	0	0	2	2	69	51	0	5	0	0	0
398	ZY0519	李雨柯	李雨柯	湖北省襄阳市枣阳市	南城街道后湖村	王大琴	18727003650	5	2	0	4	3	2	1	2	53	35	1	5	0	3	1	2	1	54	36	1	5	0	4	5
399	ZY0614	马文烁	李雨柯	湖北省襄阳市枣阳市	南城街道李家庄村	余耀清	15997194363	6	0	0	3	5	2	1	1	59	40	0	9	1	0	0	2	2	62	40	0	6	0	0	0
400	ZY0615	马文烁	李雨柯	湖北省襄阳市枣阳市	南城街道李家庄村	马辉银	16508891356	2	2	0	2	2	2	1	1	70	50	0	9	1	12	1	2	2	69	50	0	6	0	0	0
401	ZY0621	李雨柯	李雨柯	湖北省襄阳市枣阳市	南城街道李家庄村	李家江		8	2	2	6	2	2	1	1	54	36	1	7	0	0	0	2	2	55	37	1	7	0	0	0
402	ZY0622	李雨柯	李雨柯	湖北省襄阳市枣阳市	南城街道李家庄村	李顺国	18163129061	6	2	0	2	4	2	1	1	70	52	1	11	0	0	0	2	2	70	52	1	8	0	0	0
403	ZY0705	李雨柯	李雨柯	湖北省襄阳市枣阳市	南城街道彭岗村	陶光现		2	2	0	2	2	2	1	1	70	52	1	9	0	0	0	2	2	67	49	1	4	0	0	0
404	ZY0706	李雨柯	李雨柯	湖北省襄阳市枣阳市	南城街道彭岗村	彭德云		2	0	0	2	2	2	1	1	59	40	0	7	0	1	2	2	2	60	42	0	7	0	0	0
405	ZY0707	李雨柯	李雨柯	湖北省襄阳市枣阳市	南城街道彭岗村	彭登才		4	0	0	2	2	2	1	1	50	32	0	6	0	4	3	2	2	51	33	0	6	0	0	0
406	ZY0708	李雨柯	李雨柯	湖北省襄阳市枣阳市	南城街道彭岗村	彭德新		2	0	0	2	1	1	1	1	53	34	1	6	0	0	0	2	2	53	34	1	6	0	0	0
407	ZY0716	马文烁	李雨柯	湖北省襄阳市枣阳市	南城街道彭岗村	彭广学	13763172981	4	4	0	4	2	2	1	1	65	45	1	9	0	0	0	2	2	66	46	0	6	0	0	0
408	ZY0717	马文烁	李雨柯	湖北省襄阳市枣阳市	南城街道彭岗村	陶明会	18727131518	3	0	0	3	3	3	1	1	50	3	1	9	0	6	1	2	2	50	35	0	9	0	6	1	3	1	23	2	0	12	0	12	2
409	ZY0718	马文烁	李雨柯	湖北省襄阳市枣阳市	南城街道彭岗村	彭宏清	15997208992	3	0	0	2	2	2	1	1	50	35	0	12	1	0	0	2	2	50	35	0	9	0	0	0
410	ZY0719	马文烁	李雨柯	湖北省襄阳市枣阳市	南城街道彭岗村	陶光发	15603150381	2	2	0	2	1	1	1	1	78	60	1	6	0	0	0
411	ZY0804	李雨柯	李雨柯	湖北省襄阳市枣阳市	南城街道耿畈村	耿秋垣		1	0	0	1	1	1	1	1	64	46	1	5	0	0	0
412	ZY0809	马文烁	李雨柯	湖北省襄阳市枣阳市	南城街道耿畈村	耿锋	13972290233	2	0	0	2	2	2	1	1	51	38	0	6	0	0	0	2	2	51	38	0	9	0	0	0
413	ZY0810	马文烁	李雨柯	湖北省襄阳市枣阳市	南城街道耿畈村	黄永昌	13197199843	3	2	0	2	3	2	1	1	70	50	0	5	0	12	1	2	2	68	50	0	6	0	0	0
414	SY0201	杜三峡	李雨柯	湖北省荆门市沙洋县	五里铺镇赵集村	李在江	13277632195	4	1	1	4	3	1	1	1	54	30	0	12	1	12	1
415	SY0202	杜三峡	李雨柯	湖北省荆门市沙洋县	五里铺镇赵集村	丁秀芳	13277642511	1	1	0	1	1	1	1	2	68	45	0	9	0	0	0
416	SY0203	杜三峡	李雨柯	湖北省荆门市沙洋县	五里铺镇赵集村	赵德茂	18972883645	2	1	0	2	2	1	1	1	65	40	0	9	0	0	0
417	SY0204	杜三峡	李雨柯	湖北省荆门市沙洋县	五里铺镇赵集村	杨宏菊	18872872986	5	2	0	4	3	2	1	2	44	24	0	9	0	0	0	1	1	47	27	0	9	0	6	1
418	SY0205	杜三峡	李雨柯	湖北省荆门市沙洋县	五里铺镇赵集村	叶红胜	13657157523	6	2	0	5	3	1	1	1	73	30	0	9	0	0	0
419	SY0224	陈杰	李雨柯	湖北省荆门市沙洋县	五里铺镇赵集村	赵辉远	13607261072	2	2	2	2	2	2	1	1	80	65	0	6	0	0	0	2	2	77	60	0	3	0	0	0
420	SY0301	杜三峡	李雨柯	湖北省荆门市沙洋县	后港镇李台村	谭年生	13197131006	3	1	0	1	1	1	1	1	70	50	0	6	0	0	0
421	SY0302	杜三峡	李雨柯	湖北省荆门市沙洋县	后港镇李台村	张以才	13886906611	4	0	1	2	3	2	1	1	55	30	0	9	1	12	1
422	SY0303	杜三峡	李雨柯	湖北省荆门市沙洋县	后港镇李台村	王红忠	13997936049	3	1	0	2	1	1	1	1	50	30	1	9	0	0	0
423	SY0304	杜三峡	李雨柯	湖北省荆门市沙洋县	后港镇李台村	文蹈	13677243988	3	0	0	1	3	1	1	1	48	27	0	12	1	12	1
424	SY0401	杜三峡	李雨柯	湖北省荆门市沙洋县	后港镇韩场村	罗德香	18086288309	3	0	0	2	2	1	1	2	53	30	1	9	0	3	1
425	SY0402	杜三峡	李雨柯	湖北省荆门市沙洋县	后港镇韩场村	张方彪	13385247348	4	0	0	2	4	2	1	1	60	40	0	9	1	12	1	2	2	55	35	0	9	0	0	0
426	SY0403	杜三峡	李雨柯	湖北省荆门市沙洋县	后港镇韩场村	王道安	13237283365	5	1	0	2	4	2	1	1	65	40	0	6	1	12	1	2	2	61	40	0	6	0	0	0
427	SY0404	杜三峡	李雨柯	湖北省荆门市沙洋县	后港镇韩场村	秦生贵	15271789368	5	1	0	2	2	2	1	1	53	30	1	9	0	3	1	2	2	50	30	1	9	0	0	0
428	SY0405	杜三峡	李雨柯	湖北省荆门市沙洋县	后港镇韩场村	付意强	13886928647	4	0	0	2	2	2	1	1	54	35	0	9	0	2	1	2	2	50	35	0	9	0	6	0
429	SY0406	杜三峡	李雨柯	湖北省荆门市沙洋县	后港镇韩场村	熊加林	15827869833	3	2	0	3	2	1	1	1	58	35	0	9	0	0	0
430	SY0407	杜三峡	李雨柯	湖北省荆门市沙洋县	后港镇韩场村	董治云	13886933937	4	2	0	2	4	2	1	1	75	50	0	12	0	3	2	2	2	72	50	0	0	0	0	0
431	SY0501	杜三峡	李雨柯	湖北省荆门市沙洋县	毛李镇毛李村	朱定贵	13297628837	2	2	0	2	2	2	1	1	68	45	0	12	0	0	0	2	2	68	45	1	6	0	0	0
432	SY0502	杜三峡	李雨柯	湖北省荆门市沙洋县	毛李镇毛李村	胡纪新	15872177001	6	2	0	2	4	2	1	1	69	45	1	6	0	0	0	2	2	70	45	0	0	0	0	0
433	SY0503	杜三峡	李雨柯	湖北省荆门市沙洋县	毛李镇毛李村	毛秀明	15971959403	4	0	0	2	2	2	1	1	49	20	0	9	0	1	2	2	2	46	20	0	6	0	1	5
434	SY0504	杜三峡	李雨柯	湖北省荆门市沙洋县	毛李镇毛李村	朱有付	15972676047	2	1	0	2	2	2	1	1	76	50	1	5	0	0	0	2	2	76	50	0	0	0	0	0
435	SY0505	杜三峡	李雨柯	湖北省荆门市沙洋县	毛李镇毛李村	朱代华	18062468695	3	0	0	2	3	2	1	1	56	26	1	9	0	0	0	2	2	55	25	0	6	0	1	1
436	SY0506	杜三峡	李雨柯	湖北省荆门市沙洋县	毛李镇毛李村	田运全	15071983349	2	2	0	2	2	2	1	1	76	55	0	6	0	0	0	2	2	75	54	0	6	0	0	0
437	JS0901	陈杰	李雨柯	湖北省荆门市京山市	石龙镇五姊山村	曾令龙	15971954176	5	1	0	3	2	2	1	1	53	38	0	9	0	3	1	2	2	52	38	1	9	0	0	0
438	JS0902	陈杰	李雨柯	湖北省荆门市京山市	石龙镇五姊山村	郑火生	15972605979	2	0	0	2	2	1	1	1	50	28	0	9	0	3	1
439	JS0903	陈杰	李雨柯	湖北省荆门市京山市	石龙镇五姊山村	毕秋林	13872948691	3	0	0	2	2	2	1	1	52	35	1	9	0	0	0	2	2	51	30	0	0	0	0	0
440	JS0904	陈杰	李雨柯	湖北省荆门市京山市	石龙镇五姊山村	何永林	15572689778	5	0	1	2	2	2	1	1	58	41	1	9	0	0	0	2	2	57	40	1	9	0	0	0
441	JS0905	陈杰	李雨柯	湖北省荆门市京山市	石龙镇五姊山村	毕海秀	13774035830	5	0	1	2	2	2	1	2	58	40	1	9	0	0	0	2	1	60	40	0	6	0	0	0
442	XS0341	王淇	刘恩玲	湖北省黄冈市浠水县	清泉镇三台山村	司海建	15007252820	9	2	0	4	6	4	1	1	43	8	0	11	1	5	1	2	2	40	8	0	8	0	5	2	4	2	65	45	0	0	0	0	0	4	1	71	50	1	6	1	0	0
443	XS0541	王淇	刘恩玲	湖北省黄冈市浠水县	关口镇长流村	郭支明	13409773686	3	0	0	1	3	1	1	1	60	40	0	12	1	5	1
444	XS0542	王淇	刘恩玲	湖北省黄冈市浠水县	关口镇长流村	郭定容	13544893460	3	0	0	2	2	2	1	2	50	30	0	6	0	0		2	1	53	30	1	6	0	0
445	XS0543	王淇	刘恩玲	湖北省黄冈市浠水县	关口镇长流村	南美容	13647137849	5	1	0	2	3	1	1	2	60	40	0	6	0	0
446	XS0544	王淇	刘恩玲	湖北省黄冈市浠水县	关口镇长流村	黄象坤	13476627935	10	2	0	2	6	2	1	1	70	50	1	9	0	0		2	2	68	50	0	0	0	0
447	XS0545	王淇	刘恩玲	湖北省黄冈市浠水县	关口镇长流村	郭细爱	13476708926	10	0	1	10	6	2	1	2	55	35	1	2	0	0		2	1	60	40	1	5	0	0
448	XS0546	王淇	刘恩玲	湖北省黄冈市浠水县	关口镇长流村	黄象中	13635851498	10	2	0	2	6	2	1	1	74	50	0	3	0	0		2	2	69	50	0	0	0	0
449	XS0547	王淇	刘恩玲	湖北省黄冈市浠水县	关口镇长流村	郭炳怡	15971404846	6	2	0	3	3	2	1	1	68	50	0	6	1	0		2	2	66	45	0	0	0	0
450	XS0548	王淇	刘恩玲	湖北省黄冈市浠水县	关口镇长流村	胡凤春	15926793511	8	0	2	2	4	2	1	2	54	35	1	6	0	0		2	1	55	35	0	0	0	0
451	XS0549	王淇	刘恩玲	湖北省黄冈市浠水县	关口镇长流村	郭祥良	13971732416	10	2	1	7	6	2	1	1	66	45	0	9	0	0		2	2	63	45	0	0	0	0
452	XS0641	王淇	刘恩玲	湖北省黄冈市浠水县	洗马镇河东村	李保国	18971736695	6	0	2	6	3	2	1	1	58	40	0	6	0	5	1	2	2	58	40	0	6	0	0
453	XS0642	王淇	刘恩玲	湖北省黄冈市浠水县	洗马镇河东村	周旺姑	15072800230	7	0	1	3	6	2	1	2	55	35	0	9	0	0	1	1	55	35	0	9	0	5	1
454	XS0643	王淇	刘恩玲	湖北省黄冈市浠水县	洗马镇河东村	段六一	18162880459	5	2	0	2	4	2	1	2	60	40	0	6	0	0		2	1	63	40	0	12	0	0
455	XS0644	王淇	刘恩玲	湖北省黄冈市浠水县	洗马镇河东村	金兴旺	17786170087	5	2	0	3	4	2	1	1	66	46	0	6	0	0		2	2	66	46	1	2	0	0
456	TF0141	王淇	刘恩玲	湖北省黄冈市团风县	总路咀镇卢家榜村	王和全	18471809261	8	1	2	7	2	1	1	1	58	30	1	9	0	0
457	TF0142	王淇	刘恩玲	湖北省黄冈市团风县	总路咀镇卢家榜村	王植新	17771988834	6	1	0	1	1	1	1	1	70	40	0	9	0	0
458	TF0241	王淇	刘恩玲	湖北省黄冈市团风县	总路咀镇双河口村	孙平章	13871972780	5	0	0	2	2	2	1	1	60	40	0	12	1	5	1	2	2	61	40	1	12	0	0
459	TF0242	王淇	刘恩玲	湖北省黄冈市团风县	总路咀镇双河口村	余启忠	18871339763	5	2	0	2	1	1	1	1	69	50	1	6	0	0
460	TF0243	王淇	刘恩玲	湖北省黄冈市团风县	总路咀镇双河口村	余爱姆	17096759308	7	3	4	3	2	1	1	1	71	50	0	6	0	0
461	TF0245	王淇	刘恩玲	湖北省黄冈市团风县	总路咀镇双河口村	易成金	18062827007	4	1	0	2	2	2	1	1	35	20	0	9	0	5	3	4	1	73	55	0	3	0	0
462	TF0244	王淇	刘恩玲	湖北省黄冈市团风县	总路咀镇双河口村	孙明义	12517261914	5	2	0	2	2	2	1	1	72	55	1	0	0	0		2	2	68	50	1	6	0	0
463	TF0341	王淇	刘恩玲	湖北省黄冈市团风县	马曹庙镇大路岗村	吕旺清	15672663591	6	0	1	6	4	2	1	2	59	30	0	0	0	0		2	1	62	30	1	6	0	0
464	TF0342	王淇	刘恩玲	湖北省黄冈市团风县	马曹庙镇大路岗村	肖天元	15907255869	6	0	1	6	4	2	1	1	60	40	0	12	0	0		2	2	62	40	0	9	0	0
465	TF0343	王淇	刘恩玲	湖北省黄冈市团风县	马曹庙镇大路岗村	谭仁华	15572353958	8	1	0	1	1	1	1	1	66	8	1	12	0	4	4
466	TF0441	王淇	刘恩玲	湖北省黄冈市团风县	马曹庙镇桥子畈村	张桂英	61712645	6	2	0	2	4	1	1	2	77	50	1	0	0	0
467	TF0442	王淇	刘恩玲	湖北省黄冈市团风县	马曹庙镇桥子畈村	程仁先	18971722537	7	0	0	4	3	1	1	2	59	40	0	9	0	0
468	TF0443	王淇	刘恩玲	湖北省黄冈市团风县	马曹庙镇桥子畈村	邓安仁	15377136620	10	2	1	4	4	2	1	1	73	50	1	5	0	0		2	2	65	45	0	0	0	0
469	TF0541	王淇	刘恩玲	湖北省黄冈市团风县	马曹庙镇沙河图村	孙炳章	18062865327	5	0	0	2	2	1	1	1	61	40	0	9	0	0
470	TF0542	王淇	刘恩玲	湖北省黄冈市团风县	马曹庙镇沙河图村	杜桂连	18163088156	4	1	0	1	1	1	1	2	70	50	1	0	0	0
471	TF0543	王淇	刘恩玲	湖北省黄冈市团风县	马曹庙镇沙河图村	樊国喜		7	0	1	4	3	2	1	1	60	40	1	9	0	0		2	2	60	40	0	12	0	0
472	TF0544	王淇	刘恩玲	湖北省黄冈市团风县	马曹庙镇沙河图村			10	1	2	4	4	2	1	2	56	35	0	9	0	0		2	1	62	40	1	6	0	0
473	TF0641	王淇	刘恩玲	湖北省黄冈市团风县	淋山河镇孙家山村	周春生	13237205168	6	0	1	2	2	2	1	2	59	45	1	0	0	0		2	1	63	50	1	6	0	0
474	TF0642	王淇	刘恩玲	湖北省黄冈市团风县	淋山河镇孙家山村	孙来甫	13487045686	9	2	2	2	6	2	1	1	65	45	0	12	0	0		2	2	68	45	1	6	0	0
475		王淇	刘恩玲	湖北省黄冈市团风县		舒少斌	15072797618	3	1	0	3	3	1	1	1	58	25	0	9	0	0										0
476	XS0141	王淇	刘恩玲	湖北省黄冈市浠水县	兰溪镇盐客树村	李云学	13429911659	4	1	0	2	2	1	1	1	68	50	1	12	0	5	1
477	XS0142	王淇	刘恩玲	湖北省黄冈市浠水县	兰溪镇盐客树村	李如校	13477693249	9	2	2	5	6	2	1	1	67	50	1	6	0	5	1	2	2	66	50	1	0	0	0
478	XS0143	王淇	刘恩玲	湖北省黄冈市浠水县	兰溪镇盐客树村	冯欣荣	18871179056	5	2	0	5	4	2	1	1	73	55	0	9	0	0		2	2	73	55	1	6	0	0
479	XS0144	王淇	刘恩玲	湖北省黄冈市浠水县	兰溪镇盐客树村	范益安	18971701531	9	1	1	5	3	2	1	1	59	40	1	12	1	5	1	2	2	58	40	1	6	0	0
480	XS0241	王淇	刘恩玲	湖北省黄冈市浠水县	兰溪镇三泉村	孙加义	13986557412	6	2	0	2	4	2	1	1	68	50	0	9	0	0		2	2	68	50	1	0	0	0
481	XS0242	王淇	刘恩玲	湖北省黄冈市浠水县	兰溪镇三泉村	孙加元	13971732518	5	1	0	3	3	1	1	1	60	40	0	9	0	0
482	XS0243	王淇	刘恩玲	湖北省黄冈市浠水县	兰溪镇三泉村	朱益祥	18271532203	9	2	0	2	2	1	1	1	69	50	0	6	0	0
483	XS0244	王淇	刘恩玲	湖北省黄冈市浠水县	兰溪镇三泉村	孙传汲	15582523743	5	2	0	2	5	2	1	1	75	55	0	2	0	0		2	2	80	58	0	0	0	0
484	XS0424	刘恩玲	刘恩玲	湖北省黄冈市浠水县	关口镇凉亭村	郭锡武	15926701733	8	2	1	5	4	2	1	1	73	50	0	8	0	0		2	2	73	50	1	5	0	0
485	XS0624	刘恩玲	刘恩玲	湖北省黄冈市浠水县	洗马镇河东村	何树华	13872043865	2	2	0	2	2	2	1	1	74	8	0	8	0	0		2	2	74	8	0	2	0	0
486	XS0622	刘恩玲	刘恩玲	湖北省黄冈市浠水县	洗马镇河东村	何南山	13085219956	6	0	1	5	2	3	1	1	60	39	1	5	0	3	1	2	2	59	39	0	5	0	0		3	1	38	1	0	9	0	0
487	XS0625	刘恩玲	刘恩玲	湖北省黄冈市浠水县	洗马镇河东村	叶建兴	13476710642	3	0	0	2	3	2	1	1	55	30	1	8	0	2	1	2	2	54	30	0	5	0	0	0
488	XS0623	刘恩玲	刘恩玲	湖北省黄冈市浠水县	洗马镇河东村	陈玉平	13409706541	3	0	0	2	3	2	1	2	52	10	0	8	0	0		2	1	52	25	0	5	0	0
489	XS0621	刘恩玲	刘恩玲	湖北省黄冈市浠水县	洗马镇河东村	叶贵红	18971736562	4	0	0	4	4	2	1	2	52	30	0	4	0	0		2	1	55	30	0	4	0	6	1
490	XS04213	刘恩玲	刘恩玲	湖北省黄冈市浠水县	关口镇凉亭村	郭春明	17371359436	6	0	1	2	5	2	1	1	55	30	0	5	0	0		2	2	55	30	0	3	0	0
491	XS04212	刘恩玲	刘恩玲	湖北省黄冈市浠水县	关口镇凉亭村	郭又明	13597562974	3	0	0	2	3	2	1	1	60	43	0	8	0	4	1	2	2	58	30	0	8	0	0
492	XS04211	刘恩玲	刘恩玲	湖北省黄冈市浠水县	关口镇凉亭村	柴风群	13476596891	4	0	0	2	4	2	1	2	58	30	0	9	0	0		2	1	58	30	1	9	0	0
493	XS04210	刘恩玲	刘恩玲	湖北省黄冈市浠水县	关口镇凉亭村	郭双元	13872018529	3	0	0	2	3	2	1	1	59	40	0	8	0	0		2	2	58	40	0	5	0	0
494	XS0429	刘恩玲	刘恩玲	湖北省黄冈市浠水县	关口镇凉亭村	郭成生	13476614640	10	0	3	2	6	1	1	1	61	20	0	8	0	0
495	XS0225	刘恩玲	刘恩玲	湖北省黄冈市浠水县	兰溪镇三泉村	范菊花	13477646705	4	0	0	2	4	2	1	2	55	30	0	8	0	0		2	1	56	30	0	12	0	0
496	XS0224	刘恩玲	刘恩玲	湖北省黄冈市浠水县	兰溪镇三泉村	张丙言	13669034880	1	0	0	1	1	1	1	1	77	50	0	0	0	0
497	XS0221	刘恩玲	刘恩玲	湖北省黄冈市浠水县	兰溪镇三泉村	张春梅		6	0	0	4	4	2	1	2	56	35	0	0	0	0		2	1	57	35	0	3	0	0
498	XS0223	刘恩玲	刘恩玲	湖北省黄冈市浠水县	兰溪镇三泉村	张瑞兰	13227362761	2	0	0	0	2	2	1	1	81	60	1	5	0	0		2	2	78	60	1	0	0	0
499	XS0222	刘恩玲	刘恩玲	湖北省黄冈市浠水县	兰溪镇三泉村	何大玲		5	0	1	3	4	2	1	2	56	30	0	5	0	0		2	1	56	30	0	8	0	3	1
500	XS0122	刘恩玲	刘恩玲	湖北省黄冈市浠水县	兰溪镇盐客树村	徐光德		2	2	0	2	2	2	1	1	74	40	1	3	0	0		2	2	68	40	0	6	0	0
501	XS0124	刘恩玲	刘恩玲	湖北省黄冈市浠水县	兰溪镇盐客树村	徐巧云	13246836484	6	2	2	5	4	2	1	2	68	30	1	8	0	0		2	1	72	40	1	0	0	0
502	XS0125	刘恩玲	刘恩玲	湖北省黄冈市浠水县	兰溪镇盐客树村	邓冬梅		2	0	0	2	2	2	1	2	59	40	0	0	0	0		2	1	60	40	0	2	0	0
503	XS0123	刘恩玲	刘恩玲	湖北省黄冈市浠水县	兰溪镇盐客树村	李汉华		5	2	1	4	2	2	1	1	75	50	1	3	0	0		2	2	70	50	0	8	0	0
504	XS0121	刘恩玲	刘恩玲	湖北省黄冈市浠水县	兰溪镇盐客树村	李彩华	18271544339	6	0	1	6	4	3	1	2	58	25	0	0	0	0		2	1	58	25	0	12	0	3	2	3	1	34	10	0	12	0	4	2
505	XS0423	刘恩玲	刘恩玲	湖北省黄冈市浠水县	关口镇凉亭村	郭国华	15072801046	6	1	1	3	5	2	1	1	56	40	0	8	0	4	1	2	2	50	30	0	5	0	0
506	XS0422	刘恩玲	刘恩玲	湖北省黄冈市浠水县	关口镇凉亭村	郭孝刚	18771661085	3	1	0	2	1	1	1	1	70	50	0	0	0	0		2	2	64	40	1	0	0	0
507	XS0421	刘恩玲	刘恩玲	湖北省黄冈市浠水县	关口镇凉亭村	郭志元	13409849943	5	2	0	4	2	1	1	1	70	50	0	5	0	0		2	2	67	40	1	5	0	0
508	XS0227	刘恩玲	刘恩玲	湖北省黄冈市浠水县	清泉镇三泉村	刘勤秀	19947700771	6	1	0	4	4	2	1	2	60	40	0	6	0	0		2	1	66	40	0	12	0	2	12
509	XS0321	刘恩玲	刘恩玲	湖北省黄冈市浠水县	清泉镇三台山村	易冬明	13593683191	4	1	0	4	2	2	1	1	52	15	0	12	0	0		2	2	47	15	0	8	0	0
510	XS0226	刘恩玲	刘恩玲	湖北省黄冈市浠水县	清泉镇三泉村	胡来香	18986521367	5	0	0	3	4	2	1	2	58	25	0	8	0	8	1	2	1	59	25	1	8	0	0
511	XS0427	刘恩玲	刘恩玲	湖北省黄冈市浠水县	关口镇凉亭村	郭支元	13476710124	6	2	0	3	2	1	1	1	67	40	1	12	0	0		2	2	67	40	0	8	0	0
512	XS0428	刘恩玲	刘恩玲	湖北省黄冈市浠水县	关口镇凉亭村	郭根迎	15998030059	6	2	1	6	3	1	1	1	71	40	1	5	0	0		2	2	68	40	1	2	0	0
513	XS0426	刘恩玲	刘恩玲	湖北省黄冈市浠水县	关口镇凉亭村	熊秋明	15997355184	5	1	0	3	3	1	1	2	67	40	0	0	0	0
514	XS0425	刘恩玲	刘恩玲	湖北省黄冈市浠水县	关口镇凉亭村	郭希明	15098030896	8	2	0	2	1	1	1	1	67	40	0	8	0	0		2	2	67	40	1	0	0	0
515		刘恩玲	刘恩玲	湖北省黄冈市团风县		王光龙	13217232681	6	0	1	2	5	2	1	1	55	11	0	8	0	0		2	2	50	11	0	6	0	3	1
516	TF0621	刘恩玲	刘恩玲	湖北省黄冈市团风县	淋山河镇孙家山村	孙华锋	15391636022	5	0	1	3	4	2	1	1	64	35	0	9	1	0		2	2	60	30	0	7	0	0
517	TF0321	刘恩玲	刘恩玲	湖北省黄冈市团风县	马曹庙镇大路岗村	周峰	13469888271	8	1	2	2	5	1	1	1	65	20	0	12	0	0
518	TF0322	刘恩玲	刘恩玲	湖北省黄冈市团风县	马曹庙镇大路岗村	周晓峰	15972877068	6	2	0	4	2	2	1	1	48	5	0	5	0	9	45	2	2	48	10	0	8	0	0
519	TF0421	刘恩玲	刘恩玲	湖北省黄冈市团风县	马曹庙镇桥子畈村	易春连	18995758109	2	0	0	2	2	2	1	2	68	55	1	0	0	0		2	1	71	60	1	0	0	0
520	TF0422	刘恩玲	刘恩玲	湖北省黄冈市团风县	马曹庙镇桥子畈村	王冬梅		6	1	0	4	4	2	1	2	64	40	1	0	0	0		2	1	69	45	1	5	0	3	1
521	TF0423	刘恩玲	刘恩玲	湖北省黄冈市团风县	马曹庙镇桥子畈村	肖仁章	1998686850	7	2	0	2	4	2	1	1	71	50	0	0	0	0		2	2	68	50	1	0	0	0
522	TF0521	刘恩玲	刘恩玲	湖北省黄冈市团风县	马曹庙镇沙河图村	樊树生		5	2	0	2	4	2	1	1	80	60	1	2	0	0		2	2	75	55	0	1	0	0
523	TF0522	刘恩玲	刘恩玲	湖北省黄冈市团风县	马曹庙镇沙河图村	朱海元	15327711817	4	1	0	2	4	2	1	1	65	35	1	6	0	3	1	2	2	64	35	1	5	0	0
524	TF0523	刘恩玲	刘恩玲	湖北省黄冈市团风县	马曹庙镇沙河图村	熊会元	13647130690	7	0	1	5	4	1	1	1	56	25	0	9	0	10	1
525	TF0524	刘恩玲	刘恩玲	湖北省黄冈市团风县	马曹庙镇沙河图村	陈连香	18271581159	6	1	1	4	4	2	1	2	58	16	0	5	0	0		2	1	65	14	1	9	0	10	1
526	TF0121	刘恩玲	刘恩玲	湖北省黄冈市团风县	总路咀镇卢家榜村	卢友明		6	1	1	4	3	1	1	1	60	40	0	9	0	0
527	TF0122	刘恩玲	刘恩玲	湖北省黄冈市团风县	总路咀镇卢家榜村	王海丰		6	1	1	6	3	2	1	1	64	40	1	9	0	0		2	2	61	40	0	1	0	0
528	TF0123	刘恩玲	刘恩玲	湖北省黄冈市团风县	总路咀镇卢家榜村	施会斌		10	2	2	2	2	1	1	1	70	50	0	6	0	0
529	TF0124	刘恩玲	刘恩玲	湖北省黄冈市团风县	总路咀镇卢家榜村	施友四		5	1	2	4	3	1	1	1	70	40	0	5	0	0
530	TF0221	刘恩玲	刘恩玲	湖北省黄冈市团风县	总路咀镇双河口村	陈细香		4	0	0	3	3	2	1	2	54	15	0	2	0	0		2	1	59	15	1	9	0	0
531	TF0222	刘恩玲	刘恩玲	湖北省黄冈市团风县	总路咀镇双河口村	汪锦章		5	1	1	4	4	2	1	1	69	50	1	0	0	2	1	2	2	58	40	1	9	0	0
532	TF0223	刘恩玲	刘恩玲	湖北省黄冈市团风县	总路咀镇双河口村	夏佑枝		5	1	1	3	4	2	1	2	53	20	0	6	0	0		2	1	63	30	0	0	0	0
533	TF0224	刘恩玲	刘恩玲	湖北省黄冈市团风县	总路咀镇双河口村	徐金枝		9	0	1	9	6	4	1	2	56	30	0	4	0	0		2	1	57	30	0	6	0	0		3	1	34	10	1	6	0	6	5	3	1	31	7	1	5	0	6	5
534	TF0225	刘恩玲	刘恩玲	湖北省黄冈市团风县	总路咀镇双河口村	熊丽英		5	1	0	2	4	2	1	2	50	25	0	6	0	0		2	1	52	25	0	6	0	3	1
535	TF0226	刘恩玲	刘恩玲	湖北省黄冈市团风县	总路咀镇双河口村	孙耀华		2	0	0	2	2	2	1	1	64	30	1	9	0	4	2	2	2	63	30	1	6	0	0
536	TF0101	桑贤策	桑贤策	湖北省黄冈市团风县	总路咀镇卢家榜村	王政轨	13476724362	2	1	0	2	2	2	1	1	65	50	0	9	0	2	1	2	2	62	45	0	0	0	0	0
537	TF0102	桑贤策	桑贤策	湖北省黄冈市团风县	总路咀镇卢家榜村	施子方		4	2	0	3	2	1	1	1	81	65	1	3	1	4	1
538	TF0103	桑贤策	桑贤策	湖北省黄冈市团风县	总路咀镇卢家榜村	王财清		3	0	0	2	1	1	1	1	54	35	1	0	0	3	1
539	TF0201	桑贤策	桑贤策	湖北省黄冈市团风县	总路咀镇双河口村	孙国华		5	2	0	1	3	1	1	1	75	60	1	6	0	0
540	TF0202	桑贤策	桑贤策	湖北省黄冈市团风县	总路咀镇双河口村	余德安		6	1	0	4	4	1	1	1	80	65	0	0	0	0
541	TF0203	桑贤策	桑贤策	湖北省黄冈市团风县	总路咀镇双河口村	余水政		2	2	0	1	1	1	1	1	69	55	0	12	0	0
542	TF0204	桑贤策	桑贤策	湖北省黄冈市团风县	总路咀镇双河口村	余国清	15997395050	3	1	0	2	2	2	1	1	65	50	1	12	0	0		2	2	63	48	1	7	0	12	2
543	TF0205	桑贤策	桑贤策	湖北省黄冈市团风县	总路咀镇双河口村	汪金芝		4	1	0	1	2	1	1	2	76	60	1	0	0	0
544	TF0206	桑贤策	桑贤策	湖北省黄冈市团风县	总路咀镇双河口村	李静	13477683659	4	0	0	4	3	2	1	2	53	38	0	3	0	0		2	1	54	40	0	6	0	8	2
545	TF0301	桑贤策	桑贤策	湖北省黄冈市团风县	马曹庙镇大路岗村	易细枝	17371312797	7	0	1	2	6	2	1	1	56	35	0	2	0	0		2	2	57	35	0	12	1	0
546	TF0302	桑贤策	桑贤策	湖北省黄冈市团风县	马曹庙镇大路岗村	何鹏	13476590221	6	2	0	4	1	1	1	1	46	20	0	9	0	2	2
547	TF0303	桑贤策	桑贤策	湖北省黄冈市团风县	马曹庙镇大路岗村	包春莺		4	0	1	2	3	1	1	1	60	40	0	9	0	0
548	TF0401	桑贤策	桑贤策	湖北省黄冈市团风县	马曹庙镇桥子畈村	肖继光	18607255800	7	2	0	4	3	3	1	1	41	20	0	12	1	0		4	1	68	50	0	12	0	0		4	2	67	45	0	6	0	0
549	TF0402	桑贤策	桑贤策	湖北省黄冈市团风县	马曹庙镇桥子畈村	贾少文	13487045227	4	0	1	3	2	1	1	1	55	40	0	9	0	12	1
550	TF0403	桑贤策	桑贤策	湖北省黄冈市团风县	马曹庙镇桥子畈村	吕世凡	13477652778	5	0	0	3	3	2	1	1	51	30	1	9	0	2	1	2	2	53	30	0	9	0	0
551	TF0404	桑贤策	桑贤策	湖北省黄冈市团风县	马曹庙镇桥子畈村	肖天伦	13469941246	2	2	0	2	2	2	1	1	70	50	0	12	0	12	1	2	2	63	45	0	9	0	0
552	TF0501	桑贤策	桑贤策	湖北省黄冈市团风县	马曹庙镇沙河图村	刘金安		7	1	0	4	3	2	1	1	68	50	0	0	0	0		2	2	59	45	0	0	0	0
553	TF0502	桑贤策	桑贤策	湖北省黄冈市团风县	马曹庙镇沙河图村	孙贵子	18871339719	3	0	0	2	3	2	1	2	60	40	0	0	0	0		2	1	62	45	1	12	1	0
554	TF0503	桑贤策	桑贤策	湖北省黄冈市团风县	马曹庙镇沙河图村	卢金平	13257174982	3	0	0	1	2	1	1	1	60	45	0	12	0	0
555	TF0504	桑贤策	桑贤策	湖北省黄冈市团风县	马曹庙镇沙河图村	卢友华	13677134879	4	1	0	1	3	1	1	1	82	60	1	6	0	0
556	TF0601	桑贤策	桑贤策	湖北省黄冈市团风县	淋山河镇孙家山村	夏艮来	13871970362	4	0	0	2	2	1	1	1	52	30	0	12	1	0
557	TF0602	桑贤策	桑贤策	湖北省黄冈市团风县	淋山河镇孙家山村	孙水清	13476591858	5	2	0	2	4	2	1	1	68	3	0	12	0	0
558		桑贤策	桑贤策	湖北省黄冈市团风县	团风镇安阳村	吴应华	13329949727	3	0	0	3	3	1	1	1	53	11	0	9	0	0
559		桑贤策	桑贤策	湖北省黄冈市团风县	团风镇郧阳村	王有堂	18986510359	6	1	1	3	4	2	1	1	53	21	0	9	0	0		2	2	53	21	0	9	0	0
560	XS0101	桑贤策	桑贤策	湖北省黄冈市浠水县	兰溪镇盐客树村	李海波		6	1	0	4	4	2	1	1	65	45	0	6	0	0		2	2	64	45	0	0	0	0
561	XS0102	桑贤策	桑贤策	湖北省黄冈市浠水县	兰溪镇盐客树村	李中良	13476662288	3	0	0	3	3	2	1	1	57	40	0	6	0	0		2	2	52	30	0	6	0	0
562	XS0103	桑贤策	桑贤策	湖北省黄冈市浠水县	兰溪镇盐客树村	程小文	18871303336	5	0	1	4	4	2	1	1	56	40	0	12	1	0		2	2	52	30	0	6	0	0
563	XS0104	桑贤策	桑贤策	湖北省黄冈市浠水县	兰溪镇盐客树村	胡秋平	15971335686	3	0	0	2	2	2	1	1	59	41	0	12	1	0		2	2	56	40	0	6	0	0
564	XZ0102	闫阿倩	孙彬涵	湖北省襄阳市襄州区	张家集镇聂岗村	张庆恩	13667251369	6	1	1	4	3	1	1	1	69	30	1	3	0	0	0
565	XZ0103	闫阿倩	孙彬涵	湖北省襄阳市襄州区	张家集镇聂岗村	张国庆	13826971563	4	2	0	2	2	2	1	2	51	20	0	2	0	4	1	2	1	52	20	0	0	0	5	1
566	XZ0104	闫阿倩	孙彬涵	湖北省襄阳市襄州区	张家集镇聂岗村	邓霞	18729503413	5	0	0	3	2	2	1	2	55	23	1	9	0	0	0	2	1	54	23	1	9	0	3	1
567	XZ0105	闫阿倩	孙彬涵	湖北省襄阳市襄州区	张家集镇聂岗村	路文	13725676329	7	1	0	5		2	1	1	59	30	0	9	0	4	5	2	2	59	30	1	6	0	0
568	XZ0106	闫阿倩	孙彬涵	湖北省襄阳市襄州区	张家集镇聂岗村	杨贵文	13767253638	2	2	0	2	1	1	1	1	69	39	1	9	0	0	0
569	XZ0107	闫阿倩	孙彬涵	湖北省襄阳市襄州区	张家集镇聂岗村	路东生	18726372625	3	0	0	2	2	2	1	1	58	38	0	9	0	3	5	2	2	57	30	1	6	0	0	0
570	XZ0108	闫阿倩	孙彬涵	湖北省襄阳市襄州区	张家集镇聂岗村	邓家伟	18672353171	3	0	0	2	2	2	1	1	59	35	0	6	0	0	0	2	2	50	25	1	0	0	0	0
571	ZY0101	闫阿倩	孙彬涵	湖北省襄阳市枣阳市	兴隆镇灵庙村	王明田	13667281361	6	0	2	4	3	2	1	1	61	40	0	6	0	0	0	2	2	62	42	0	9	0	0	0
572	ZY0102	闫阿倩	孙彬涵	湖北省襄阳市枣阳市	兴隆镇灵庙村	牛发友	13476444726	6	0	1	1	3	1	1	1	63	40	0	9	1	0	0
573	ZY0103	闫阿倩	孙彬涵	湖北省襄阳市枣阳市	兴隆镇灵庙村	陈天国	13462378911	7	0	1	2	2	2	1	1	57	39	0	9	0	2	1	2	2	59	39	0	12	0	0	0
574	ZY0104	闫阿倩	孙彬涵	湖北省襄阳市枣阳市	兴隆镇灵庙村	梅春海	18371055301	6	2	0	3	4	2	1	1	67	40	0	6	1	0	0	2	2	66	40	0	12	0	0	0
575		闫阿倩	孙彬涵	湖北省襄阳市枣阳市	兴隆镇灵庙村	王家立	15667231986	8	0	2	5	4	1	1	1	56	30	1	9	0	0	0
576	XZ0109	孙彬涵	孙彬涵	湖北省襄阳市襄州区	张家集镇聂岗村	张小元	13227533465	5	1	0	3	2	2	1	1	52	30	0	9	0	0	0	2	2	48	25	0	6	0	0	0
577	XZ0110	孙彬涵	孙彬涵	湖北省襄阳市枣阳市	张家集镇聂岗村	董乐义，无人机打药	13797612984	2	0	0	2	2	0	1	1	62	40	1	9	0	0		2	2	48	18	1	9	0	0
578	XZ0111	孙彬涵	孙彬涵	湖北省襄阳市襄州区	张家集镇聂岗村	张根林	13476362040	4	1	0	3	2	1	1	1	48	3	0	6	0	0	0
579	XZ0125	孙彬涵	孙彬涵	湖北省襄阳市襄州区	张家集镇聂岗村	路克明	2966196	3	2	0	3	3	2	1	1	70	43	1	9	0	0		2	2	67	43	1	9	0	0
580	XZ0305	孙彬涵	孙彬涵	湖北省襄阳市襄州区	张家集镇官沟村	王天平	13871778927	4	0	0	2	4	2	1	1	57	40	1	9	0	1.5	3	2	2	57	40	0	6	0	0
581	XZ0306	孙彬涵	孙彬涵	湖北省襄阳市襄州区	张家集镇官沟村	李老根	15107277452	4	1	0	2	4	2	1	1	65	40	0	9	0	4	1	2	2	57	32	0	0	0	0
582	XZ0307	孙彬涵	孙彬涵	湖北省襄阳市襄州区	张家集镇官沟村	梁德英	19171221270	4	0	0	1	4	1	1	2	62	37	0	12	1	12	1	2	1	60	35	0	9	0	12	3
583	XZ0308	孙彬涵	孙彬涵	湖北省襄阳市襄州区	张家集镇官沟村	梁志军	13476317366	3	0	0	2	2	2	1	1	55	35	1	15	1	12	1	2	2	54	30	0	9	0	9	3
584	XZ0309	孙彬涵	孙彬涵	湖北省襄阳市襄州区	张家集镇官沟村	韩水群		2	0	0	2	2	2	1	2	56	36	1	6	0	0		2	1	57	37	0	9	0	12	2
585	XZ0310	孙彬涵	孙彬涵	湖北省襄阳市襄州区	张家集镇官沟村	李	17871620865	5	0	0	5	2	2	1	1	50	30	0	6	0	12	1	2	2	52	32	0	9	0	12	1
586	XZ0404	孙彬涵	孙彬涵	湖北省襄阳市襄州区	峪山镇黄湾村	程先兴	13886249539	2	0	0	1	1	1	1	1	63	43	0	9	0	2	1
587	XZ0405	孙彬涵	孙彬涵	湖北省襄阳市襄州区	峪山镇黄湾村	黄明正	13986389767	2	2	0	2	1	1	1	1	68	30	0	9	0	0
588	XZ0406	孙彬涵	孙彬涵	湖北省襄阳市襄州区	峪山镇黄湾村	黄明文	13339818109	3	2	0	2	2	2	1	1	66	46	0	9	0	0		2	2	66	46	0	6	0	0
589	XZ0407	孙彬涵	孙彬涵	湖北省襄阳市襄州区	峪山镇黄湾村	黄河	19171645582	4	0	0	2	2	2	1	1	52	32	0	9	0	12	1	2	2	52	32	1	9	0	0
590	XZ0506	孙彬涵	孙彬涵	湖北省襄阳市襄州区	峪山镇毕岗村	杨立国	18707279778	6	0	0	4	4	2	1	1	57	40	0	9	0	1	1	2	2	55	37	1	12	0	0
591	XZ0507	孙彬涵	孙彬涵	湖北省襄阳市襄州区	峪山镇毕岗村	王二	15172603549	5	0	2	4	4	2	1	2	52	30	0	0	0	0		2	1	59	35	1	12	1	12	1
592	XZ0508	孙彬涵	孙彬涵	湖北省襄阳市襄州区	峪山镇毕岗村	毕金财	17871389436	5	0	1	3	4	2	1	1	52	36	0	6	0	1	5	2	2	52	36	0	9	0	0
593	XZ0613	孙彬涵	孙彬涵	湖北省襄阳市襄州区	峪山镇樊岗村	李明国	13797659241	5	0	0	2	4	2	1	1	63	43	0	12	0	5	3	2	2	64	44	1	12	0	0
594	XZ0614	孙彬涵	孙彬涵	湖北省襄阳市襄州区	峪山镇樊岗村	张教东	15872287242	6	0	1	6	4	1	1	1	53	35	1	6	0	0
595	XZ0615	孙彬涵	孙彬涵	湖北省襄阳市襄州区	峪山镇樊岗村	张教全		3	1	0	3	3	1	1	1	70	50	1	2	0	0
596	XZ0703	孙彬涵	孙彬涵	湖北省襄阳市襄州区	双沟镇韦庄村	毛春生	15071530243	2	2	0	2	2	2	1	1	70	50	1	3	0	6	5	2	2	66	46	1	6	0	0
597	XZ0704	孙彬涵	孙彬涵	湖北省襄阳市襄州区	双沟镇韦庄村	张朝信	15926894874	5	1	1	5	2	1	1	1	78	60	0	5	0	0
598	XZ0803	孙彬涵	孙彬涵	湖北省襄阳市襄州区	双沟镇程冢村	郝虎	18872594645	4	0	0	4	4	2	1	1	51	31	1	6	0	0		2	2	49	30	0	6	0	0
599	XZ0804	孙彬涵	孙彬涵	湖北省襄阳市襄州区	双沟镇程冢村	郝书华	15871041262	4	0	0	2	4	2	1	1	48	30	0	5	0	2	4	2	2	46	25	0	5	0	0
600	ZY0219	孙彬涵	孙彬涵	湖北省襄阳市枣阳市	兴隆镇冯岗村	丁正义		4	0	0	4	2	2	1	2	47	25	0	6	0	3	4	2	1	47	25	0	9	0	2.5	4
601	ZY0220	孙彬涵	孙彬涵	湖北省襄阳市枣阳市	兴隆镇冯岗村	谢正涛	18986392549	2	0	0	2	2	2	1	1	64	44	1	6	0	2	1	2	2	60	40	0	6	0	0
602	ZY0221	孙彬涵	孙彬涵	湖北省襄阳市枣阳市	兴隆镇冯岗村	黄启江	13094134478	3	0	0	3	3	2	1	1	50	30	0	6	0	6	2	2	2	47	27	0	6	0	6
603	ZY0222	孙彬涵	孙彬涵	湖北省襄阳市枣阳市	兴隆镇冯岗村	李兴保	18372277049	2	0	0	2	2	2	1	1	55	35	0	9	1	12	0	2	2	50	30	0	6	0	0
604	ZY0223	孙彬涵	孙彬涵	湖北省襄阳市枣阳市	兴隆镇冯岗村	刘发宴	15997302722	2	2	0	2	2	2	1	1	66	46	0	12	1	12	1	2	2	66	46	1	9	0	0
605	ZY0224	孙彬涵	孙彬涵	湖北省襄阳市枣阳市	兴隆镇冯岗村	胡银德	13257296874	5	1	1	5	2	1	1	1	66	46	1	4	0	0
606	ZY0225	孙彬涵	孙彬涵	湖北省襄阳市枣阳市	兴隆镇冯岗村	徐兴宝	15172654259	6	0	2	4	4	2	1	1	53	33	1	8	0	5	4	2	2	55	35	1	6	0	0
607	ZY0226	孙彬涵	孙彬涵	湖北省襄阳市枣阳市	兴隆镇冯岗村	王晓顺	15608677570	4	0	0	3	3	2	1	1	46	25	1	6	0	4	4	2	2	48	28	0	6	0	4	1
608	ZY0227	孙彬涵	孙彬涵	湖北省襄阳市枣阳市	兴隆镇冯岗村	王君胜	13487132263	9	0	2	5	6	2	1	1	59	24	0	9	0	2.5	5	2	2	57	20	1	9	0	0
609	ZY0417	孙彬涵	孙彬涵	湖北省襄阳市枣阳市	兴隆镇大堰村	吴远修	15071513306	6	2	0	4	4	2	1	1	72	52	1	6	0	0		2	2	70	50	1	0	0	0
610	ZY0418	孙彬涵	孙彬涵	湖北省襄阳市枣阳市	兴隆镇大堰村	曹云洲	17371005561	6	0	2	4	4	2	1	1	59	39	1	9	0	3	5	2	2	58	38	1	6	0	0
611	ZY0515	孙彬涵	孙彬涵	湖北省襄阳市枣阳市	南城街道李家庄村	罗世敏	18972295262	6	2	1	5	3	2	1	2	71	51	1	9	0	0		2	1	69	50	0	9	0	0
612	ZY0515	孙彬涵	孙彬涵	湖北省襄阳市枣阳市	南城街道李家庄村	李永发	13277114485	6	0	2	4	4	2	1	1	56	36	0	9	0	3	5	2	2	57	35	0	9	0	0
613	ZY0601	孙彬涵	孙彬涵	湖北省襄阳市枣阳市	南城街道李家庄村	郑玉兰	18986319097	1	0	0	1	1	1	1	2	59	40	1	9	0	0.5	1
614	ZY0602	孙彬涵	孙彬涵	湖北省襄阳市枣阳市	南城街道李家庄村	王春学		7	2	0	2	2	2	1	1	67	47	1	9	0	0.1	1	2	2	66	46	1	0	0	0.25	1
615	ZY0603	孙彬涵	孙彬涵	湖北省襄阳市枣阳市	南城街道李家庄村	黄奎伦	18372282021	5	2	1	2	3	1	1	1	75	55	0	9	0	12	2
616	ZY0604	孙彬涵	孙彬涵	湖北省襄阳市枣阳市	南城街道李家庄村	李家骏	18371072306	4	1	0	3	2	1	1	1	46	1	0	15	1	12	1
617	ZY0702	孙彬涵	孙彬涵	湖北省襄阳市枣阳市	南城街道彭岗村	杨光强	17057624843	5	0	2	5	2	2	1	1	59	30	0	9	0	0		2	2	61	30	1	0	0	0
618	ZY0703	孙彬涵	孙彬涵	湖北省襄阳市枣阳市	南城街道彭岗村	彭学军	15392794009	2	1	0	2	2	2	1	1	64	35	0	12	1	12	1	2	2	65	35	0	9	0	0
619	ZY0704	孙彬涵	孙彬涵	湖北省襄阳市枣阳市	南城街道彭岗村	陶明锋	13235681195	3	1	0	3	2	2	1	1	44	24	0	9	0	3	4	2	2	44	24	0	6	0	0
620	ZY0803	孙彬涵	孙彬涵	湖北省襄阳市枣阳市	南城街道田畈村	马守英	15997247058	10	0	1	6	6	2	1	2	60	35	1	6	0	0		2	1	60	35	1	6	1	12	1
621	SY0220	陈杰	孙彬涵	湖北省荆门市沙洋县	五里铺镇赵集村	任雨芹	13886914656	8	2	1	8	4	3	1	2	34	14	0	12	1	0		2	1	38	16	0	9	0	6	1	4	1	60	40	0	9	0	1	1
622	SY0221	陈杰	孙彬涵	湖北省荆门市沙洋县	五里铺镇赵集村	李丽萍	15717826558	5	2	0	4	4	4	1	2	45	20	0	12	1	0		2	1	48	20	0	9	0	1	4
623	SY0222	陈杰	孙彬涵	湖北省荆门市沙洋县	五里铺镇赵集村	杨运虎	15972674582	8	2	1	3	6	2	1	1	70	35	0	6	0	1	1	2	2	65	30	0	9	0	1	1
624	SY0223	陈杰	孙彬涵	湖北省荆门市沙洋县	五里铺镇赵集村	朱新明	13797992093	5	0	0	2	4	2	1	1	64	45	0	9	1	0	0	2	2	60	45	1	9	0	0
625	SY0122	陈杰	孙彬涵	湖北省荆门市沙洋县	五里铺镇陈池村	陈绍龙	18991870994	5	0	0	2	4	2	1	1	59	40	1	6	0	1		2	2	57	38	1	2	0	0
626	SY0123	陈杰	孙彬涵	湖北省荆门市沙洋县	五里铺镇陈池村	蔡庆菊	13799990791	3	0	0	2	2	2	1	1	43	22	0	9	0	2	3	2	2	46	23	0	12	0	2	3
627	SY0124	陈杰	孙彬涵	湖北省荆门市沙洋县	五里铺镇陈池村	陈立群	13477557658	5	2	0	4	2	2	1	2	40	20	0	9	0	0		2	1	42	22	0	12	0	4	5
628	SY0125	陈杰	孙彬涵	湖北省荆门市沙洋县	五里铺镇陈池村	刘双红		5	2	0	3	4	2	1	1	42	24	0	9	0	10	5	2	2	40	22	0	9	0	0
629	SY0126	陈杰	孙彬涵	湖北省荆门市沙洋县	五里铺镇陈池村	赵雄	18972881138	6	0	1	3	4	2	1	1	54	30	1	5	1	3	1	2	2	53	30	1	5	0	0	1
630	SY0427	陈杰	孙彬涵	湖北省荆门市沙洋县	后港镇韩场村	熊传林	13477381847	2	0	0	2	0	2	1	1	63	34	1	6	0	1	1	2	2	59	32	1	6	0	0	0
631	SY0428	陈杰	孙彬涵	湖北省荆门市沙洋县	后港镇韩场村	曹友平	13037255383	2	0	0	2	2	2	1	1	54	25	1	6	0	3	1	2	2	51	23	1	6	0	0	0
632	SY0429	陈杰	孙彬涵	湖北省荆门市沙洋县	后港镇韩场村	熊玉邦	15827858918	5	1	0	2	4	2	1	1	66	49	1	7	0	0		2	2	63	45	1	4	0	0
633	SY0430	陈杰	孙彬涵	湖北省荆门市沙洋县	后港镇韩场村	张清林	13277634026	4	0	0	2	3	1	1	1	53	30	1	5	0	0
634	SY0431	陈杰	孙彬涵	湖北省荆门市沙洋县	后港镇韩场村	熊志艳	13044881376	5	0	0	2	2	2	1	1	50	28	1	3	0	0		2	2	50	29	1	9	1	0
635	SY0432	陈杰	孙彬涵	湖北省荆门市沙洋县	后港镇韩场村	张胜利	13597968512	5	1	0	2	2	2	1	1	43	7	0	12	0	0		2	2	40	7	0	9	0	0
636	SY0316	陈杰	孙彬涵	湖北省荆门市沙洋县	后港镇李台村	张国泉	18727629507	4	2	0	2	4	2	1	1	78	55	0	10	0	0		2	2	74	53	0	1	0	0	0
637	SY0317	陈杰	孙彬涵	湖北省荆门市沙洋县	后港镇李台村	张国明	17187140266	2	2	0	2	2	2	1	1	70	55	1	6	1	0	0	2	2	69	53	1	0	0	0	0
638	SY0318	陈杰	孙彬涵	湖北省荆门市沙洋县	后港镇李台村	李兴龙	13797891707	5	0	0	3	3	2	1	1	43	3	0	6	0	0		2	2	41	3	0	6	0	0
639	SY0521	陈杰	孙彬涵	湖北省荆门市沙洋县	毛李镇毛李村	王玉华		4	1	0	4	3	1	1	1	67	40	1	0	0	0	0
640	SY0522	陈杰	孙彬涵	湖北省荆门市沙洋县	毛李镇毛李村	雷清安	17786542905	2	2	0	2	2	2	1	1	68	43	1	5	0	0	0	2	2	65	40	0	3	0	0	0
641	SY0523	陈杰	孙彬涵	湖北省荆门市沙洋县	毛李镇毛李村	许志发	13999922421	2	2	0	2	2	2	1	1	70	55	1	3	0	0	0	2	2	66	50	0	0	0	0	0
642	SY0524	陈杰	孙彬涵	湖北省荆门市沙洋县	毛李镇毛李村	宋代权	19171504104	2	0	0	1	1	1	1	1	55	35	1	9	0	1	1
643	SY0525	陈杰	孙彬涵	湖北省荆门市沙洋县	毛李镇毛李村	宋举中	13377995530	9	1	0	4	6	2	1	1	65	40	1	9	0	0	0	2	2	63	39	0	1	0	0	0
644	SY0512	陈雨岚	孙彬涵	湖北省荆门市沙洋县	毛李镇毛李村	彭道明	13310520656	3	0	0	2	3	2	1	1	52	20	1	6	0	0		2	2	51	20	0	6	0	0
645	SY0513	陈雨岚	孙彬涵	湖北省荆门市沙洋县	毛李镇毛李村	周开*	13177144289	2	0	0	2	2	1	1	1	57	30	0	9	0	6	1
646	SY0514	陈雨岚	孙彬涵	湖北省荆门市沙洋县	毛李镇毛李村	刘光华	13886921216	2	0	0	2	2	2	1	1	63	40	0	9	0	0		2	2	60	40	0	9	0	0
647	SY0515	陈雨岚	孙彬涵	湖北省荆门市沙洋县	毛李镇毛李村	陈凤山	18986964729	6	2	0	4	4	2	1	1	67	45	0	9	0	0		2	2	65	43	0	9	0	0
648	SY0516	陈雨岚	孙彬涵	湖北省荆门市沙洋县	毛李镇毛李村	戴周杨	18696000039	6	0	1	6	4	2	1	1	32	10	0	15	1	12	1	4	1	55	20	0	5	0	3	1
649	JS0104	陈雨岚	孙彬涵	湖北省荆门市京山市	雁门口镇瓦庙村	李松二	13237289723	4	0	1	2	2	2	1	1	53	33	0	9	0	1	1	2	2	50	30	1	9	0	0
650	JS0105	陈雨岚	孙彬涵	湖北省荆门市京山市	雁门口镇瓦庙村	付秋耳	15976678917	3	1	0	2	2	1	1	1	70	50	1	6	0	0
651	JS0106	陈雨岚	孙彬涵	湖北省荆门市京山市	雁门口镇瓦庙村	周艾红	13886949441	3	0	0	2	3	2	1	2	54	36	1	12	1	12	1	2	1	58	40	1	12	0	0
652	JS0107	陈雨岚	孙彬涵	湖北省荆门市京山市	雁门口镇瓦庙村	任光海	15586177329	7	1	1	5	1	1	1	1	63	43	1	12	0	0
653	JS0205	陈雨岚	孙彬涵	湖北省荆门市京山市	雁门口镇白虎村	叶金平	13044871766	5	0	0	3	2	2	1	1	58	40	0	9	0	0		2	2	57	40	0	0	0	0
654	JS0206	陈雨岚	孙彬涵	湖北省荆门市京山市	雁门口镇白虎村	李华平	15908692945	3	0	0	2	1	1	1	1	56	35	0	6	0	0
655	JS0207	陈雨岚	孙彬涵	湖北省荆门市京山市	雁门口镇白虎村	刘资兵	15908692938	3	0	0	2	2	2	1	1	59	40	0	9	0	0		2	2	52	33	1	9	0	0
656	JS0305	陈雨岚	孙彬涵	湖北省荆门市京山市	雁门口镇中南山村	蔡云彪	15971958426	6	2	1	2	2	2	1	1	68	40	1	9	0	0		2	2	67	40	1	6	0	0
657	JS0306	陈雨岚	孙彬涵	湖北省荆门市京山市	雁门口镇中南山村	陈千秀	13477352696	4	0	0	2	2	2	1	2	60	45	0	6	0	0		2	1	61	46	1	6	0	2	4
658	JS0307	陈雨岚	孙彬涵	湖北省荆门市京山市	雁门口镇中南山村	吴鹏	15827882728	6	0	0	3	5	1	1	1	32	5	0	15	1	12	1
659	JS0403	陈雨岚	孙彬涵	湖北省荆门市京山市	曹武镇顾家场村	刘平安	13972860984	2	0	0	2	2	2	1	1	56	40	0	9	0	0		2	2	50	30	0	9	0	0
660	JS0404	陈雨岚	孙彬涵	湖北省荆门市京山市	曹武镇顾家场村	陈晓斌	13972917226	2	0	0	2	2	2	1	1	52	40	1	6	0	0		2	2	52	40	1	6	0	0
661	JS0405	陈雨岚	孙彬涵	湖北省荆门市京山市	曹武镇顾家场村	王治军	13774002516	4	1	0	2	2	2	1	1	51	35	0	9	0	0		2	2	50	34	0	6	0	0
662	JS0601	陈雨岚	孙彬涵	湖北省荆门市京山市	曹武镇谷家岭村	王娇娥	15886941454	2	0	0	2	2	2	1	2	58	36	0	7	0	0		2	1	59	37	1	9	1	0
663	JS0602	陈雨岚	孙彬涵	湖北省荆门市京山市	曹武镇谷家岭村	张永成	15872976112	2	2	0	2	2	1	1	1	57	43	0	7	0	2	1
664	JS0603	陈雨岚	孙彬涵	湖北省荆门市京山市	曹武镇谷家岭村	燕修成	13477553034	4	1	2	4	1	1	1	1	56	42	0	9	0	1	1
665	JS0705	陈雨岚	孙彬涵	湖北省荆门市京山市	曹武镇民主村	乔华丽	13409607102	4	1	0	3	2	2	1	2	53	38	1	6	0	6	1	2	1	53	38	0	12	1	12	1
666	JS0706	陈雨岚	孙彬涵	湖北省荆门市京山市	曹武镇民主村	蔡俊	13886949091	4	0	0	3	2	2	1	1	56	25	0	6	0	3	1	2	2	56	25	0	6	0	0
667	JS0707	陈雨岚	孙彬涵	湖北省荆门市京山市	曹武镇民主村	王华龙	13677263233	1	1	0	1	1	1	1	1	67	50	0	9	0	0
668	JS0708	陈雨岚	孙彬涵	湖北省荆门市京山市	曹武镇民主村	骆*华	13597999072	2	0	1	2	2	2	1	1	60	47	1	7	1	12	1	2	2	58	45	0	6	0	0
669	JS0906	陈雨岚	孙彬涵	湖北省荆门市京山市	石龙镇五姊山村	曾令国	15327518030	3	2	0	2	1	1	1	1	71	40	1	9	0	0
670	JS0907	陈雨岚	孙彬涵	湖北省荆门市京山市	石龙镇五姊山村	吴元龙	13677272351	2	0	0	2	2	2	1	1	55	40	0	6	0	4	2	2	2	54	40	0	9	0	0
671	JS0908	陈雨岚	孙彬涵	湖北省荆门市京山市	石龙镇五姊山村	郑云梅	16624177226	6	2	0	4	2	2	1	2	48	20	0	9	0	0		2	1	47	21	0	9	0	12	1
672	JS0909	陈雨岚	孙彬涵	湖北省荆门市京山市	石龙镇五姊山村	黄莲香	18371140809	3	0	0	2	2	2	1	2	52	22	0	6	0	2	1	2	1	54	24	0	9	0	6	1
673	JS0910	陈雨岚	孙彬涵	湖北省荆门市京山市	石龙镇五姊山村	毕海元	13774007362	1	0	0	1	1	1	1	2	52	22	1	6	0	0
674	SY0117	陈雨岚	孙彬涵	湖北省荆门市沙洋县	五里铺镇陈池村	王玫芳	13797943780	3	0	0	1	3	1	1	2	52	34	1	9	1	3	1
675	SY0414	王建鑫	孙彬涵	湖北省荆门市沙洋县	后港镇韩场村	谭绪廷	15071971199	6	2	1	6	4	3	1	1	38	10	0	11	1	12	1	4	1	69	51	1	5	0	0		4	2	66	48	0	5	0	0
676	XT005	唐林	唐林	湖北省仙桃市	彭场镇七里村	张培思		4	0	0	3	3	2	1	1	55	30	0	12	1	0	0
677	XT005	唐林	唐林	湖北省仙桃市	彭场镇七里村	易汉江		6	2	2	2	2	2	1	1	67	50	0	6	0	0	0
678	XT005	唐林	唐林	湖北省仙桃市	彭场镇七里村	周德丑		5	2	0	2	3	2	1	1	66	41	0	6	0	0	0
679	XT005	唐林	唐林	湖北省仙桃市	彭场镇七里村	周德朋		3	0	0	2	3	2	1	1	58	40	0	9	0	0	0
680	XT005	唐林	唐林	湖北省仙桃市	彭场镇七里村	王德娇	13545983622	2	0	0	2	2	2	1	2	53	30	0	9	1	0	0
681	XT005	唐林	唐林	湖北省仙桃市	彭场镇七里村	周春才		5	0	0	5	3	1	1	1	56	40	0	9	0	0	0
682	XT006	唐林	唐林	湖北省仙桃市	毛嘴镇秦杨村	邓德标		2	2	0	2	0	2	1	1	70	50	0	6	0	0	0
683	XT006	唐林	唐林	湖北省仙桃市	毛嘴镇秦杨村	秦新寿		2	2	0	2	0	2	1	1	73	56	1	6	0	0	0
684	XT006	唐林	唐林	湖北省仙桃市	毛嘴镇秦杨村	蒋社军		4	0	0	3	3	1	1	1	49	30	0	9	0	0	0
685	XT006	唐林	唐林	湖北省仙桃市	毛嘴镇秦杨村	秦大举		5	2	0	2	2	2	1	1	78	60	0	9	0	0	0
686	XT006	唐林	唐林	湖北省仙桃市	毛嘴镇秦杨村	丁亨彪		5	1	0	2	3	2	1	1	64	45	1	6	0	0	0
687	XT006	唐林	唐林	湖北省仙桃市	毛嘴镇秦杨村	秦艳清		3	0	0	1	3	1	1	1	51	30	0	9	0	0	0
688		唐林	唐林	湖北省仙桃市	彭场镇汪赵村	田雨盛		7	2	2	2	4	2	1	2	66	40	1	0	0	0	0
689		唐林	唐林	湖北省仙桃市	彭场镇金剅村	邓普清		4	2	0	4	2	2	1	2	65	40	0	6	0	0	0
690		唐林	唐林	湖北省仙桃市	彭场镇许湾村	田雨利		3	1	0	3	2	2	1	1	53	30	0	0	0	0	0
691	QJ007	唐林	唐林	湖北省潜江市	老新镇三桥村	刘香三		3	1	0	3	2	2	1	2	60	40	0	0	0	0	0
692	QJ007	唐林	唐林	湖北省潜江市	老新镇三桥村	孙玉兰		4	0	1	2	3	2	1	2	59	40	0	0	0	0	0
693	QJ007	唐林	唐林	湖北省潜江市	老新镇三桥村	张仁友		8	2	1	4	5	1	1	1	56	30	0	9	0	0	0
694	QJ007	唐林	唐林	湖北省潜江市	老新镇三桥村	杨荣早		3	0	0	2	3	2	1	1	57	40	0	9	0	0	0
695	QJ007	唐林	唐林	湖北省潜江市	老新镇三桥村	张仁虎		5	1	0	2	3	2	1	1	50	30	0	9	0	0	0
696	QJ008	唐林	唐林	湖北省潜江市	老新镇赤生村	刘经龙		3	0	0	3	3	2	1	1	56	40	0	9	0	0	0
697	QJ008	唐林	唐林	湖北省潜江市	老新镇赤生村	刘声贵		6	2	1	5	3	2	1	1	41	20	0	9	1	0	0
698	QJ008	唐林	唐林	湖北省潜江市	老新镇赤生村	徐光耀		3	2	0	2	1	2	1	1	70	55	0	6	0	0	0
699	QJ008	唐林	唐林	湖北省潜江市	老新镇赤生村	付必生		5	0	1	3	4	2	1	1	55	35	0	9	0	0	0
700	QJ010	唐林	唐林	湖北省潜江市	龙湾镇郑家湖村	郑继法		6	1	1	3	3	2	1	1	52	30	0	12	0	0	0
701	QJ010	唐林	唐林	湖北省潜江市	龙湾镇郑家湖村	马在文		4	1	0	2	2	2	1	1	50	30	1	9	0	0	0
702	QJ010	唐林	唐林	湖北省潜江市	龙湾镇郑家湖村	葛玉安		3	0	0	2	3	2	1	2	54	30	0	6	0	0	0
703	QJ010	唐林	唐林	湖北省潜江市	龙湾镇郑家湖村	徐艮安		3	0	0	2	3	2	1	2	49	30	0	9	1	0	0
704	JS0508	陈杰	王建鑫	湖北省荆门市京山市	曹武镇九房村	罗祖元	13677276418	2	1	0	2	2	2	1	1	66	47	0	6	0	0	0	2	2	64	47	1	3	0	0	0
705	JS0509	陈杰	王建鑫	湖北省荆门市京山市	曹武镇九房村	张民主	18772738750	4	2	1	4	4	2	1	1	68	50	0	4	0	0	0	2	2	68	50	0	9	0	0	0
706	SY0106	王建鑫	王建鑫	湖北省荆门市沙洋县	五里铺镇陈池村	陈金春	13971865882	7	0	1	2	4	1	1	2	56	41	1	8	0	0	0
707	SY0107	王建鑫	王建鑫	湖北省荆门市沙洋县	五里铺镇陈池村	陈祖权	13597946438	2	0	0	2	2	2	1	1	56	33	0	8	0	0	0	2	2	55	32	1	8	0	0	0
708	SY0108	王建鑫	王建鑫	湖北省荆门市沙洋县	五里铺镇陈池村	陈祖兵	13677269680	2	1	0	2	1	1	1	1	57	44	1	8	1	12	1
709	SY0109	王建鑫	王建鑫	湖北省荆门市沙洋县	五里铺镇陈池村	丁祥会	15872954627	3	1	0	1	3	1	1	1	65	48	1	0	0	0	0
710	SY0110	王建鑫	王建鑫	湖北省荆门市沙洋县	五里铺镇陈池村	陈贵春	15871994978	4	0	0	2	4	2	1	2	59	39	0	11	0	0	0	2	1	59	39	1	11	0	0	0
711	SY0206	王建鑫	王建鑫	湖北省荆门市沙洋县	五里铺镇赵集村	赵先华	13677263550	2	0	0	2	2	2	1	1	54	36	0	8	0	0	0	2	2	53	35	0	5	0	0	0
712	SY0207	王建鑫	王建鑫	湖北省荆门市沙洋县	五里铺镇赵集村	刘祖禹	15872920121	2	2	0	2	2	2	1	1	68	43	1	11	0	0	0	2	2	68	43	1	5	0	0	0
713	SY0208	王建鑫	王建鑫	湖北省荆门市沙洋县	五里铺镇赵集村	高奎梅	13707264875	3	0	0	2	3	1	1	2	50	30	0	8	0	0	0	2	1	53	33	0	8	0	4	2
714	SY0209	王建鑫	王建鑫	湖北省荆门市沙洋县	五里铺镇赵集村	吕正刚	15271781267	5	0	1	2	4	2	1	1	62	50	0	2	0	0	0	2	2	60	48	1	5	0	0	0
715	SY0210	王建鑫	王建鑫	湖北省荆门市沙洋县	五里铺镇赵集村	张德国	13972915090	2	2	0	2	2	2	1	1	69	50	1	12	0	0	0	2	2	68	50	1	3	0	0	0
716	SY0408	王建鑫	王建鑫	湖北省荆门市沙洋县	后港镇韩场村	张清玉	13257248198	4	0	0	3	3	2	1	1	64	50	1	8	1	6	1	2	2	60	42	1	5	0	0	0
717	SY0409	王建鑫	王建鑫	湖北省荆门市沙洋县	后港镇韩场村	熊志华	15572670150	4	0	0	4	2	2	1	1	60	40	0	8	1	12	1	2	2	57	40	0	5	0	0	0
718	SY0410	王建鑫	王建鑫	湖北省荆门市沙洋县	后港镇韩场村	冯祖英	13972919151	5	1	0	3	4	2	1	1	70	58	0	7	0	0	0	2	2	64	50	1	0	0	0	0
719	SY0411	王建鑫	王建鑫	湖北省荆门市沙洋县	后港镇韩场村	刘祖新	13972886704	2	0	0	2	2	2	1	1	56	38	1	8	1	12	1	2	2	55	40	0	5	0	0	0
720	SY0412	王建鑫	王建鑫	湖北省荆门市沙洋县	后港镇韩场村	钟延金	17307243265	2	2	0	0	0	0	1	1	68	55	0	5	0	0	0	2	2	67	49	0	3	0	0	0
721	SY0413	王建鑫	王建鑫	湖北省荆门市京山市	后港镇韩场村	熊传忠		6	0	1	2	4	2	1	1	59	42	0	8	0	0	0	2	2	56	39	0	5	0	0	0
722	JS0114	王建鑫	王建鑫	湖北省荆门市京山市	雁门口镇瓦庙村	何中心	13797901483	5	1	0	4	4	2	1	1	66	50	1	3	0	0	0	2	2	64	48	1	2	0	0	0
723	JS0115	王建鑫	王建鑫	湖北省荆门市京山市	雁门口镇瓦庙村	徐华忠	15872907925	5	2	0	2	4	2	1	1	74	60	1	3	0	0	0	2	2	70	56	1	0	0	0	0
724	JS0216	王建鑫	王建鑫	湖北省荆门市京山市	雁门口镇白虎村	成云良	13477573755	9	1	1	5	6	2	1	1	65	49	0	5	0	0	0	2	2	64	48	0	5	0	0	0
725	JS0217	王建鑫	王建鑫	湖北省荆门市京山市	雁门口镇白虎村	周佳银	15908663095	5	0	1	3	4	2	1	1	57	33	1	8	0	2	1	2	2	53	29	1	5	0	0	0
726	JS0218	王建鑫	王建鑫	湖北省荆门市京山市	雁门口镇白虎村	成海红	15872973013	8	0	2	4	6	2	1	1	55	39	0	6	0	2	1	2	2	53	37	0	5	0	0	0
727	JS0219	王建鑫	王建鑫	湖北省荆门市京山市	雁门口镇白虎村	王如请	13677248643	5	0	0	2	4	2	1	1	58	33	0	8	0	0	0	2	2	58	33	0	8	0	0	0
728	JS0220	王建鑫	王建鑫	湖北省荆门市京山市	雁门口镇白虎村	张稳平	13597980111	6	0	2	4	4	2	1	1	53	35	0	8	0	2	1	2	2	53	35	1	8	0	0	0
729	JS0313	王建鑫	王建鑫	湖北省荆门市京山市	雁门口镇中南山村	赵伟	18163065110	6	0	0	5	4	3	1	1	36	13	0	9	0	12	1	2	1	58	40	0	11	0	0	0	3	2	58	40	0	11	0	0	0
730	JS0314	王建鑫	王建鑫	湖北省荆门市京山市	雁门口镇中南山村	付义	13451162820	4	0	0	3	3	2	1	1	47	24	0	8	0	4	2	2	2	46	23	0	8	0	0	0
731	JS0315	王建鑫	王建鑫	湖北省荆门市京山市	雁门口镇中南山村	叶达林	15971969556	4	0	0	1	3	1	1	1	58	35	0	11	0	3	1
732	JS0513	王建鑫	王建鑫	湖北省荆门市京山市	曹武镇九房村	胡远华	13886945179	2	1	0	2	2	2	1	1	66	44	0	8	0	0	0	2	2	58	36	0	5	0	0	0
733	JS0514	王建鑫	王建鑫	湖北省荆门市京山市	曹武镇九房村	罗青松	13093208427	5	0	0	5	4	2	1	1	59	42	0	8	0	0	0	2	2	59	39	0	8	0	0	0
734	JS0515	王建鑫	王建鑫	湖北省荆门市京山市	曹武镇九房村	张贵成	13317515673	2	2	0	2	2	2	1	1	65	49	1	8	0	0	0	2	2	66	50	1	0	0	0	0
735	JS0606	王建鑫	王建鑫	湖北省荆门市京山市	曹武镇谷家岭村	唐成平	13581340803	6	1	1	4	4	2	1	1	52	32	0	8	1	12	1	2	2	50	30	0	8	0	0	0
736	JS0607	王建鑫	王建鑫	湖北省荆门市京山市	曹武镇谷家岭村	谷凡贵	15807268337	3	2	0	2	2	2	1	1	70	53	1	5	0	0	0	2	2	68	51	0	5	0	0	0
737	JS0608	王建鑫	王建鑫	湖北省荆门市京山市	曹武镇谷家岭村	潘友斌	13774052406	2	0	0	2	2	2	1	1	54	30	0	11	1	12	1	2	2	54	30	0	11	1	12	1
738	JS0716	王建鑫	王建鑫	湖北省荆门市京山市	曹武镇民主村	曾维明	15763081037	3	1	0	3	2	2	1	1	56	36	0	5	0	2	1	2	2	56	36	0	5	0	0	0
739	JS0717	王建鑫	王建鑫	湖北省荆门市京山市	曹武镇民主村	刘义斌	15871998011	4	0	0	3	3	2	1	1	49	10	0	5	0	12	1	2	2	47	10	0	11	0	12	1
740	JS0718	王建鑫	王建鑫	湖北省荆门市京山市	曹武镇民主村	范才东	15871981435	3	0	0	2	3	2	1	1	53	35	0	8	0	0	0	2	2	46	35	0	8	0	0	0
741	JS0719	王建鑫	王建鑫	湖北省荆门市京山市	曹武镇民主村	唐辉彪	13515987763	6	2	1	3	5	1	1	1	40	1	0	6	0	0	0
742	JS0911	王建鑫	王建鑫	湖北省荆门市京山市	石龙镇五姊山村	曾令付	13997908365	7	0	0	5	4	2	1	1	62	47	0	11	0	0	0	2	2	61	46	0	8	0	0	0
743	JS0912	王建鑫	王建鑫	湖北省荆门市京山市	石龙镇五姊山村	季占中		4	2	0	2	4	1	1	1	72	57	0	5	0	0	0	2	2	68	53	0	5	0	0	0
744	JS0913	王建鑫	王建鑫	湖北省荆门市京山市	石龙镇五姊山村	陈功云	13886903287	5	2	0	2	4	2	1	1	70	51	1	8	0	0	0	2	2	65	43	1	0	0	0	0
745	JS0914	王建鑫	王建鑫	湖北省荆门市京山市	石龙镇五姊山村	李道荣	15872909096	3	2	0	2	2	2	1	1	70	50	1	11	0	0	0	2	2	66	40	1	11	0	0	0
746	JS0915	王建鑫	王建鑫	湖北省荆门市京山市	石龙镇五姊山村	曾德文	13972912448	3	0	0	2	2	2	1	1	52	38	0	8	0	5	1	2	2	50	38	0	8	0	0	0
747	ZY0218	闫阿倩	闫阿倩	湖北省襄阳市枣阳市	兴隆镇冯岗村	杨远尧	13871643219	2	2	0	2	2	2	1	1	65	45	1	12	1	0	0	2	2	68	45	0	12	1	0	0
748	ZY0401	闫阿倩	闫阿倩	湖北省襄阳市枣阳市	兴隆镇大堰村	吴明友	13667239131	5	1	0	3	2	2	1	1	32	30	0	9	0	2	1	2	2	51	30	0	12	0	0	0
749	ZY0402	闫阿倩	闫阿倩	湖北省襄阳市枣阳市	兴隆镇大堰村	刘天有	15334222628	2	0	0	2	2	2	1	1	63	45	0	9	0	0	0	2	2	65	45	0	12	0	0	0
750	ZY0701	闫阿倩	闫阿倩	湖北省襄阳市枣阳市	南城街道彭岗村	李因权	13687298052	5	0	1	1	3	2	1	1	57	37	0	9	1	0	0	2	2	56	30	0	9	0	0	0
751	ZY0802	闫阿倩	闫阿倩	湖北省襄阳市枣阳市	南城街道耿畈村	耿安义	13452631716	8	2	0	1	4	1	1	1	72	50	1	6	0	0	0
752	ZY0801	闫阿倩	闫阿倩	湖北省襄阳市枣阳市	南城街道耿畈村	耿纯如	13462173156	6	0	1	4	4	2	1	1	60	40	0	6	0	2	1	2	2	59	35	0	6	0	0	0
753	ZY0620	闫阿倩	闫阿倩	湖北省襄阳市枣阳市	南城街道李家庄村	王发成	13727653191	4	2	0	4	3	2	1	1	75	50	1	9	1	0	0	2	2	72	50	1	9	0	0	0
754	ZY0619	闫阿倩	闫阿倩	湖北省襄阳市枣阳市	南城街道李家庄村	王海士	13797696316	4	0	0	1	2	1	1	1	44	23	0	15	1	0	0
755	ZY0618	闫阿倩	闫阿倩	湖北省襄阳市枣阳市	南城街道李家庄村	龚彦军	15571116933	6	2	0	5	2	2	1	1	43	20	0	9	0	2	1	2	2	43	20	1	9	0	0	0
756	ZY0617	闫阿倩	闫阿倩	湖北省襄阳市枣阳市	南城街道李家庄村	龚白权	1379268139	4	1	0	3	3	1	1	1	59	39	0	9	0	0	0
757	ZY0616	闫阿倩	闫阿倩	湖北省襄阳市枣阳市	南城街道耿畈村	毛义友	13662171389	2	2	0	2	2	1	1	1	74	50	1	9	0	0	0
758	ZY0501	闫阿倩	闫阿倩	湖北省襄阳市枣阳市	南城街道后湖村	叶问	13667281341	6	2	1	4	4	2	1	1	68	48	1	9	0	0	0	2	2	68	48	1	9	0	0	0
759	ZY0502	闫阿倩	闫阿倩	湖北省襄阳市枣阳市	南城街道后湖村	李元兴	13772561788	4	0	0	2	4	2	1	2	59	43	1	9	0	2	1	2	1	58	43	1	9	0	0	0
760	ZY0503	闫阿倩	闫阿倩	湖北省襄阳市枣阳市	南城街道后湖村	李德忠	18736123170	2	2	0	2	1	1	1	1	74	50	0	9	0	0	0
761	XZ0801	闫阿倩	闫阿倩	湖北省襄阳市襄州区	双沟镇程冢村	何庆国	13424673680	6	1	0	3	2	2	1	2	57	37	1	0	0	0	0	2	1	58	38	0	6	0	3	2
762	XZ0802	闫阿倩	闫阿倩	湖北省襄阳市襄州区	双沟镇程冢村	韩建丽	13627863233	5	2	0	2	4	2	1	1	70	50	0	0	0	0		2	2	70	50	0	0	0	0	0
763	XZ0701	闫阿倩	闫阿倩	湖北省襄阳市襄州区	双沟镇韦庄村	韦建国	13672633785	3	0	0	2	2	2	1	2	53	35	1	6	0	0	0	2	1	53	30	0	9	0	2	1
764	XZ0702	闫阿倩	闫阿倩	湖北省襄阳市襄州区	双沟镇韦庄村	黄天韦	13426781672	2	2	0	2	2	2	1	1	73	50	1	6	1	0	0	2	2	74	50	1	6	0	0	0
765	XZ0603	闫阿倩	闫阿倩	湖北省襄阳市襄州区	峪山镇樊岗村	庄贵生	13627261738	7	3	0	4	2	1	1	2	41	10	1	6	0	0	0
766	XZ0602	闫阿倩	闫阿倩	湖北省襄阳市襄州区	峪山镇樊岗村	张军国	13667265329	8	1	1	8	3	1	1	1	59	40	1	0	0	0	0
767	XZ0601	闫阿倩	闫阿倩	湖北省襄阳市襄州区	峪山镇樊岗村	梅香	15637253631	6	0	0	5	4	2	1	2	48	30	1	0	0	0	0	2	1	53	30	0	0	0	5	5
768	XZ0501	闫阿倩	闫阿倩	湖北省襄阳市襄州区	峪山镇毕岗村	毕保启	13876270354	3	2	0	3	2	2	1	1	69	45	1	9	1	0	0	2	2	65	40	1	6	0	0	0
769	XZ0502	闫阿倩	闫阿倩	湖北省襄阳市襄州区	峪山镇毕岗村	毕军友	13227885352	4	2	0	4	3	2	1	2	71	50	1	0	0	0	0	2	1	75	50	1	9	0	0	0
770	XZ0503	闫阿倩	闫阿倩	湖北省襄阳市襄州区	峪山镇樊岗村	贺怀焜	13421370635	5	2	0	2	4	2	1	1	66	46	1	0	0	0	0	2	2	67	46	0	0	0	0	0
771	XZ0403	闫阿倩	闫阿倩	湖北省襄阳市襄州区	峪山镇黄湾村	杨林友	13456762786	6	2	1	2	4	2	1	2	70	50	1	2	0	0	0	2	1	68	50	0	2	0	0	0
772	XZ0402	闫阿倩	闫阿倩	湖北省襄阳市襄州区	峪山镇黄湾村	李家强	133484732653	8	2	1	5	3	1	1	2	68	50	1	0	0	0	0
773	XZ0401	闫阿倩	闫阿倩	湖北省襄阳市襄州区	峪山镇黄湾村	李华伟	13667296326	6	1	0	2	4	2	1	1	66	45	0	6	1	0	0	2	2	52	32	1	2	0	0	0
774	XZ0202	闫阿倩	闫阿倩	湖北省襄阳市襄州区	张家集镇李营村	李宝国	15667236318	5	0	0	2	4	2	1	1	58	30	0	9	0	2	3	2	2	58	30	0	9	0	2	3
775	XZ0201	闫阿倩	闫阿倩	湖北省襄阳市襄州区	张家集镇李营村	李雄飞	152710078259	7	1	1	3	4	2	1	1	53	11	1	9	1	12	1	2	2	51	11	1	6	0	0	0
776	XZ0101	闫阿倩	闫阿倩	湖北省襄阳市襄州区	张家集镇聂岗村	张国俊	13871763839	5	1	1	5	5	2	1	1	46	25	0	9	1	12	1	2	2	46	25	0	9	0	0	0
777	TF0131	赵雯歆	赵雯歆	湖北省黄冈市团风县	总路咀镇卢家榜村	余子光	13907255534	3	1	0	3	1	1	2	1	58	40	0	9	0	0	0
778	TF0132	赵雯歆	赵雯歆	湖北省黄冈市团风县	总路咀镇卢家榜村	王少松	13409862842	5	1	1	3	3	1	1	1	65	50	0	9	0	0	0
779	TF0133	赵雯歆	赵雯歆	湖北省黄冈市团风县	总路咀镇卢家榜村	汪海春		4	1	1	1	1	3	1	1	78	50	0	6	1	0	0
780	TF0134	赵雯歆	赵雯歆	湖北省黄冈市团风县	总路咀镇卢家榜村	郑怀有	13114435015	2	2	0	2	2	2	1	1	63	30	1	12	0	0	0	2	2	62	40	1	12	0	0	0
781	TF0231	赵雯歆	赵雯歆	湖北省黄冈市团风县	总路咀镇双河口村	余佑安	15771199009	4	1	0	2	2	2	1	1	67	50	1	12	0	0	0	2	2	63	50	0	9	0	0	0
782	TF0232	赵雯歆	赵雯歆	湖北省黄冈市团风县	总路咀镇双河口村	夏小波	15071430968	5	0	1	5	1	1	1	1	35	4	0	12	0	0	0
783	TF0233	赵雯歆	赵雯歆	湖北省黄冈市团风县	总路咀镇双河口村	倪辉	15671715688	5	0	0	3	1	1	4	1	57	30	0	6	0	0	0
784	TF0234	赵雯歆	赵雯歆	湖北省黄冈市团风县	总路咀镇双河口村	陈艳生	15098008793	5	0	0	2	2	1	1	2	55	30	0	9	0	0	0
785	TF0235	赵雯歆	赵雯歆	湖北省黄冈市团风县	总路咀镇双河口村	李桂英	17786196877	4	0	0	2	4	2	1	2	56	40	0	6	0	12	1	2	1	60	50	1	6	0	0	0
786	TF0236	赵雯歆	赵雯歆	湖北省黄冈市团风县	总路咀镇双河口村	胡爱华	18986740727	6	0	1	6	5	1	1	2	56	30	0	0	0	0	0
787	TF0237	赵雯歆	赵雯歆	湖北省黄冈市团风县	总路咀镇双河口村	童银枝		5	0	0	2	4	2	1	2	62	40	0	9	0	0	0
788	TF0331	赵雯歆	赵雯歆	湖北省黄冈市团风县	马曹庙镇大路岗村	樊共乔		2	2	0	2	1	1	1	1	67	50	0	6	0	0	0
789	TF0332	赵雯歆	赵雯歆	湖北省黄冈市团风县	马曹庙镇大路岗村	徐佑生	15327700341	6	2	0	4	4	2	1	1	76	30	1	6	0	0	0	2	2	65	30	1	6	0	0	0
790	TF0333	赵雯歆	赵雯歆	湖北省黄冈市团风县	马曹庙镇大路岗村	谭少明	1557391239	6	2	1	4	2	1	1	1	72	60	1	6	0	0	0
791	TF0431	赵雯歆	赵雯歆	湖北省黄冈市团风县	马曹庙镇桥子畈村	陈三桃	18062865771	8	1	0	4	3	1	1	2	60	40	1	12	0	0	0
792	TF0432	赵雯歆	赵雯歆	湖北省黄冈市团风县	马曹庙镇桥子畈村	曹国良		6	0	0	6	4	1	1	1	63	50	0	0	0	0	0
793	TF0433	赵雯歆	赵雯歆	湖北省黄冈市团风县	马曹庙镇桥子畈村	曹伯清	13476775298	8	1	1	4	5	1	1	1	70	30	1	6	0	0	0
794	TF0531	赵雯歆	赵雯歆	湖北省黄冈市团风县	马曹庙镇沙河图村	陈国华	6171261	6	0	1	4	4	1	1	2	56	30	0	6	0	0	0
795	TF0532	赵雯歆	赵雯歆	湖北省黄冈市团风县	马曹庙镇沙河图村	樊松柏	13672559504	5	2	0	2	3	2	1	1	76	40	1	6	0	0	0	2	2	72	40	1	0	0	0	0
796	TF0533	赵雯歆	赵雯歆	湖北省黄冈市团风县	马曹庙镇沙河图村	樊佑涛	18062218875	3	2	0	2	2	1	1	1	69	50	1	9	0	0	0
797	TF0534	赵雯歆	赵雯歆	湖北省黄冈市团风县	马曹庙镇沙河图村	肖友元	13409868452	7	1	1	5	4	2	1	1	60	30	0	6	0	0	0
798	TF0631	赵雯歆	赵雯歆	湖北省黄冈市团风县	淋山河镇孙家山村	孙才生	13297564300	2	2	0	2	1	1	1	1	65	60	1	6	0	0	0
799	TF0632	赵雯歆	赵雯歆	湖北省黄冈市团风县	淋山河镇孙家山村	刘动生	15571385751	4	0	0	2	1	1	1	1	64	8	1	9	0	0	0
800	TF0633	赵雯歆	赵雯歆	湖北省黄冈市团风县	淋山河镇孙家山村	程志勇	18871339088	6	2	0	6	1	1	1	1	50	13	1	12	0	0	0
801	XS0131	赵雯歆	赵雯歆	湖北省黄冈市浠水县	兰溪镇盐客树村	徐建国	13476710143	4	0	0	4	1	1	1	1	51	50	1	16	0	0	0
802	XS0132	赵雯歆	赵雯歆	湖北省黄冈市浠水县	兰溪镇盐客树村	叶春客	15671738331	3	0	0	3	2	1	1	2	53	31	0	6	0	0	0
803	XS0133	赵雯歆	赵雯歆	湖北省黄冈市浠水县	兰溪镇盐客树村	李如旺	18827192812	7	2	0	4	3	1	1	1	70	52	1	6	0	0	0
804	XS0134	赵雯歆	赵雯歆	湖北省黄冈市浠水县	兰溪镇盐客树村	徐光全	15098038300	5	1	0	3	1	1	1	1	65	50	0	12	0	0	0
805	XS0231	赵雯歆	赵雯歆	湖北省黄冈市浠水县	兰溪镇三泉村	孙传道	16520195719	2	2	0	2	1	1	1	1	83	70	0	0	0	0	0
806	XS0232	赵雯歆	赵雯歆	湖北省黄冈市浠水县	兰溪镇三泉村	张意花	18771664079	6	0	0	2	3	1	1	2	72	60	0	6	0	0	0
807	XS0233	赵雯歆	赵雯歆	湖北省黄冈市浠水县	兰溪镇三泉村	朱和平	0713-4655017	6	2	1	3	4	1	1	1	74	60	1	6	0	0	0
808	XS0234	赵雯歆	赵雯歆	湖北省黄冈市浠水县	兰溪镇三泉村	赵玉平	18062850558	2	0	0	2	1	1	1	1	57	30	1	6	0	0	0
809	XS0331	赵雯歆	赵雯歆	湖北省黄冈市浠水县	清泉镇三台山村	司贵清	17364227116	7	1	1	5	4	1	1	2	58	50	1	9	0	0	0
810	XS0531	赵雯歆	赵雯歆	湖北省黄冈市浠水县	关口镇长流村	刘菊思	13872016527	6	1	0	4	3	1	1	2	64	40	1	3	0	0	0
811	XS0532	赵雯歆	赵雯歆	湖北省黄冈市浠水县	关口镇长流村	黄正杏	15771192826	5	1	1	2	3	2	1	2	57	40	0	2	0	0	0	2	1	66	40	1	6	0	0	0
812	XS0533	赵雯歆	赵雯歆	湖北省黄冈市浠水县	关口镇长流村	李小平	13886415549	6	0	0	2	4	2	1	1	54	40	0	6	0	0	0	2	1	58	40	0	9	0	0	0
813	XS0534	赵雯歆	赵雯歆	湖北省黄冈市浠水县	关口镇长流村	郭炳森	13409921177	5	2	0	2	3	1	1	1	70	50	0	12	0	0	0
814	XS0535	赵雯歆	赵雯歆	湖北省黄冈市浠水县	关口镇长流村	柴灯保	13636123797	6	2	0	2	2	1	1	1	70	20	0	2	0	0	0
815	XS0536	赵雯歆	赵雯歆	湖北省黄冈市浠水县	关口镇长流村	郭思明	13477620498	6	1	0	4	3	1	1	1	72	30	0	6	0	0	0
816	XS0537	赵雯歆	赵雯歆	湖北省黄冈市浠水县	关口镇长流村	郭炳辉	13886145546	8	1	0	1	8	1	1	1	74	60	0	2	0	0	0
817	XS0538	赵雯歆	赵雯歆	湖北省黄冈市浠水县	关口镇长流村	汪金超	13986557041	2	0	0	2	2	2	1	1	60	3	0	9	0	0	0	2	2	60	3	0	6	0	0	0
818	XS0539	赵雯歆	赵雯歆	湖北省黄冈市浠水县	关口镇长流村	郭小庆	13520822837	5	0	3	1	1	1	1	1	36	1	1	9	0	12	3
819	XS0631	赵雯歆	赵雯歆	湖北省黄冈市浠水县	洗马镇河东村	叶志华	18771662785	5	1	0	3	4	2	1	1	66	60	0	6	0	0	0	2	2	60	50	0	9	0	0	0
820	XS0632	赵雯歆	赵雯歆	湖北省黄冈市浠水县	洗马镇河东村	李正旺	18871348165	4	0	0	2	4	2	1	1	62	52	0	3	0	0	0	2	2	57	41	0	0	0	0	0
821	XS0633	赵雯歆	赵雯歆	湖北省黄冈市浠水县	洗马镇河东村	李之全	13409707235	6	2	2	6	3	1	1	1	70	50	1	6	0	0	0
822	XS0634	赵雯歆	赵雯歆	湖北省黄冈市浠水县	洗马镇河东村	李世中	13886403339	2	0	0	2	1	1	1	1	70	40	1	9	0	0	0
823	XS0635	赵雯歆	赵雯歆	湖北省黄冈市浠水县	洗马镇河东村	李正亮	4881201	7	2	0	2	5	2	1	1	69	50	1	6	0	0	0	2	2	65	50	0	6	0	0	0
824	JS0110	陈杰	赵雯歆	湖北省荆门市京山市	雁门口镇瓦庙村	郑福生	18163067573	2	0	0	2	2	2	1	1	52	35	1	3	0	0	0	2	2	51	32	0	5	0	0	0
825	JS0111	陈杰	赵雯歆	湖北省荆门市京山市	雁门口镇瓦庙村	黄金亭	15872173901	4	0	0	2	2	1	1	1	50	36	1	8	1	0	0
826	JS0112	陈杰	赵雯歆	湖北省荆门市京山市	雁门口镇瓦庙村	吴兆苟	13044880860	5	2	0	2	2	2	1	1	70	55	1	9	0	3	1	2	2	70	55	1	0	0	0	0
827	JS0113	陈杰	赵雯歆	湖北省荆门市京山市	雁门口镇瓦庙村	何仿二	19171505058	2	0	0	2	2	2	1	2	59	30	0	5	0	0	0	2	1	59	30	0	8	0	0	0
828	JS0213	陈杰	赵雯歆	湖北省荆门市京山市	雁门口镇白虎村	许光雄	15972602372	5	0	1	5	4	2	1	1	55	35	0	9	0	3	5	2	2	53	35	0	9	0	0	0
829	JS0214	陈杰	赵雯歆	湖北省荆门市京山市	雁门口镇白虎村	詹义兵	13872948065	6	2	0	6	2	2	1	1	47	25	0	9	0	0	0	2	2	42	25	0	9	0	0	0
830	JS0215	陈杰	赵雯歆	湖北省荆门市京山市	雁门口镇白虎村	郑肖	15329537516	4	0	1	4	2	1	1	2	30	3	0	12	1	0	0
831	JS0311	陈杰	赵雯歆	湖北省荆门市京山市	雁门口镇中南山村	张琼	13972917881	6	0	0	1	1	1	1	2	34	2	0	9	1	0	0
832	JS0312	陈杰	赵雯歆	湖北省荆门市京山市	雁门口镇中南山村	叶翠生	18971851325	4	0	4	1	1	1	1	1	54	22	0	6	1	0	0
833	JS0510	陈杰	赵雯歆	湖北省荆门市京山市	曹武镇九房村	张菊贵	15071901278	5	2	1	4	2	1	1	2	50	25	0	6	0	0	0
834	JS0511	陈杰	赵雯歆	湖北省荆门市京山市	曹武镇九房村	李泽平	15572615867	4	0	0	2	2	2	1	1	53	30	0	6	0	2	1	2	2	53	30	1	0	0	0	0
835	JS0512	陈杰	赵雯歆	湖北省荆门市京山市	曹武镇九房村	罗明峰	13607262434	2	0	0	2	2	2	1	1	52	30	0	6	0	0	0	2	2	50	30	0	6	0	0	0
836	JS0713	陈杰	赵雯歆	湖北省荆门市京山市	曹武镇民主村	毛三平	15992637993	3	0	0	2	3	2	1	1	54	30	1	9	0	2	4	2	2	53	30	1	6	0	0	0
837	JS0714	陈杰	赵雯歆	湖北省荆门市京山市	曹武镇民主村	张红耀	12597942969	5	0	0	3	4	2	1	1	52	30	1	9	0	0	0	2	2	51	30	0	12	1	0	0
838	JS0715	陈杰	赵雯歆	湖北省荆门市京山市	曹武镇民主村	宋秀军	13997939473	2	1	0	2	2	2	1	1	65	44	1	7	0	1	1	2	2	59	35	1	7	0	0	0
839	SY0415	何羽佳	赵雯歆	湖北省荆门市沙洋县	后港镇韩场村	常九香	13777990348	5	1	0	2	2	2	1	2	53	33	0	2	0	0	0	2	1	55	35	0	12	0	4	1
840	SY0416	何羽佳	赵雯歆	湖北省荆门市沙洋县	后港镇韩场村	郭邦翠	15908667752	3	0	0	2	2	2	1	2	46	26	0	12	0	0	0	2	1	48	28	0	12	0	3
841	SY0417	何羽佳	赵雯歆	湖北省荆门市沙洋县	后港镇韩场村	张道财	13469771691	4	0	0	2	2	2	1	1	58	38	0	12	1	1	1	2	2	57	37	0	12	0	0	0
842	SY0418	何羽佳	赵雯歆	湖北省荆门市沙洋县	后港镇韩场村	张德权	15629429297	5	1	1	2	2	2	1	1	48	28	1	5	1	0	0	2	2	46	26	1	5	0	0	0
843	SY0419	何羽佳	赵雯歆	湖北省荆门市沙洋县	后港镇韩场村	凡泰良	15807261238	5	2	1	2	2	2	1	1	68	48	0	12	1	1	0	2	2	67	47	1	6	0	0	0
844	JL01	杨健	赵雯歆	湖北省荆州市监利市	网市镇北口村	周凤香	13598774857	3	0	0	2	2	2	1	2	50	3	0	6	0	0	0	2	1	51	3	0	6	0	0	0
845	JL02	杨健	赵雯歆	湖北省荆州市监利市	网市镇北口村	成虎庭		6	2	1	2	2	2	1	1	70	50	0	3	0	0	0	2	2	69	50	0	6	0	0	0
846	SY0420	何羽佳	赵雯歆	湖北省荆门市沙洋县	后港镇韩场村	李守江	13093229181	4	1	0	3	3	3	1	1	64	44	0	6	0	0	0	2	2	63	43	0	6	0	4	4
847	SY0517	何羽佳	赵雯歆	湖北省荆门市沙洋县	毛李镇毛李村	刘启秀	13797893492	2	0	0	2	2	1	1	2	53	33	1	6	0	0	0
848	SY0518	何羽佳	赵雯歆	湖北省荆门市沙洋县	毛李镇毛李村	李兴玉	13297624809	3	0	0	2	2	2	1	2	50	30	0	12	0	0	0	2	1	54	34	0	12	0	2	1
849	SY0519	何羽佳	赵雯歆	湖北省荆门市沙洋县	毛李镇毛李村	张向军	18986981520	8	1	0	8	4	2	1	1	65	45	0	12	0	0	0	2	2	61	41	0	2	0	0	0
850	SY0520	何羽佳	赵雯歆	湖北省荆门市沙洋县	毛李镇毛李村	陈启吉	13597990568	2	0	0	2	2	2	1	1	58	38	0	12	0	0	0	2	2	56	36	0	12	0	0	0
851	SS01	杨健	赵雯歆	湖北省荆州市石首市	高基庙镇津南村	贺义学		6	0	0	2	2	2	1	1	62	40	0	6	0	0	0	2	2	59	40	0	6	0	0	0
852	SS01	杨健	赵雯歆	湖北省荆州市石首市	高基庙镇津南村	喻必文	15826616824	8	0	1	2	2	1	1	1	61	40	0	6	0	0	0	2	2	57	40	0	0	0	0	0
853	SS01	杨健	赵雯歆	湖北省荆州市石首市	高基庙镇津南村	涂贻春	13345806565	3	0	1	1	1	1	1	1	54	22	0	6	1	0	0
854	SS01	杨健	赵雯歆	湖北省荆州市石首市	高基庙镇津南村	贺学昌	13807218321	6	1	0	2	2	2	1	1	67	40	1	3	0	0	0	2	2	64	40	0	0	0	0	0
855	SS01	杨健	赵雯歆	湖北省荆州市石首市	高基庙镇津南村	刘		4	1	0	1	3	1	1	1	72	50	0	4	0	0	0
856	SS02	杨健	赵雯歆	湖北省荆州市石首市	高基庙镇百子庵村	王珍香		6	1	0	2	2	2	1	2	64	20	0	4	0	0	0	1	1	67	20	0	4	0	0	0
857	SS02	杨健	赵雯歆	湖北省荆州市石首市	高基庙镇百子庵村	付广灵		5	2	0	2	2	2	1	1	73	50	0	6	0	0	0	2	2	71	50	0	6	0	0	0
858	SS03	杨健	赵雯歆	湖北省荆州市石首市	团山寺镇过脉岭村	刘忠红	13308611721	2	0	0	2	2	2	1	2	59	30	0	5	0	0	0	2	1	59	30	0	8	0	0	0
859	SS03	杨健	赵雯歆	湖北省荆州市石首市	团山寺镇过脉岭村	黄三斌	16527161551	3	1	0	3	1	1	2	1	58	40	0	9	0	0	0
860	SS03	杨健	赵雯歆	湖北省荆州市石首市	团山寺镇过脉岭村	朱育之		4	0	0	2	2	2	1	1	65	42	0	6	0	0	0	2	2	62	40	0	6	0	0	0
861	SS03	杨健	赵雯歆	湖北省荆州市石首市	团山寺镇过脉岭村	林	13647167506	8	0	0	2	2	2	1	1	60	40	1	9	1	0	0	2	2	58	40	0	6	0	0	0
862	SS03	杨健	赵雯歆	湖北省荆州市石首市	团山寺镇过脉岭村	苏玉青	15629815338	6	0	1	6	5	1	1	2	56	30	0	0	0	0	0
863	SS03	杨健	赵雯歆	湖北省荆州市石首市	团山寺镇过脉岭村	成小红	15826653095	10	1	0	4	3	1	1	2	60	40	1	12	0	0	0
864	SS03	杨健	赵雯歆	湖北省荆州市石首市	团山寺镇过脉岭村	田孝军		4	0	0	2	4	2	1	1	62	52	0	3	0	0	0	2	2	57	41	0	0	0	0	0
865	SS04	杨健	赵雯歆	湖北省荆州市石首市	团山寺镇长安村	朱业平		7	0	0	2	2	1	1	1	61	40	0	12	0	0	0	2	2	58	40	0	12	0	0	0
866	SS04	杨健	赵雯歆	湖北省荆州市石首市	团山寺镇长安村	席生		8	1	0	1	8	1	1	1	74	60	0	2	0	0	0
867	SS05	杨健	赵雯歆	湖北省荆州市石首市	团山寺镇曹家场村	刘珍兵		6	1	1	2	2	1	1	1	65	40	0	9	0	0	0
868	SS05	杨健	赵雯歆	湖北省荆州市石首市	团山寺镇曹家场村	胡南彩		1	1	0	1	1	1	1	1	65	40	0	0	0	0	0
869	SS05	杨健	赵雯歆	湖北省荆州市石首市	团山寺镇曹家场村	郭凤川		4	1	1	1	1	3	1	1	78	50	0	6	1	0	0
870	SS05	杨健	赵雯歆	湖北省荆州市石首市	团山寺镇曹家场村	王平华		5	1	0	2	2	2	1	1	65	55	1	2	0	0	0	2	2	60	20	0	0	0	0	0
871	SY0118	陈雨岚	赵雯歆	湖北省荆门市沙洋县	五里铺镇陈池村	杜风强	13797990221	3	0	0	2	3	2	1	1	54	30	1	9	0	2	4	2	2	53	30	1	6	0	0	0
872	SY0119	陈雨岚	赵雯歆	湖北省荆门市沙洋县	五里铺镇陈池村	陈祥	13797940131	3	0	0	2	2	1	1	1	51	28	0	9	0	12	2
873	SY0120	陈雨岚	赵雯歆	湖北省荆门市沙洋县	五里铺镇陈池村	陈桂春	15871994978	2	2	0	2	1	1	1	1	67	50	0	6	0	0	0
874	SY0121	陈雨岚	赵雯歆	湖北省荆门市沙洋县	五里铺镇陈池村	陈红梅	13797909969	4	0	0	2	4	2	1	2	56	40	0	6	0	12	1	2	1	60	50	1	6	0	0	0
875	SY0215	陈雨岚	赵雯歆	湖北省荆门市沙洋县	五里铺镇赵集村	周正山	15867846484	4	0	0	1	2	2	1	1	58	45	1	6	0	0	0	2	2	57	44	1	6	0	0	0
876	SY0216	陈雨岚	赵雯歆	湖北省荆门市沙洋县	五里铺镇赵集村	李长云	13093214936	5	1	1	3	3	1	1	1	65	50	0	9	0	0	0
877	SY0217	陈雨岚	赵雯歆	湖北省荆门市沙洋县	五里铺镇赵集村	陈绍梁	13593794965	5	0	0	3	4	2	1	1	52	30	1	9	0	0	0	2	2	51	30	0	12	1	0	0
878	SY0218	陈雨岚	赵雯歆	湖北省荆门市沙洋县	五里铺镇赵集村	赵兰芳	19971534180	2	0	0	2	2	2	1	2	57	39	1	12	0	0	0	2	1	56	38	0	9	0	0	0
879	SY0219	陈雨岚	赵雯歆	湖北省荆门市沙洋县	五里铺镇赵集村	赵先军	15107263659	6	0	0	2	2	2	1	1	62	40	0	6	0	0	0	2	2	59	40	0	6	0	0	0
880	SY0312	陈雨岚	赵雯歆	湖北省荆门市沙洋县	后港镇李台村	曾宪章	13098433559	2	2	0	2	2	1	1	1	69	53	0	3	0	0	0
881	SY0313	陈雨岚	赵雯歆	湖北省荆门市沙洋县	后港镇李台村	张京林	13093222240	5	0	1	5	1	1	1	1	35	4	0	12	0	0	0
882	SY0314	陈雨岚	赵雯歆	湖北省荆门市沙洋县	后港镇李台村	张银涛	13774056151	2	0	0	2	2	2	1	1	58	38	0	12	0	0	0	2	2	56	36	0	12	0	0	0
883	SY0315	陈雨岚	赵雯歆	湖北省荆门市沙洋县	后港镇李台村	张黎	15327491391	4	0	0	2	2	1	1	1	50	36	1	8	1	0	0
884	SY0421	陈雨岚	赵雯歆	湖北省荆门市沙洋县	后港镇韩场村	文后育	15918298728	2	0	0	2	2	2	1	1	70	55	1	9	0	3	1	2	2	70	55	1	0	0	0	0
885	XS0201	桑贤策	赵雯歆	湖北省黄冈市浠水县	兰溪镇三泉村	冯金民		3	2	0	3	3	1	1	1	70	50	0	6	0	0	0
886	XS0202	桑贤策	赵雯歆	湖北省黄冈市浠水县	兰溪镇三泉村	孙传瑞	1349814670	2	2	1	2	2	2	1	1	68	50	0	6	0	2	1	2	2	65	45	0	0	0	0	0
887	XS0203	桑贤策	赵雯歆	湖北省黄冈市浠水县	兰溪镇三泉村	李先志	15347165970	2	1	0	2	2	2	1	2	63	40	1	6	1	0	0	2	1	65	40	1	0	0	0	0
888	XS0204	桑贤策	赵雯歆	湖北省黄冈市浠水县	兰溪镇三泉村	冯斗余		2	2	0	2	2	2	1	1	76	56	0	7	0	0	0	2	2	78	60	1	0	0	0	0
889	XS0205	桑贤策	赵雯歆	湖北省黄冈市浠水县	兰溪镇三泉村	冯秀兰		6	2	0	2	4	2	1	2	69	50	1	0	0	0	0	2	1	73	55	0	0	0	0	0
890	XS0301	桑贤策	赵雯歆	湖北省黄冈市浠水县	清泉镇三台山村	司庆春		5	2	0	4	1	1	1	1	53	5	0	9	0	0	0
891	XS0401	桑贤策	赵雯歆	湖北省黄冈市浠水县	关口镇凉亭村	郭建峰	13607250327	3	0	0	2	3	2	1	1	49	30	0	9	1	0	0	2	2	48	30	0	9	0	0	0
892	XS0402	桑贤策	赵雯歆	湖北省黄冈市浠水县	关口镇凉亭村	郭章言	18062213901	1	1	0	1	1	1	1	1	76	55	0	9	0	0	0
893	XS0403	桑贤策	赵雯歆	湖北省黄冈市浠水县	关口镇凉亭村	朱油毛	13597542477	3	1	0	3	2	2	1	1	55	35	0	9	0	2	1	2	2	50	30	0	6	0	0	0
894	XS0404	桑贤策	赵雯歆	湖北省黄冈市浠水县	关口镇凉亭村	王郭新		5	1	0	4	4	2	1	2	46	20	0	0	0	0	0	2	1	45	20	0	3	0	4	3
895	XS0405	桑贤策	赵雯歆	湖北省黄冈市浠水县	关口镇凉亭村	郭镇江	13636054212	5	1	0	1	4	1	1	1	67	50	0	9	1	0	0
896	XS0406	桑贤策	赵雯歆	湖北省黄冈市浠水县	关口镇凉亭村	朱雨风	18064177296	10	2	2	2	5	1	1	2	60	40	0	2	0	0	0
897	XS0407	桑贤策	赵雯歆	湖北省黄冈市浠水县	关口镇凉亭村	钟希金	13597596342	2	2	0	2	2	2	1	1	64	45	1	6	0	0	0	2	2	59	40	1	6	0	0	0
898	XS0408	桑贤策	赵雯歆	湖北省黄冈市浠水县	关口镇凉亭村	葛晓林		5	2	1	3	4	2	1	1	63	40	1	9	0	2	1	2	2	59	40	0	6	0	0	0
899	XS0409	桑贤策	赵雯歆	湖北省黄冈市浠水县	关口镇凉亭村	郭应明		7	2	0	2	4	2	1	1	68	45	1	6	0	0	0	2	2	60	40	0	9	0	0	0
900	XS0410	桑贤策	赵雯歆	湖北省黄冈市浠水县	关口镇凉亭村	张利船	13872067295	6	2	0	2	4	2	1	2	69	50	1	0	0	0	0	2	1	73	55	0	0	0	0	0
901	XS0411	桑贤策	赵雯歆	湖北省黄冈市浠水县	关口镇凉亭村	郭修阮	18934659549	8	2	0	4	6	2	1	1	68	50	0	9	0	0	0	2	2	62	40	0	0	0	0	0
902	XS0601	桑贤策	赵雯歆	湖北省黄冈市浠水县	洗马镇河东村	何建国	15807252695	6	0	1	5	4	1	1	1	58	40	0	12	1	0	0
903	XS0602	桑贤策	赵雯歆	湖北省黄冈市浠水县	洗马镇河东村	吴新义	19972892330	6	2	0	2	4	2	1	1	72	55	0	9	0	0	0	2	2	67	50	0	0	0	0	0
904	XS0603	桑贤策	赵雯歆	湖北省黄冈市浠水县	洗马镇河东村	侯水云		5	1	0	1	3	1	1	1	68	50	0	6	1	0	0
905	TF0111	钟小淼	钟小淼	湖北省黄冈市团风县	总路咀镇卢家榜村	王华清	19972591232	5	0	1	3	4	1	1	1	63	45	1	5	1	0	0	2	2	57	37	1	4	0	0	0
906	TF0211	钟小淼	钟小淼	湖北省黄冈市团风县	总路咀镇双河口村	余国平	13294274146	3	2	0	3	2	2	1	1	65	40	0	7	0	0	0	3	1	36	2	0	9	0	10	5
907	TF0212	钟小淼	钟小淼	湖北省黄冈市团风县	总路咀镇双河口村	余解章	16527133133	8	2	0	5	6	2	1	1	69	51	1	6	0	0	0	2	2	67	49	1	0	0	0	0
908	TF0213	钟小淼	钟小淼	湖北省黄冈市团风县	总路咀镇双河口村	孙楚旺	16517268830	2	1	0	2	1	1	1	1	69	51	1	12	0	3	1	2	2	67	49	1	0	0	0	0
909	TF0214	钟小淼	钟小淼	湖北省黄冈市团风县	总路咀镇双河口村	邵腊连	15571387787	9	2	0	4	3	1	1	2	68	5	1	3	0	0	0
910	TF0215	钟小淼	钟小淼	湖北省黄冈市团风县	总路咀镇双河口村	余菊花		7	2	1	6	2	1	2	1	66	48	1	12	0	2	5
911	TF0216	钟小淼	钟小淼	湖北省黄冈市团风县	总路咀镇双河口村	余秀文	13477682179	7	2	0	2	5	2	1	2	63	45	1	4	0	0	0	2	1	65	47	0	8	0	0	0
912	TF0217	钟小淼	钟小淼	湖北省黄冈市团风县	总路咀镇双河口村	余启高	13092729178	7	1	1	1	1	1	1	1	57	35	0	5	1	0	0
913	TF0311	钟小淼	钟小淼	湖北省黄冈市团风县	马曹庙镇大路岗村	吕园	13487059287	7	1	2	4	3	2	1	1	29	14	0	0	0	0	0	4	2	50	32	1	0	0	0	0
914	TF0312	钟小淼	钟小淼	湖北省黄冈市团风县	马曹庙镇大路岗村	管龙	15342409100	3	0	0	3	3	1	1	1	50	25	1	12	0	0	0
915	TF0313	钟小淼	钟小淼	湖北省黄冈市团风县	马曹庙镇大路岗村	周玉安	13636087427	4	0	0	2	4	2	1	1	56	40	0	12	1	0	0	2	2	55	40	0	6	0	0	0
916	TF0411	钟小淼	钟小淼	湖北省黄冈市团风县	马曹庙镇桥子畈村	王春莹	18007258037	7	0	1	5	5	3	1	2	55	30	0	7	0	0	0	2	1	57	32	1	9	0	0	0	3	1	26	10	0	8	0	0	0
917	TF0412	钟小淼	钟小淼	湖北省黄冈市团风县	马曹庙镇桥子畈村	曹良明	13237204686	2	2	0	2	2	2	1	1	66	48	0	2	0	0	0	2	2	63	45	1	12	0	0	0
918	TF0413	钟小淼	钟小淼	湖北省黄冈市团风县	马曹庙镇桥子畈村	周大张	15071761285	3	0	0	2	2	2	1	2	58	40	1	7	0	0	0	2	1	58	40	1	5	0	0	0
919	TF0511	钟小淼	钟小淼	湖北省黄冈市团风县	马曹庙镇沙河图村	阮光明	13409671214	2	2	0	2	1	1	1	1	76	58	1	0	0	0	0
920	TF0512	钟小淼	钟小淼	湖北省黄冈市团风县	马曹庙镇沙河图村	徐艳章	18516775120	4	0	0	2	2	1	1	1	60	42	1	4	0	2	1
921	TF0513	钟小淼	钟小淼	湖北省黄冈市团风县	马曹庙镇沙河图村	卢秀明	18040612575	3	2	0	3	1	1	1	1	74	56	1	5	0	0	0
922	TF0514	钟小淼	钟小淼	湖北省黄冈市团风县	马曹庙镇沙河图村	卢炳新	15337311823	6	2	0	4	1	1	1	1	76	58	1	3	0	0	0
923	TF0515	钟小淼	钟小淼	湖北省黄冈市团风县	马曹庙镇沙河图村	陈桂梅		2	0	0	2	1	1	1	2	59	41	1	5	0	0	0
924		钟小淼	钟小淼	湖北省黄冈市团风县	团风镇徐家楼村	傅喜军	13972732216	4	1	0	3	2	2	1	1	48	30	0	12	0	0	0	2	2	41	23	0	12	0	0	0
925		钟小淼	钟小淼	湖北省黄冈市团风县	团风镇翏叶咀村	占仲清	13636036896	6	0	0	5	2	1	1	1	59	41	0	9	0	0	0
926		钟小淼	钟小淼	湖北省黄冈市团风县	淋山河镇孙家山村	冯晚张	13871970344	5	0	1	4	1	1	1	1	62	44	0	12	0	12	1
927	XS0111	钟小淼	钟小淼	湖北省黄冈市浠水县	兰溪镇盐客树村	李如才		5	1	0	3	2	2	1	1	67	49	1	0	0	0	0	2	2	57	39	1	0	0	0	0
928	XS0112	钟小淼	钟小淼	湖北省黄冈市浠水县	兰溪镇盐客树村	张修宝	15972855154	4	0	0	2	3	1	1	1	62	30	1	12	0	3	1
929	XS0113	钟小淼	钟小淼	湖北省黄冈市浠水县	兰溪镇盐客树村	张国华	13636065858	4	0	0	1	1	1	1	1	56	25	0	9	0	3	1
930	XS0114	钟小淼	钟小淼	湖北省黄冈市浠水县	兰溪镇盐客树村	程春归		6	0	0	5	3	1	1	2	58	40	0	7	0	1	1
931	XS0211	钟小淼	钟小淼	湖北省黄冈市浠水县	兰溪镇三泉村	张冬华	13972727129	4	0	0	2	0	0	1	1	56	38	0	12	1	0	0	2	2	53	35	0	9	0	0	0
932	XS0212	钟小淼	钟小淼	湖北省黄冈市浠水县	兰溪镇三泉村	冯春容	13922445058	3	1	0	1	1	1	1	2	58	40	1	3	0	0	0
933	XS0213	钟小淼	钟小淼	湖北省黄冈市浠水县	兰溪镇三泉村	冯小民	13597562419	6	2	0	2	1	1	1	1	71	53	1	6	0	0	0
934	XS0214	钟小淼	钟小淼	湖北省黄冈市浠水县	兰溪镇三泉村	冯少松	13297567885	10	2	0	9	4	2	1	1	66	48	0	3	0	0	0	2	2	63	45	1	0	0	0	0
935	XS0311	钟小淼	钟小淼	湖北省黄冈市浠水县	清泉镇三台山村	司了远	13085211721	10	2	0	4	2	1	1	1	68	50	0	3	0	0	0
936	XS0511	钟小淼	钟小淼	湖北省黄冈市浠水县	关口镇长流村	郭敬颂	18934659530	6	0	2	5	2	2	1	1	56	38	0	12	0	0	0
937	XS0512	钟小淼	钟小淼	湖北省黄冈市浠水县	关口镇长流村	郭丰	13995927563	6	2	1	2	2	1	1	1	67	49	1	5	0	0	0
938	XS0513	钟小淼	钟小淼	湖北省黄冈市浠水县	关口镇长流村	张金元	15098034228	6	2	0	4	3	1	1	1	74	56	1	6	0	0	0
939	XS0514	钟小淼	钟小淼	湖北省黄冈市浠水县	关口镇长流村	郭强斌	15171661192	6	2	0	2	2	2	1	1	72	54	1	6	0	0	0	2	2	70	52	1	6	0	0	0
940	XS0515	钟小淼	钟小淼	湖北省黄冈市浠水县	关口镇长流村	徐玉芬	15171665352	6	2	1	2	4	1	1	2	68	50	1	0	0	0	0
941	XS0516	钟小淼	钟小淼	湖北省黄冈市浠水县	关口镇长流村	瞿水元		6	2	0	2	1	1	1	1	56	38	0	0	0	0	0
942	XS0517	钟小淼	钟小淼	湖北省黄冈市浠水县	关口镇长流村	李中心	13971736764	2	2	0	2	1	1	1	1	75	57	1	9	0	0	0
943	XS0518	钟小淼	钟小淼	湖北省黄冈市浠水县	关口镇长流村	李丙军	13636072433	8	2	2	4	3	2	1	1	75	57	1	6	0	0	0	2	2	77	59	1	0	0	0	0
944	XS0519	钟小淼	钟小淼	湖北省黄冈市浠水县	关口镇长流村	李汉雄	13469917922	4	0	1	2	1	1	1	1	57	39	1	8	1	0	0
945	XS0611	钟小淼	钟小淼	湖北省黄冈市浠水县	洗马镇河东村	胡菊云	13277205305	2	0	0	2	2	2	1	2	51	33	1	0	1	1	1
946	XS0612	钟小淼	钟小淼	湖北省黄冈市浠水县	洗马镇河东村	张三仁	17372829592	4	0	0	2	3	2	1	2	55	37	0	4	0	0	0	2	1	56	38	0	3	0	2	4
947	XS0613	钟小淼	钟小淼	湖北省黄冈市浠水县	洗马镇河东村	裴文新	18986520708	6	1	0	6	1	1	1	1	63	45	1	2	0	1	1
948	XS0614	钟小淼	钟小淼	湖北省黄冈市浠水县	洗马镇河东村	叶援朝	18942116590	6	1	0	6	2	1	1	1	70	52	1	0	0	0	0
949	XS0615	钟小淼	钟小淼	湖北省黄冈市浠水县	洗马镇河东村	裴长江	13399511151	7	1	2	5	2	2	1	1	68	50	0	6	0	0	0	2	2	65	47	0	6	0	0	0
950	XS0616	钟小淼	钟小淼	湖北省黄冈市浠水县	洗马镇河东村	李明清	13635877973	3	1	0	2	2	1	1	1	65	47	1	12	0	0	0
951	QJ010	唐林	钟小淼	湖北省潜江市	龙湾镇郑家湖村	陈贻海		2	1	0	2	1	1	1	1	47	30	0	6	0	0	0
952	QJ010	唐林	钟小淼	湖北省潜江市	龙湾镇郑家湖村	尹登高		5	0	0	2	4	2	1	1	62	40	0	9	0	0	0
953	QJ011	余威震	钟小淼	湖北省潜江市	积玉口镇积玉村	张正新	13098338420	3	1	0	3	2	1	1	1	64	44	0	12	0	0	0
954	QJ011	余威震	钟小淼	湖北省潜江市	积玉口镇积玉村	张龙江	13593946580	4	0	1	3	3	2	1	1	58	10	0	7	0	12	3
955	QJ011	余威震	钟小淼	湖北省潜江市	积玉口镇积玉村	张兴虎	13367211960	6	0	2	4	4	2	1	1	59	39	1	9	0	0	0
956	QJ012	余威震	钟小淼	湖北省潜江市	积玉口镇直属村	董加亮	13117242368	7	1	2	7	4	1	1	1	51	31	0	9	1	12	1
957	QJ012	余威震	钟小淼	湖北省潜江市	积玉口镇直属村	徐福元	15586293352	5	0	0	3	4	2	1	1	61	41	0	5	0	12	1
958	QJ012	余威震	钟小淼	湖北省潜江市	积玉口镇直属村	陈必德	13886952202	6	0	1	4	4	2	1	1	64	44	0	9	0	2	3
959	QJ013	余威震	钟小淼	湖北省潜江市	浩口镇莲子垸村	卢忠龙	15337374738	3	1	0	3	2	1	1	1	50	30	1	0	1	12	1
960	QJ014	余威震	钟小淼	湖北省潜江市	浩口镇观音村	汤明明	15271207735	5	0	0	5	4	1	1	1	34	10	0	9	0	0	0
961	QJ014	余威震	钟小淼	湖北省潜江市	浩口镇观音村	余书平	15271177923	3	0	0	2	3	2	1	1	55	2	1	9	0	0	0
962	QJ011	余威震	钟小淼	湖北省潜江市	积玉口镇积玉村	张业军	13385201150	3	0	0	2	3	2	1	1	50	30	0	9	1	12	1
963	QJ010	余威震	钟小淼	湖北省潜江市	龙湾镇郑家湖村	郑杰	13094294980	3	0	0	2	3	2	1	1	55	35	0	9	0	0	0
964	QJ010	余威震	钟小淼	湖北省潜江市	龙湾镇郑家湖村	郑清平	18368283029	5	2	0	5	4	2	1	1	46	0	0	6	0	0	0
965	QJ010	余威震	钟小淼	湖北省潜江市	龙湾镇郑家湖村	陈贻雄	13277450505	4	0	0	2	2	2	1	2	47	15	0	9	0	0	0
966	QJ010	余威震	钟小淼	湖北省潜江市	龙湾镇郑家湖村	翁孝国	19972802292	5	0	0	5	4	1	1	1	3	3	0	9	1	12	1
967	QJ010	余威震	钟小淼	湖北省潜江市	龙湾镇郑家湖村	黄原波	13339720159	6	0	0	4	4	1	1	1	37	5	0	9	0	12	1
968	QJ008	余威震	钟小淼	湖北省潜江市	老新镇赤生村	张言邦	13886963084	4	0	0	2	4	2	1	1	63	43	0	6	0	0	0	2	2	30	40	0	6	0	0	0
969	QJ008	余威震	钟小淼	湖北省潜江市	老新镇赤生村	龚文化	13593900625	5	1	0	3	4	2	1	1	53	33	0	9	0	2	1	2	2	53	33	0	6	0	0	0
970	QJ008	余威震	钟小淼	湖北省潜江市	老新镇赤生村	王德洪	13117123098	5	0	0	2	1	2	1	1	61	41	0	5	1	12	1
971	SY0422	陈雨岚	钟小淼	湖北省荆门市沙洋县	后港镇韩场村	熊志发	13774025820	1	0	0	1	1	1	1	1	63	25	0	12	0	4	3
972	SY0423	陈雨岚	钟小淼	湖北省荆门市沙洋县	后港镇韩场村	韩昌林	15327536980	3	2	0	3	2	2	1	1	69	51	0	9	0	0	0	2	2	67	48	0	6	0	0	0
973	SY0424	陈雨岚	钟小淼	湖北省荆门市沙洋县	后港镇韩场村	王以财	13597987067	2	0	0	2	0	0	1	1	53	43	0	9	0	8	3	2	2	50	40	0	6	0	0	0
974	SY0425	陈雨岚	钟小淼	湖北省荆门市沙洋县	后港镇韩场村	王军	13797908876	4	0	0	3	2	2	1	1	43	22	0	15	1	12	1	2	2	36	16	0	9	0	0	0
975	SY0426	陈雨岚	钟小淼	湖北省荆门市沙洋县	后港镇韩场村	谭洪银	13237284494	4	0	1	4	2	2	1	1	57	40	1	9	0	1	4	2	2	57	40	0	9	0	0	0
976	JS0108	何羽佳	钟小淼	湖北省荆门市京山市	雁门口镇瓦庙村	王元清	17707216756	6	2	1	2	2	2	1	1	68	41	0	12	0	0	0	2	2	64	41	0	6	0	0	0
977	JS0109	何羽佳	钟小淼	湖北省荆门市京山市	雁门口镇瓦庙村	张光华	13627157764	3	0	0	2	3	2	1	1	64	43	0	12	0	0	0	2	2	58	40	1	6	0	0	0
978	JS0208	何羽佳	钟小淼	湖北省荆门市京山市	雁门口镇白虎村	刘红平	13986982587	3	0	0	2	2	1	1	1	41	12	0	15	1	0	0	2	2	40	0	0	13	0	12	1
979	JS0209	何羽佳	钟小淼	湖北省荆门市京山市	雁门口镇白虎村	成博	13797983592	6	0	2	2	4	2	1	1	63	45	0	12	1	0	0	2	2	61	43	0	0	0	0	0
980	JS0210	何羽佳	钟小淼	湖北省荆门市京山市	雁门口镇白虎村	成爱军	15972623245	5	0	1	2	2	1	1	1	50	30	0	0	0	0	0	2	2	50	25	1	0	0	12	1
981	JS0211	何羽佳	钟小淼	湖北省荆门市京山市	雁门口镇白虎村	郑万圣	15807268561	6	1	0	4	4	2	1	1	60	43	0	12	0	3	1	2	2	59	43	0	12	0	0	0
982	JS0212	何羽佳	钟小淼	湖北省荆门市京山市	雁门口镇白虎村	曾令学	18872436395	6	0	1	4	4	2	1	1	56	36	1	12	0	0	0	2	2	57	37	1	6	0	0	0
983	JS0308	何羽佳	钟小淼	湖北省荆门市京山市	雁门口镇中南山村	曹彩平	15872900585	4	1	0	3	2	2	1	1	49	20	0	12	0	3	2	2	2	47	20	0	12	0	0	0
984	JS0309	何羽佳	钟小淼	湖北省荆门市京山市	雁门口镇中南山村	叶运红	15972625132	4	0	0	2	3	2	1	1	50	25	1	12	1	0	0	2	2	48	20	0	6	0	0	0
985	JS0310	何羽佳	钟小淼	湖北省荆门市京山市	雁门口镇中南山村	董朝华	18986975903	4	2	0	4	2	2	1	1	71	50	1	4	0	0	0	2	2	69	50	1	1	0	0	0
986	JS0406	何羽佳	钟小淼	湖北省荆门市京山市	曹武镇顾家场村	王和平	18371146470	2	0	0	2	2	2	1	1	58	43	0	6	0	6	0	2	2	56	40	0	12	0	0	0
987	JS0407	何羽佳	钟小淼	湖北省荆门市京山市	曹武镇顾家场村	王治军	13797894685	8	2	2	7	3	2	1	1	55	40	1	12	0	0	0	2	2	55	40	1	6	0	0	0
988	JS0408	何羽佳	钟小淼	湖北省荆门市京山市	曹武镇顾家场村	顾还元	13971853662	5	0	0	2	2	2	1	1	60	35	0	12	0	0	0	2	2	60	35	0	15	0	0	0
989	JS0506	何羽佳	钟小淼	湖北省荆门市京山市	曹武镇九房村	田兴国	15972645954	5	1	1	1	1	1	1	1	70	50	1	12	0	0	0
990	JS0507	何羽佳	钟小淼	湖北省荆门市京山市	曹武镇九房村	阳代斌	18872441849	6	2	0	2	5	2	1	1	75	55	1	12	0	0	0	2	2	75	55	0	12	0	0	0
991	JS0508	何羽佳	钟小淼	湖北省荆门市京山市	曹武镇谷家岭村	毛承霞	13774018037	3	2	0	2	3	2	1	2	67	50	1	12	0	0	0	2	1	71	50	1	15	0	0	0
992	JS0605	何羽佳	钟小淼	湖北省荆门市京山市	曹武镇谷家岭村	雷车冈	15071931591	5	0	0	4	3	2	1	1	55	42	1	5	0	2	5	2	2	55	40	1	3	0	0	0
993	JS0709	何羽佳	钟小淼	湖北省荆门市京山市	曹武镇民主村	田祖斌	13774053679	5	0	1	3	2	2	1	1	58	30	0	6	0	1	1	2	2	56	30	0	6	0	0	0
994	JS0710	何羽佳	钟小淼	湖北省荆门市京山市	曹武镇民主村	刘万清	13797944073	7	0	1	4	2	2	1	1	59	39	1	12	0	2	1	2	2	58	38	1	12	0	0	0
995	JS0711	何羽佳	钟小淼	湖北省荆门市京山市	曹武镇民主村	代明斌	15872965473	5	1	0	4	1	1	1	1	58	40	0	9	0	0	0
996	JS0712	何羽佳	钟小淼	湖北省荆门市京山市	曹武镇民主村	毛艾平	15908669409	5	0	0	3	2	1	1	1	62	42	0	15	0	2	1
997	JS0805	何羽佳	钟小淼	湖北省荆门市京山市	石龙镇蒲圻村	邹正兵	13310512180	8	2	0	3	2	2	1	1	65	45	1	12	0	0	0	2	2	65	45	1	6	0	0	0
998	JS0806	何羽佳	钟小淼	湖北省荆门市京山市	石龙镇蒲圻村	罗胜	13297608163	7	0	1	2	2	2	1	1	56	39	1	12	0	3	1	2	2	55	38	1	12	0	0	0
999	JS0807	何羽佳	钟小淼	湖北省荆门市京山市	石龙镇蒲圻村	韩士军	13797960685	7	1	1	7	4	2	1	1	57	37	1	12	0	0	0	2	2	56	36	1	12	0	0	0
1000	JS0808	何羽佳	钟小淼	湖北省荆门市京山市	石龙镇蒲圻村	万之才	18064289129	10	2	2	8	1	1	1	1	57	37	1	12	0	3	1
1001	SY0111	何羽佳	钟小淼	湖北省荆门市沙洋县	五里铺镇陈池村	刘会洲	13797921609	3	0	0	2	2	2	1	1	54	34	1	6	1	2	1	2	2	44	24	1	6	0	0	0
1002	SY0112	何羽佳	钟小淼	湖北省荆门市沙洋县	五里铺镇陈池村	杜壳成	13986987845	2	1	0	2	2	2	1	1	65	45	1	12	0	0	0	2	2	64	44	1	2	0	0	0
1003	SY0113	何羽佳	钟小淼	湖北省荆门市沙洋县	五里铺镇陈池村	阵壳华	13385247694	5	0	0	2	2	2	1	1	64	44	1	0	0	2	0	2	2	63	43	1	6	0	0	0
1004	SY0114	何羽佳	钟小淼	湖北省荆门市沙洋县	五里铺镇陈池村	陈秀玲	15337489325	2	0	0	2	2	2	1	2	51	29	1	12	0	0	0	2	1	51	29	1	12	1	0	0
1005	SY0115	何羽佳	钟小淼	湖北省荆门市沙洋县	五里铺镇陈池村	王杜林	13367237362	5	0	1	2	2	2	1	1	52	32	0	12	0	2	1	2	2	52	32	1	12	0	0	0
1006	SY0116	何羽佳	钟小淼	湖北省荆门市沙洋县	五里铺镇陈池村	陈银发		5	0	2	2	5	2	1	1	63	43	1	12	0	0	0	2	2	63	43	1	12	0	0	0
1007	SY0211	何羽佳	钟小淼	湖北省荆门市沙洋县	五里铺镇赵集村	雷孝文	15908682871	5	0	0	2	2	2	1	1	54	34	1	12	0	0	0	2	2	55	35	1	12	0	0	0
1008	SY0212	何羽佳	钟小淼	湖北省荆门市沙洋县	五里铺镇赵集村	叶晓林	15327500658	4	0	1	3	2	2	1	1	51	31	0	12	0	0	0	2	2	49	30	0	12	0	0	0
1009	SY0213	何羽佳	钟小淼	湖北省荆门市沙洋县	五里铺镇赵集村	赵海松	13277631938	3	0	0	2	2	2	1	1	50	30	1	12	0	0	0	2	2	43	23	1	12	0	3	1
1010	SY0214	何羽佳	钟小淼	湖北省荆门市沙洋县	五里铺镇赵集村	赵锋	13972896162	4	0	0	2	2	2	1	1	57	37	0	12	1	0	0	2	2	58	38	1	12	0	0	0
1011	SY0308	何羽佳	钟小淼	湖北省荆门市沙洋县	后港镇李台村	张以琴	19171580189	3	0	0	2	2	2	1	2	49	26	0	12	1	0	0	2	1	50	27	0	12	0	6	1
1012	SY0309	何羽佳	钟小淼	湖北省荆门市沙洋县	后港镇李台村	吴贵川	13469761196	3	0	0	2	2	2	1	1	48	28	0	12	0	4	4	2	2	45	25	0	12	0	0	0
1013	SY0310	何羽佳	钟小淼	湖北省荆门市沙洋县	后港镇李台村	刘得安	13197115588	2	0	0	2	2	2	1	1	71	51	0	12	1	0	0	2	2	67	47	0	0	0	0	0
1014	SY0311	何羽佳	钟小淼	湖北省荆门市沙洋县	后港镇李台村	李秀	13796513496	2	0	0	2	2	2	1	2	55	35	0	12	0	0	0	2	1	55	35	0	12	0	6	4
1015	SS05	代建林	聂峥嵘	湖北省荆州市石首市	团山寺镇曹家场村	郑先生		7	2	1	4	4	1	1	1	65	45	0	0	0	0
1016	SS05	代建林	聂峥嵘	湖北省荆州市石首市	团山寺镇曹家场村	刘先生		8	0	1	3	8	2	1	1	60	40	0	9	0	0
1017	SS05	代建林	聂峥嵘	湖北省荆州市石首市	团山寺镇曹家场村	徐先生		5	0	0	2	5	2	1	1	60	40	0	0	0	0
1018	SS04	代建林	聂峥嵘	湖北省荆州市石首市	团山寺镇长安村	潘先生		8	1	1	2	4	2	1	1	68	16	0	9	0	0
1019	SS04	代建林	聂峥嵘	湖北省荆州市石首市	团山寺镇长安村	赵		5	2	0	2	2	1	1	1	66	46	0	9	0	0
1020	SS04	代建林	聂峥嵘	湖北省荆州市石首市	团山寺镇长安村	张		5	2	0	3	2	2	1	1	45	15	0	15	1	0
1021	SS04	代建林	聂峥嵘	湖北省荆州市石首市	团山寺镇长安村	汪		5	0	0	2	5	2	1	1	58	43	0	9	0	0
1022	SS04	代建林	聂峥嵘	湖北省荆州市石首市	团山寺镇长安村	赵		6	2	0	4	2	1	1	1	54	34	0	12	0	0
1023	SS04	代建林	聂峥嵘	湖北省荆州市石首市	团山寺镇长安村	王		4	0	0	1	4	1	1	1	59	5	1	9	0	0
1024	SS01	代建林	聂峥嵘	湖北省荆州市石首市	高基庙镇津南村	夏		6	1	0	4	2	2	1	1	65	35	0	9	0	0		2	2	60	30	0	6	0	0
1025	SS01	代建林	聂峥嵘	湖北省荆州市石首市	高基庙镇津南村	黎定新	15972759721	6	2	0	6	2	2	1	1	43	5	0	12	0
1026	SS01	代建林	聂峥嵘	湖北省荆州市石首市	高基庙镇津南村	黎振松	13077183598	8	1	0	5	4	1	1	1	65	50	0	12	0			2	2	63	45	0	6	0
1027	SS01	代建林	聂峥嵘	湖北省荆州市石首市	高基庙镇津南村	陈		4	0	0	2	4	2	1	1	60	40	0	6	0	0		2	2	58	38	0	6	0	0
1028	SS02	代建林	聂峥嵘	湖北省荆州市石首市	高基庙镇百子庵村	彭		5	2	0	2	2	2	1	2	70	50	0	9	0	0		2	1	70	50	0	0	0	0
1029	SS02	代建林	聂峥嵘	湖北省荆州市石首市	高基庙镇百子庵村	刘先生		9	0	1	8	6	3	1	1	60	40	0	9	0	0		2	2	59	39	0	6	0	0		3	1	33	0	0	15	1	0
1030	SS02	代建林	聂峥嵘	湖北省荆州市石首市	高基庙镇百子庵村	周先生		6	0	1	6	4	4	1	1	63	43	0	9	0	0		2	2	60	43	0	6	0	0
1031	JL01	代建林	聂峥嵘	湖北省荆州市监利市	网市镇北口村	陈宗元		3	2	0	3	2	2	1	1	70	50	0	6	0	0		2	2	66	46	0	6	0	0
1032	JL01	代建林	聂峥嵘	湖北省荆州市监利市	网市镇北口村	郭		5	0	1	1	1	1	1	1	55	35	0	12	0	0		2	2	55	35	0	12	0	0		3	2	30	0	0	18	0	6	5
1033	JL01	代建林	聂峥嵘	湖北省荆州市监利市	网市镇北口村	罗		2	0	1	2	2	2	1	1	65	45	0	0	0	0		2	2	45	0	0	0	0	0		3	2	38	20	0	12	0	12	5
1034	JL02	代建林	聂峥嵘	湖北省荆州市监利市	网市镇万佛寺村	李		6	0	0	3	2	2	1	1	59	39	0	6	0	0		2	2	58	38	0	6	0	0		3	1	12	0	0	3	0	0
1035	JL02	代建林	聂峥嵘	湖北省荆州市监利市	网市镇万佛寺村	沈华新		2	2	0	2	2	2	1	1	80	60	0	6	0	0		2	2	78	58	0	6	0	0
1036	JL02	代建林	聂峥嵘	湖北省荆州市监利市	网市镇万佛寺村	李		3	0	0	2	2	2	1	2	51	31	0	6	0	0		2	1	53	33	0	6	0	0		3	1	20	0	0	12	0	0
1037	JL02	代建林	聂峥嵘	湖北省荆州市监利市	网市镇万佛寺村	李		2	0	0	2	2	2	1	1	60	40	0	6	0	0		2	2	60	40	0	6	0	0
1038	JL03	代建林	聂峥嵘	湖北省荆州市监利市	毛市镇崔吴村	姚		9	2	1	3	1	2	1	1	73	53	0	0	0	0		2	2	68	48	0	0	0	0
1039	JL03	代建林	聂峥嵘	湖北省荆州市监利市	毛市镇崔吴村	吴		6	0	0	2	4	2	1	1	61	13	0	9	0	0		2	2	59	13	0	0	0	0
1040	JL03	代建林	聂峥嵘	湖北省荆州市监利市	毛市镇崔吴村	姚		6	0	0	2	4	2	1	1	53	33	0	6	0	0		2	2	50	30	1	9	0	0
1041	JL03	代建林	聂峥嵘	湖北省荆州市监利市	毛市镇崔吴村	赵		10	0	0	2	2	2	1	1	59	39	0	6	0	0		2	2	59	39	0	6	0	0
1042	JL05	代建林	聂峥嵘	湖北省荆州市监利市	毛市镇杨湾村	冉		6	2	0	2	0	2	1	1	71	51	0	4	0	0		2	2	71	51	0	4	0	8
1043	JL05	代建林	聂峥嵘	湖北省荆州市监利市	毛市镇杨湾村	曹民孝		10	2	0	2			1	1	66	46	0	9	0	0		2	2	66	46	0	6	0
1044	JL05	代建林	聂峥嵘	湖北省荆州市监利市	毛市镇杨湾村	张		6	2	0	2	0	2	1	2	68	48	0	3	0	0		2	1	67	48	0	3	0	0
1045	JL05	代建林	聂峥嵘	湖北省荆州市监利市	毛市镇杨湾村	曺必章		4	1	0	2	2	2	1	1	50	30	0	16	1	0		2	2	47	27	0	9	0	0
1046	JL05	代建林	聂峥嵘	湖北省荆州市监利市	毛市镇杨湾村	曹广昌		8	2	0	4	2	2	1	1	73	53	0	6	0	8	1	2	2	72	52	0	0	0	8	1
1047	JL01	聂峥嵘	聂峥嵘	湖北省荆州市监利市	网市镇北口村	童德元		6	2	2	2	2	2	1	1	62	40	0	6	0	6	5	2	2	61	40	0	6	0	0
1048	JL01	聂峥嵘	聂峥嵘	湖北省荆州市监利市	网市镇北口村	安万志		5	1	0	4	2	2	1	1	58	30	0	9	0	0		2	2	50	30	0	6	0	0
1049	JL01	聂峥嵘	聂峥嵘	湖北省荆州市监利市	网市镇北口村	安开寿		7	0	0	5	2	2	1	1	62	42	1	6	0	0		2	2	63	42	0	6	0	0		3	1	38	0	0	15	0	12	5
1050	JL01	聂峥嵘	聂峥嵘	湖北省荆州市监利市	网市镇北口村	李珍		5	1	1	0	1	1	1	2	67	47	0	0	0	0		2	1	66	44	0	0	0	0		3	1	38	0	0	9	0	12	5
1051	JL01	聂峥嵘	聂峥嵘	湖北省荆州市监利市	网市镇北口村	邓厚强		5	0	1	3	2	2	1	1	63	23	0	6	0	0		2	2	63	30	0	6	0	0		3	1	34	0	0	9	0	11	5
1052	JL01	聂峥嵘	聂峥嵘	湖北省荆州市监利市	网市镇北口村	陈义元		6	2	0	4	2	2	1	1	67	47	1	4	0	4	5	2	2	66	40	0	1	0	0
1053	JL01	聂峥嵘	聂峥嵘	湖北省荆州市监利市	网市镇北口村	陈义志		6	2	1	3	2	2	1	1	66	46	1	4	0	0		2	2	66	42	1	4	0	0
1054	JL01	聂峥嵘	聂峥嵘	湖北省荆州市监利市	网市镇北口村	黄永福		6	1	2	4	2	2	1	1	65	45	0	12	0	0		2	2	63	43	0	0	0	0
1055	JL02	聂峥嵘	聂峥嵘	湖北省荆州市监利市	网市镇万佛寺村	黄永前		5	2	0	2	2	2	1	1	76	50	1	1	0			2	2	73	50	1	1	0	0		3	1	53	0	0	15	0	10	4
1056	JL02	聂峥嵘	聂峥嵘	湖北省荆州市监利市	网市镇万佛寺村	冯常云		7	0	0	4	3	2	1	1	62	17	0	12	0	0		2	2	62	30	0	3	0	0		3	1	38	0	0	9	0	10	5
1057	JL05	聂峥嵘	聂峥嵘	湖北省荆州市监利市	毛市镇杨湾村	曹必胜		6	0	1	5	2	2	1	1	60	40	0	12	0	6	1	2	2	60	40	0	0	0	6	1
1058	JL05	聂峥嵘	聂峥嵘	湖北省荆州市监利市	毛市镇杨湾村	饶承银		5	2	0	2	2	2	1	1	68	48	0	4	0	0		2	2	65	45	0	4	0	0
1059	JL05	聂峥嵘	聂峥嵘	湖北省荆州市监利市	毛市镇杨湾村	何德平	15826515796	5	0	0	2	2	2	1	1	61	41	0	6	0	0		2	2	62	42	1	5	0	0
1060	JL05	聂峥嵘	聂峥嵘	湖北省荆州市监利市	毛市镇杨湾村	杨诗德		10	0	2	2	2	2	1	1	59	40	0	9	0	3	1	2	2	58	35	0	6	0	1	1
1061	JL05	聂峥嵘	聂峥嵘	湖北省荆州市监利市	毛市镇杨湾村	何春桃		6	2	0	4	2	2	1	2	65	45	0	1	0	6	1	2	1	69	49	0	3	0	6	1
1062	JL03	聂峥嵘	聂峥嵘	湖北省荆州市监利市	毛市镇崔吴村	姚其武	15207211371	5	0	0	2	2	2	1	1	59	30	0	9	0	2		2	2	59	30	0	0	0	0
1063	JL03	聂峥嵘	聂峥嵘	湖北省荆州市监利市	毛市镇崔吴村	杨秋珠		8	0	1	3	3	3	1	2	55	30	0	2	0	10	5	2	1	54	30	0	9	0	10	5
1064	JL03	聂峥嵘	聂峥嵘	湖北省荆州市监利市	毛市镇崔吴村	姚延华		9	2	0	2	2	2	1	1	69	45	0	3	0	2	1	2	2	65	45	0	0	0	0
1065	JL03	聂峥嵘	聂峥嵘	湖北省荆州市监利市	毛市镇崔吴村	姚延财	15090716171	6	0	2	1	1	1	1	1	62	42	1	2	0	0		2	2	61	40	0	0	0	0		3	1	35	0	0	6	0	0
1066	SS02	聂峥嵘	聂峥嵘	湖北省荆州市石首市	高基庙镇百子庵村	胡进月		7	2	1	7	4	2	1	1	68	48	0	0	0	12	1
1067	SS02	聂峥嵘	聂峥嵘	湖北省荆州市石首市	高基庙镇百子庵村	吴菊秀		2	2	0	2	2	2	1	2	68	48	0	0	0	0		2	1	72	52	0	3	0	6
1068	SS05	聂峥嵘	聂峥嵘	湖北省荆州市石首市	团山寺镇曹家场村	许义平		6	2	0	3	1	1	1	1	50		0	6	0	6
1069	SS05	聂峥嵘	聂峥嵘	湖北省荆州市石首市	团山寺镇曹家场村	张双成		7	2	0	2	2	2	1	1	75	55	0	6	0	6	1	2	2	75	55	0	0	0	0
1070	SS04	聂峥嵘	聂峥嵘	湖北省荆州市石首市	团山寺镇长安村	张振旭	13627167597	5	2	0	4	3	1	1	1	70	50	0	6	0	0		2	2	70	50	1	6	0	0
1071	SS04	聂峥嵘	聂峥嵘	湖北省荆州市石首市	团山寺镇长安村	罗有新	17362594173	2	0	0	2	2	2	1	1	62	40	0	12	0	1	1	2	1	58	38	0	6	0	0
1072	SS04	聂峥嵘	聂峥嵘	湖北省荆州市石首市	团山寺镇长安村	袁本华		6	0	0	3	2	2	1	1	56	36	0	6	0	12	1
1073	SS04	聂峥嵘	聂峥嵘	湖北省荆州市石首市	团山寺镇长安村	王爱民	15927759034	4	0	0	3	2	2	1	1	53	33	0	6	0	12	1
1074	SS04	聂峥嵘	聂峥嵘	湖北省荆州市石首市	团山寺镇长安村	张先荣	1867251688	3	0	0	1	3	1	1	1	55	35	0	9	0	0
1075	SS04	聂峥嵘	聂峥嵘	湖北省荆州市石首市	团山寺镇长安村	喻志雄	13872205141	3	2	0	3	2	2	1	1	71	51	0	7	0	0
1076	SS01	聂峥嵘	聂峥嵘	湖北省荆州市石首市	高基庙镇津南村	陈升见		4	1	1	2	2	2	1	1	65	45	0	9	0	0		2	2	63	43	0	6	0	0
1077	SS01	聂峥嵘	聂峥嵘	湖北省荆州市石首市	高基庙镇津南村	张译林	15090734192	6	0	1	5	4	1	1	1	60	40	0	9	0	0		2	2	58	38	0	9	0	0		3	1	34	0	0	11	0	12	5
1078	SS01	聂峥嵘	聂峥嵘	湖北省荆州市石首市	高基庙镇津南村	李元香		4	0	0	1	1	1	1	1	51	20	0	3	0	6	3
1079	SS01	聂峥嵘	聂峥嵘	湖北省荆州市石首市	高基庙镇津南村	吴道华	13886552093	3	0	0	1	1	1	1	1	55	40	1	9	0	0		2	2	50	20	0	4	0	0		3	1	23	0	0	16	0	10	4
1080	SS01	聂峥嵘	聂峥嵘	湖北省荆州市石首市	高基庙镇津南村	范士云	18995846179	1	0	0	1	2	2	1	1	64	44	0	2	0	0
1081	SS01	聂峥嵘	聂峥嵘	湖北省荆州市石首市	高基庙镇津南村	吴双喜	13886627104	3	0	0	2	2	2	1	1	53	40	0	12	0	6	0	2	2	52	40	0	6	0	0
1082	SS01	聂峥嵘	聂峥嵘	湖北省荆州市石首市	高基庙镇津南村	李良富		3	0	0	2	2	2	2	2	58	38	0	9	0	0
1083	SS01	聂峥嵘	聂峥嵘	湖北省荆州市石首市	高基庙镇津南村	李阳春	13797355617	4	0	0	4	3	3	1	1	59	40	0	12	0	6		2	2	58	40	0	6	0	6
1084	XZ0114	乐诗卉	乐诗卉	湖北省襄阳市襄州区	张家集镇聂岗村	张小林	13986395121	4	0	0	2	3	2	1	1	47	27	0	9	1	0	0	2	2	45	25	0	9	0	0	0
1085	XZ0115	乐诗卉	乐诗卉	湖北省襄阳市襄州区	张家集镇聂岗村	刘笃群	13217108447	3	1	0	2	1	1	1	1	70	49	0	12	0	0	0
1086	XZ0116	乐诗卉	乐诗卉	湖北省襄阳市襄州区	张家集镇聂岗村	王志船	13197183376	10	0	2	10	6	2	1	1	53	31	0	9	1	0	0	2	2	30	6	0	6	0	0	0
1087	XZ0117	乐诗卉	乐诗卉	湖北省襄阳市襄州区	张家集镇聂岗村	张月杰	15586393638	5	1	0	5	2	2	1	1	43	20	0	7	0	0	0	2	2	44	16	0	2	0	0	0
1088	XZ0311	乐诗卉	乐诗卉	湖北省襄阳市襄州区	张家集镇官沟村	侯国章	13986339586	8	2	0	2	2	2	1	1	71	44	0	12	0	0	0	2	2	68	54	1	5	0	0	0
1089	XZ0312	乐诗卉	乐诗卉	湖北省襄阳市襄州区	张家集镇官沟村	王运成	18671012789	5	0	1	3	2	2	1	1	56	36	0	4	1	0	0	2	2	57	37	0	4	0	0	0
1090	XZ0313	乐诗卉	乐诗卉	湖北省襄阳市襄州区	张家集镇官沟村	侯永忠	15571111128	6	1	0	4	2	2	1	1	58	44	0	9	1	0	0	2	2	57	38	0	5	0	0	0
1091	XZ0314	乐诗卉	乐诗卉	湖北省襄阳市襄州区	张家集镇官沟村	李四喜	13986392965	4	0	0	2	2	2	1	1	59	42	0	11	0	0	0	2	2	58	48	0	3	0	0	0
1092	XZ0315	乐诗卉	乐诗卉	湖北省襄阳市襄州区	张家集镇官沟村	梁春凤	18927859763	4	0	0	3	2	2	1	2	55	39	0	3	0	0	0	2	1	54	38	0	6	0	0	0
1093	XZ0316	乐诗卉	乐诗卉	湖北省襄阳市襄州区	张家集镇官沟村	梁冬顺	13972279842	10	2	0	3	2	2	1	1	65	48	1	9	0	0	0	2	2	68	48	1	9	0	0	0
1094	XZ0412	乐诗卉	乐诗卉	湖北省襄阳市襄州区	峪山镇黄湾村	张仁元	18872192552	5	1	0	2	2	2	1	2	66	50	1	0	0	0	0	2	1	64	50	0	9	0	0	0
1095	XZ0413	乐诗卉	乐诗卉	湖北省襄阳市襄州区	峪山镇黄湾村	刘明笑	19972989305	2	0	0	2	2	2	1	2	64	51	1	9	0	0	0	2	1	63	50	1	9	0	0	0
1096	XZ0414	乐诗卉	乐诗卉	湖北省襄阳市襄州区	峪山镇黄湾村	黄明成	13886207440	2	0	0	2	2	2	1	1	70	50	1	6	0	0	0	2	2	74	54	0	6	0	0	0
1097	XZ0415	乐诗卉	乐诗卉	湖北省襄阳市襄州区	峪山镇黄湾村	黄明功	15271114371	5	1	0	1	3	1	1	1	72	55	0	0	0	0	0	3	1	44	20	0	9	0	0	0
1098	XZ0416	乐诗卉	乐诗卉	湖北省襄阳市襄州区	峪山镇黄湾村	黄明得	1379655461	2	1	0	2	2	2	1	1	66	52	1	2	0	0	0	2	2	64	50	0	6	0	0	0
1099	XZ0509	乐诗卉	乐诗卉	湖北省襄阳市襄州区	峪山镇毕岗村	周奇艳	19139746177	5	2	0	3	3	2	1	2	42	10	0	3	0	0	0	4	1	67	47	1	8	0	0	0
1100	XZ0510	乐诗卉	乐诗卉	湖北省襄阳市襄州区	峪山镇毕岗村	毕景	13487100649	5	0	0	2	4	2	1	2	54	40	1	8	1	0	0	2	1	54	40	1	8	0	0	0
1101	XZ0511	乐诗卉	乐诗卉	湖北省襄阳市襄州区	峪山镇毕岗村	艾明付	15172587165	4	0	0	2	4	2	1	1	64	44	0	6	0	0	0	2	2	64	48	1	0	0	0	0
1102	XZ0512	乐诗卉	乐诗卉	湖北省襄阳市襄州区	峪山镇毕岗村	毕保柱	15871062382	4	0	0	1	2	1	1	1	45	5	0	9	0	0	0
1103	XZ0610	乐诗卉	乐诗卉	湖北省襄阳市襄州区	峪山镇樊岗村	梅长巧	13687297634	4	0	0	4	2	2	1	2	42	16	0	9	0	0	0	2	1	43	17	0	9	0	0	0
1104	XZ0611	乐诗卉	乐诗卉	湖北省襄阳市襄州区	峪山镇樊岗村	胡治成	16588892508	6	0	1	3	5	2	1	2	57	40	0	0	0	0	0	2	1	60	40	1	5	0	0	0
1105	XZ0612	乐诗卉	乐诗卉	湖北省襄阳市襄州区	峪山镇樊岗村	张建业	17675736151	7	0	1	5	3	2	1	2	60	40	1	3	0	0	0	2	1	60	40	0	6	0	0	0
1106	XZ0710	乐诗卉	乐诗卉	湖北省襄阳市襄州区	双沟镇韦庄村	宋成莲	15871053479	6	0	2	2	3	2	1	2	59	47	1	9	0	0	0	2	1	58	46	0	6	0	0	0
1107	XZ0711	乐诗卉	乐诗卉	湖北省襄阳市襄州区	双沟镇韦庄村	韦龙后	13774157413	3	0	0	3	3	2	1	1	60	48	0	9	0	0	0	2	2	59	47	1	9	0	0	0
1108	XZ0712	乐诗卉	乐诗卉	湖北省襄阳市襄州区	双沟镇韦庄村	韦年华	13797747204	5	0	0	1	3	1	1	1	46	34	1	5	0	0	0	2	2	45	33	0	3	0	0	0
1109	XZ0807	乐诗卉	乐诗卉	湖北省襄阳市襄州区	双沟镇程冢村	侯明凤	15682939751	2	0	0	2	2	2	1	1	62	42	0	12	0	0	0	2	2	60	40	1	12	0	0	0
1110	XZ0808	乐诗卉	乐诗卉	湖北省襄阳市襄州区	双沟镇程冢村	韩曼	15577764371	4	1	0	4	2	2	1	2	43	31	0	9	1	0	0	2	1	46	34	1	9	0	0	0
1111	ZY0210	乐诗卉	乐诗卉	湖北省襄阳市枣阳市	兴隆镇冯岗村	时大菊	15872305273	2	2	0	2	2	2	1	2	66	54	1	6	0	0	0	2	1	66	54	1	6	0	0	0
1112	ZY0211	乐诗卉	乐诗卉	湖北省襄阳市枣阳市	兴隆镇冯岗村	罗道华	0710-6772358	3	2	0	2	2	2	1	2	66	46	1	9	0	0	0	2	1	68	48	1	9	1	0	0
1113	ZY0212	乐诗卉	乐诗卉	湖北省襄阳市枣阳市	兴隆镇冯岗村	夏泽良	13797682550	3	0	0	2	3	2	1	1	67	57	0	6	0	0	0	2	2	67	58	1	2	0	0	0
1114	ZY0213	乐诗卉	乐诗卉	湖北省襄阳市枣阳市	兴隆镇冯岗村	谢金伦	18071766276	3	0	0	2	3	2	1	1	58	46	0	6	0	12	1	2	2	57	40	0	9	0	0	0
1115	ZY0214	乐诗卉	乐诗卉	湖北省襄阳市枣阳市	兴隆镇冯岗村	张兵	13597531586	4	0	0	2	4	1	1	1	48	5	0	12	1	12	1
1116	ZY0215	乐诗卉	乐诗卉	湖北省襄阳市枣阳市	兴隆镇冯岗村	谢正华	18157932501	3	0	0	2	3	2	1	2	54	34	0	6	0	0	0	2	1	54	35	1	6	0	4	1
1117	ZY0216	乐诗卉	乐诗卉	湖北省襄阳市枣阳市	兴隆镇冯岗村	张德成	15870323531	6	0	0	4	2	2	1	1	64	48	0	0	0	0	0	2	2	58	42	1	3	0	0	0
1118	ZY0217	乐诗卉	乐诗卉	湖北省襄阳市枣阳市	兴隆镇冯岗村	何建业	15071811507	5	0	1	2	2	2	1	1	51	39	0	6	0	0	0	2	2	51	39	0	6	0	0	0
1119	ZY0302	乐诗卉	乐诗卉	湖北省襄阳市枣阳市	兴隆镇李庙村	罗立敏	15975217181	4	0	0	2	4	2	1	2	50	15	0	7	0	0	0	2	1	50	22	0	9	0	0	0
1120	ZY0419	乐诗卉	乐诗卉	湖北省襄阳市枣阳市	兴隆镇大堰村	万文才	19142036659	5	1	0	4	4	3	1	1	25	10	0	9	0	1	1	4	1	49	30	0	6	0	11	1
1121	ZY0420	乐诗卉	乐诗卉	湖北省襄阳市枣阳市	兴隆镇大堰村	曹永志	15171516753	5	1	1	4	1	1	1	1	68	50	0	0	0	0	0
1122	ZY0421	乐诗卉	乐诗卉	湖北省襄阳市枣阳市	兴隆镇大堰村	刘明军	17386639582	2	2	0	2	2	2	1	1	67	50	1	9	0	0	0	2	2	67	50	1	9	0	0	0
1123	ZY0507	乐诗卉	乐诗卉	湖北省襄阳市枣阳市	南城街道后湖村	王文英	18071815763	5	0	1	2	4	1	1	2	55	28	1	5	0	0	0
1124	ZY0508	乐诗卉	乐诗卉	湖北省襄阳市枣阳市	南城街道后湖村	李永胜	15327931844	2	2	0	2	2	2	1	1	68	52	1	9	0	12	1	2	2	68	52	1	9	0	0	0
1125	ZY0509	乐诗卉	乐诗卉	湖北省襄阳市枣阳市	南城街道后湖村	陈玉珍	15071507104	5	1	1	3	3	1	1	2	50	35	0	6	0	0	0
1126	ZY0510	乐诗卉	乐诗卉	湖北省襄阳市枣阳市	南城街道后湖村	李永成	17871636809	3	0	0	2	1	1	1	1	51	35	0	6	0	0	0
1127	ZY0511	乐诗卉	乐诗卉	湖北省襄阳市枣阳市	南城街道后湖村	李永国	189756389890	6	0	0	2	3	1	1	2	71	55	1	6	0	0	0
1128	ZY0611	乐诗卉	乐诗卉	湖北省襄阳市枣阳市	南城街道李家庄村	王启亮	15971038954	3	0	0	2	3	2	1	1	50	35	0	8	0	12	0	2	2	50	35	1	8	0	0	0
1129	ZY0612	乐诗卉	乐诗卉	湖北省襄阳市枣阳市	南城街道李家庄村	龚本安	18771523420	2	0	0	2	2	2	1	1	64	48	0	9	0	4	2	2	2	63	46	1	9	0	0	0
1130	ZY0613	乐诗卉	乐诗卉	湖北省襄阳市枣阳市	南城街道李家庄村	李家芳	15871960262	4	0	0	2	2	2	1	2	52	32	0	3	0	0	0	2	1	52	32	1	6	0	0	0
1131	ZY0712	乐诗卉	乐诗卉	湖北省襄阳市枣阳市	南城街道彭岗村	刘玉琼	13797739711	4	0	0	2	4	2	1	2	55	35	1	4	0	0	0	2	1	53	30	0	9	0	0	0
1132	ZY0713	乐诗卉	乐诗卉	湖北省襄阳市枣阳市	南城街道彭岗村	李之勇	13507270948	4	0	0	2	3	2	1	1	55	38	0	9	1	0	0	2	2	55	38	0	6	0	0	0
1133	ZY0714	乐诗卉	乐诗卉	湖北省襄阳市枣阳市	南城街道彭岗村	彭克亮	13476433988	3	0	0	2	3	2	1	1	50	28	0	16	1	12	1	2	2	50	28	0	9	0	0	0
1134	ZY0715	乐诗卉	乐诗卉	湖北省襄阳市枣阳市	南城街道彭岗村	彭灯志	15871041268	3	0	0	3	2	2	1	1	68	50	0	9	0	0	0	2	2	70	52	1	3	0	0	0
1135	ZY0807	乐诗卉	乐诗卉	湖北省襄阳市枣阳市	南城街道耿畈村	耿帮福	15172645144	3	1	0	2	3	2	1	1	66	50	1	2	0	0	0	2	2	58	40	0	0	0	0	0
1136	ZY0808	乐诗卉	乐诗卉	湖北省襄阳市枣阳市	南城街道耿畈村	耿纯群	13117212039	2	2	0	2	0	2	1	1	71	26	0	9	0	0	0	2	2	71	28	1	6	0	0	0
1137	XZ0122	宋聪聪	乐诗卉	湖北省襄阳市襄州区	张家集镇聂岗村	陆小林	13871783749	6	2	2	4	4	2	1	2	64	47	1	0	0	0	0	2	1	62	45	0	15	0	12	5
1138	XZ0123	宋聪聪	乐诗卉	湖北省襄阳市襄州区	张家集镇聂岗村	路有福	13797716704	7	2	1	7	5	2	1	1	65	49	1	9	0	0	0	2	2	63	48	0	0	0	0	0
1139	XZ0124	宋聪聪	乐诗卉	湖北省襄阳市襄州区	张家集镇聂岗村	张发	13827456951	5	0	0	3	3	2	1	1	50	32	0	9	0	0	0	2	2	46	28	0	6	0	0	0
1140	XZ0206	宋聪聪	乐诗卉	湖北省襄阳市襄州区	张家集镇李营村	李小五	13427045129	6	1	0	6	4	2	1	2	60	42	0	0	0	0	0	2	1	66	48	0	9	1	1	1
1141	XZ0207	宋聪聪	乐诗卉	湖北省襄阳市襄州区	张家集镇李营村	王守田	13728551458	2	2	0	0	2	2	1	1	70	52	0	9	1	0	0	2	2	70	52	0	0	0	0	0
1142	XZ0317	宋聪聪	乐诗卉	湖北省襄阳市襄州区	张家集镇官沟村	张爷	13348534264	4	2	0	2	3	1	1	1	71	55	0	6	0	0	0
1143	XZ0318	宋聪聪	乐诗卉	湖北省襄阳市襄州区	张家集镇官沟村	李甲儿	13348242406	5	2	0	5	4	1	1	2	70	55	0	6	0	0	0
1144	XZ0417	宋聪聪	乐诗卉	湖北省襄阳市襄州区	峪山镇黄湾村	黄克文	18271780219	2	2	0	2	2	2	1	1	78	62	0	6	0	0	0	2	2	78	62	0	0	0	0	0
1145	XZ0418	宋聪聪	乐诗卉	湖北省襄阳市襄州区	峪山镇黄湾村	黄小强	13458272945	5	0	0	2	4	2	1	1	56	43	1	4	0	0	0	2	2	56	43	1	5	0	12	4
1146	XZ0419	宋聪聪	乐诗卉	湖北省襄阳市襄州区	峪山镇黄湾村	李文芳	13414582726	3	0	0	2	3	2	1	2	55	43	0	5	0	1	4	2	1	56	44	1	3	0	1	4
1147	XZ0420	宋聪聪	乐诗卉	湖北省襄阳市襄州区	峪山镇黄湾村	黄兴田	13527263840	3	1	0	0	3	2	1	1	67	50	0	9	0	0	0	2	2	65	48	0	0	0	0	0
1148	XZ0421	宋聪聪	乐诗卉	湖北省襄阳市襄州区	峪山镇黄湾村	田阿娇	13458243729	3	0	0	2	3	2	1	2	51	34	0	9	0	0	0	2	1	57	40	1	6	0	3	3
1149	XZ0515	宋聪聪	乐诗卉	湖北省襄阳市襄州区	峪山镇毕岗村	王进	13528496950	3	0	0	3	3	2	1	1	59	43	0	9	1	0	0	2	2	60	44	0	9	0	0	0
1150	XZ0516	宋聪聪	乐诗卉	湖北省襄阳市襄州区	峪山镇毕岗村	胡加国	18371075166	4	0	0	0	2	2	1	1	53	21	0	9	0	0	0	2	2	50	21	0	9	0	0	0
1151	XZ0517	宋聪聪	乐诗卉	湖北省襄阳市襄州区	峪山镇毕岗村	程笔先	15625682729	2	2	0	2	2	2	1	1	66	46	0	9	0	12	1	2	2	67	50	0	0	0	0	0
1152	XZ0604	宋聪聪	乐诗卉	湖北省襄阳市襄州区	峪山镇樊岗村	段沛国	13487160704	3	0	0	2	1	2	1	1	60	43	0	6	0	0	0	2	2	59	42	0	0	0	0	0
1153	XZ0605	宋聪聪	乐诗卉	湖北省襄阳市襄州区	峪山镇樊岗村	马进喜	15428596752	8	0	3	5	5	5	1	1	58	43	0	9	0	0	0	2	2	56	41	0	9	0	0	0
1154	XZ0606	宋聪聪	乐诗卉	湖北省襄阳市襄州区	峪山镇樊岗村	田新生	13428596958	6	0	1	6	4	2	1	1	56	43	0	4	0	0	0	2	2	57	44	0	3	0	0	0
1155	XZ0708	宋聪聪	乐诗卉	湖北省襄阳市襄州区	双沟镇韦庄村	韦有功	15271972350	4	0	1	2	3	2	1	1	60	40	0	12	0	0	0	2	2	60	45	0	9	0	6	1
1156	XZ0709	宋聪聪	乐诗卉	湖北省襄阳市襄州区	双沟镇韦庄村	李文化	15997260961	2	0	0	2	2	2	1	1	62	52	0	0	0	0	0	2	2	55	45	0	2	0	0	0
1157	XZ0811	宋聪聪	乐诗卉	湖北省襄阳市襄州区	双沟镇程冢村	郝太书	13486385244	5	2	0	2	2	2	1	1	71	52	0	4	0	0	0	2	2	68	45	1	0	0	0	0
1158	XZ0812	宋聪聪	乐诗卉	湖北省襄阳市襄州区	双沟镇程冢村	郝安堤	13886234103	2	2	0	2	2	2	1	1	65	49	0	3	0	0	0	2	2	65	49	0	2	0	0	0
1159	XZ0813	宋聪聪	乐诗卉	湖北省襄阳市襄州区	双沟镇程冢村	韦今	13457896972	5	0	0	2	3	1	1	1	59	10	0	9	0	0	0
1160	ZY0201	宋聪聪	乐诗卉	湖北省襄阳市枣阳市	兴隆镇冯岗村	徐兴才	13487166978	5	0	0	1	3	1	1	1	58	42	0	9	1	0	0
1161	ZY0202	宋聪聪	乐诗卉	湖北省襄阳市枣阳市	兴隆镇冯岗村	张德忠	13257206528	3	0	0	2	3	3	1	1	50	27	1	6	0	0	0	2	2	50	27	1	6	0	6	1
1162	ZY0203	宋聪聪	乐诗卉	湖北省襄阳市枣阳市	兴隆镇冯岗村	陈国纯	15391582846	3	0	0	2	3	2	1	1	51	28	1	1	0	0	0	2	2	45	22	0	6	0	0	0
1163	ZY0204	宋聪聪	乐诗卉	湖北省襄阳市枣阳市	兴隆镇冯岗村	肖本科	18696234195	10	0	2	2	4	2	1	1	67	53	1	6	0	0	0	2	2	66	52	1	3	0	0	0
1164	ZY0403	宋聪聪	乐诗卉	湖北省襄阳市枣阳市	兴隆镇大堰村	谢银俊	15072296716	4	0	0	2	2	2	1	1	59	46	0	6	0	0	0	2	2	59	46	0	6	0	0	0
1165	ZY0404	宋聪聪	乐诗卉	湖北省襄阳市枣阳市	兴隆镇大堰村	谢兵	13972264180	4	0	0	2	2	2	1	1	41	29	0	9	0	0	0	2	2	42	30	0	9	0	0	0
1166	ZY0405	宋聪聪	乐诗卉	湖北省襄阳市枣阳市	兴隆镇大堰村	王们军	13871632522	8	0	1	2	6	2	1	1	59	47	0	9	0	0	0	2	2	59	47	0	12	0	0	0
1167	ZY0406	宋聪聪	乐诗卉	湖北省襄阳市枣阳市	兴隆镇大堰村	左才军	15926892445	4	0	0	3	2	2	1	1	41	29	0	6	0	0	0	2	2	42	30	0	6	0	0	0
1168	ZY0407	宋聪聪	乐诗卉	湖北省襄阳市枣阳市	兴隆镇大堰村	谢亚毅	19986252956	4	0	0	4	2	2	1	1	36	11	0	12	0	0	0	2	2	33	8	0	11	0	0	0
1169	ZY0408	宋聪聪	乐诗卉	湖北省襄阳市枣阳市	兴隆镇大堰村	张树伦	15997305322	3	0	0	2	3	2	1	1	61	41	0	12	1	0	0	2	2	63	43	0	9	0	0	0
1170	ZY0409	宋聪聪	乐诗卉	湖北省襄阳市枣阳市	兴隆镇大堰村	王明喜	15342310448	7	0	0	2	5	2	1	1	60	35	1	12	0	2	4	2	2	59	34	1	6	0	0	0
1171	ZY0410	宋聪聪	乐诗卉	湖北省襄阳市枣阳市	兴隆镇大堰村	吴家伦	15271994365	4	0	0	2	4	2	1	1	52	30	0	9	1	0	0	2	2	52	30	0	9	0	0	0
1172	ZY0504	宋聪聪	乐诗卉	湖北省襄阳市枣阳市	南城街道后湖村	李永堂	15926891523	2	2	0	2	2	2	1	1	70	54	0	6	0	0	0	2	2	70	54	0	6	0	0	0
1173	ZY0505	宋聪聪	乐诗卉	湖北省襄阳市枣阳市	南城街道后湖村	李永冬	15327931728	6	0	0	2	4	2	1	1	64	44	0	5	0	0	0	2	2	64	44	0	4	0	0	0
1174	ZY0506	宋聪聪	乐诗卉	湖北省襄阳市枣阳市	南城街道后湖村	张主任	19716637456	5	0	1	5	3	2	1	1	36	10	0	12	1	12	1	2	2	33	8	0	9	0	0	0	4	2	62	42	0	9	0	0	0
1175	ZY0605	宋聪聪	乐诗卉	湖北省襄阳市枣阳市	南城街道李家庄村	李元亮	15627274677	5	0	0	2	5	2	1	1	53	31	1	6	0	0	0	2	2	53	31	0	9	1	12	1
1176	ZY0606	宋聪聪	乐诗卉	湖北省襄阳市枣阳市	南城街道李家庄村	李家海	15967526804	6	1	1	2	4	2	1	1	65	49	0	4	0	0	0	2	2	66	50	1	9	0	0	0
1177	ZY0607	宋聪聪	乐诗卉	湖北省襄阳市枣阳市	南城街道李家庄村	王启国	15570689446	6	1	1	2	4	2	1	1	66	40	0	9	0	0	0	2	2	65	40	0	6	0	0	0
1178	ZY0608	宋聪聪	乐诗卉	湖北省襄阳市枣阳市	南城街道李家庄村	李之刚	13972294038	4	0	1	0	2	1	1	1	54	37	0	9	1	0	0
1179	ZY0609	宋聪聪	乐诗卉	湖北省襄阳市枣阳市	南城街道李家庄村	张守安	15391593532	5	0	0	2	2	2	1	1	56	41	0	9	1	0	0	2	2	56	41	0	9	0	0	0
1180	ZY0610	宋聪聪	乐诗卉	湖北省襄阳市枣阳市	南城街道李家庄村	张明才	18271780842	3	1	0	2	2	2	1	1	69	51	1	6	1	0	0	2	2	65	46	1	6	0	0	0
1181	ZY0709	宋聪聪	乐诗卉	湖北省襄阳市枣阳市	南城街道彭岗村	杜道元	0710-6252475	4	0	0	2	4	2	1	1	6	40	0	12	0	2	4	2	2	60	40	0	9	0	0	0
1182	ZY0710	宋聪聪	乐诗卉	湖北省襄阳市枣阳市	南城街道彭岗村	彭克海	17740566467	6	1	0	4	2	2	1	1	57	40	0	9	1	0	0	3	2	39	13	0	9	0	0	0
1183	ZY0711	宋聪聪	乐诗卉	湖北省襄阳市枣阳市	南城街道彭岗村	彭广金	13567262737	4	2	0	2	3	2	1	1	80	55	0	0	1	0	0	2	2	74	50	1	3	0	0	0
1184	ZY0805	宋聪聪	乐诗卉	湖北省襄阳市枣阳市	南城街道耿畈村	耿利文	13459453428	4	1	0	1	3	1	1	1	69	50	1	6	0	0	0	2	2	70	55	1	0	0	0	0
1185	ZY0806	宋聪聪	乐诗卉	湖北省襄阳市枣阳市	南城街道耿畈村	耿安现	13772842765	2	2	0	2	2	2	1	1	76	60	1	6	0	0	0	2	2	77	60	1	0	0	0	0
1186	SY0305	王建鑫	乐诗卉	湖北省荆门市沙洋县	后港镇李台村	王顺玉	13117068861	4	1	0	2	4	2	1	1	72	56	0	5	1	12	1	3	1	48	28	0	11	0	3	5
1187	SY0306	王建鑫	乐诗卉	湖北省荆门市沙洋县	后港镇李台村	刘新仿	17037056411	6	2	0	4	4	2	1	1	73	58	0	5	0	0	0	2	2	70	55	0	0	0	0	0
1188	SY0307	王建鑫	乐诗卉	湖北省荆门市沙洋县	后港镇李台村	张荣	13316528938	6	0	1	4	4	2	1	1	59	42	0	8	0	3	1	2	2	56	38	0	8	0	0	0
1189	SY0507	王建鑫	乐诗卉	湖北省荆门市沙洋县	毛李镇毛李村	毛秀清	13377991386	6	0	2	4	4	2	1	1	64	44	1	5	0	3	1	2	2	64	44	0	5	0	0	0
1190	SY0508	王建鑫	乐诗卉	湖北省荆门市沙洋县	毛李镇毛李村	张绪林	13177172889	3	0	0	2	3	2	1	1	56	36	0	8	0	6	1	2	2	52	32	1	8	0	0	0
1191	SY0509	王建鑫	乐诗卉	湖北省荆门市沙洋县	毛李镇毛李村	雷克福	13197114522	1	1	0	1	1	1	1	1	76	59	0	5	0	0	0
1192	SY0510	王建鑫	乐诗卉	湖北省荆门市沙洋县	毛李镇毛李村	李正洪	13647248809	6	0	0	1	6	1	1	1	62	42	1	11	1	0	0
1193	SY0511	王建鑫	乐诗卉	湖北省荆门市沙洋县	毛李镇毛李村	田文物	18971847621	2	0	0	2	2	2	1	1	63	43	0	11	1	0	0	2	2	62	42	0	5	0	0	0
[truncated: 332 more columns]

## Sheet: 2021村庄数据
村庄问卷基本信息								一、受访者基本信息								二、村庄基本情况
																																			村庄财政情况													村庄品牌建设情况
编号	问卷编号	调查员	录入员	省市（县）	乡（镇）村	受访者	电话	受访者身份	性别	年龄（岁）	任期年限（年）	是否患有慢性疾病	受教育年限（年）	政治面貌	是否属于本村第一大姓	1.地形	2.（1）村委距乡镇距离	（2）村委距县城距离	（3）村委距技术示范点距离	3.（1）总户数（户）	（2）总人口（人）	（3）近3年是否有人口迁出	（4）人口迁出户数（户）	4.（1）本村有多少个姓氏（个）	（2）第一大姓名称	（3）占总人口比例（%）	5.是否有宗庙祠堂	6.（1）现存农业用地总面积（亩）			7.（1）本村是否有非农集体经济	（2）是否有工厂或企业	（3）是否有养殖场	（4）是否有农村公共交通	8.（1）本村的财务收入（万元）	（2）财政支出（万元）	（3）财政主要用途									9.（1）村庄绿化覆盖率（%）	（2）绿色防控面积比例（%）	10.（1）本村是否有“一村一品”	（2）当地是否有关于水稻的区域公用品牌
编号																													（2）耕地面积（亩）	（3）林地面积（亩）							1.集体经营扩大再生产	2.为农户提供生产服务	3.村教育	4.新农合	5.农村养老保险	6.基础设施（路、桥等）	7.村干部工资和补贴	8.农村人居环境整治	9.其他
1	JS-01	杜三峡	王建鑫	湖北省荆门市京山市	雁门口镇瓦庙村	盛盼龙	18971846499	1	1	48	5	0	12	1	0	2	4	22	0	440	1815	0	0	30	陈	10	0	3593	3593	0	0	1	0	1		20	1	1	1	0	0	1	1	1		8	60	1	1
2	JS-02	杜三峡	杜三峡	湖北省荆门市京山市	雁门口镇白虎村	刘昌平	13986982587	3	1	41	20	0	15	1	0	2	6	28	0.5	341	1236	0	0	18	王	12	0	9162	4662	4500	0	0	0	1	70	70	0	0	0	0	0	1	1	1		65	40	1	1
3	JS-03	杜三峡	杜三峡	湖北省荆门市京山市	雁门口镇中南村	烨运红	15972625132	3	1	50	11	0	9	1	0	2	11	30	0	340	1284	0	0	10	黄	26	0	20005	40005	16000	0	0	1	1	10	10	0	0	0	0	0	1	0	0		60	60	0	0
4	JS-04	王建鑫	杜三峡	湖北省荆门市京山市	曹武镇顾家场村	王小刚	13997712933	5	1	39	4	0	12	1	0	2	3.5	28		315	1227	0		5	顾	50	0	3663	3663	0	1	1	1	0	10	10	0	0	0	0	0	0	1	0		40	50	0	0
5	JS-05	杜三峡	杜三峡	湖北省荆门市京山市	曹武镇九房村	王杰	13339751639	3	1	45	3	0	12	1	1	2	3	23		302	1188	0		8	王	70	0	5525	4325	1200	1	1	1	0	122	150	0	0	0	0	0	1	0	0		15	40	0	0
6	JS-06	杜三峡	杜三峡	湖北省荆门市京山市	曹武镇谷家岭村	唐成平	13581340803	3	1	46	5	0	12	1	0	2	12	36	5	273	1032	1		15	王	10	0	7112	6080	1032	0	0	1	0	5	5	0	0	0	0	0	0	0	1		70	60	0	0
7	JS-07	杜三峡	杜三峡	湖北省荆门市京山市	曹武镇民主村	顾恪国	15872940580	3	1	55	20	0	11	1	0	2	13	35	0.5	343	1285	1	1	12	田	30	0	5013	3613	1650	0	0	1	1	70	100	0	0	0	0	0	1	0	0		60		0	0
8	JS-08	杜三峡	杜三峡	湖北省荆门市京山市	石龙镇蒲圻村	张正荣	13774012785	1	1	60	10	0	12	1	0	2	15	45	0	318	1197	1		20	张	25	0	4092	3992	100	0	0	0	1	18	17	1	0	0	0	0	1	1	1		40	60	1	1
9	JS-09	王建鑫	杜三峡	湖北省荆门市京山市	石龙镇五姊山村	毕金龙	15872165333		1	20		0		1	0	2	2	50		234	908	0	0	15	曾	30	0	4700	3600	1100	1	0	1	1	7.9	7.9	0	0	0	0	0	0	1	0		10	80	1	0
10	SY-01	杜三峡	杜三峡	湖北省荆门市沙洋县	五里铺镇陈池村	陈立	13597969740	2	1	49		0		1	1	2	7	28	2	538	2399	0		26	陈	40	0	10126	8976	320	1	0	1	1	42	26	1	1	0	0	0	1	1	1		40	70	1	0
11	SY-02	杜三峡	杜三峡	湖北省荆门市沙洋县	五里铺镇赵集村	叶晓莉	15327524590	3	2	42	11	0	15	1	0	2	3.5	40	1	465	1789	1		20	赵	40	0	6100	5600	500	0	0	1	1	5.2	10	0	1	0	0	0	1	1	1		10	1	1	1
12	SY-03	杜三峡	杜三峡	湖北省荆门市沙洋县	后港镇李台村	张黎	15327491391	5	1	50	17	0	13	1	1	3	10	40	0.1	413	2108	0		15	文	10	0	6120	5400	140	1	0	0	1	2	6	0	0	0	0	0	1	0	0		20	15	1	1
13	SY-04	杜三峡	杜三峡	湖北省荆门市沙洋县	后港镇韩场村	谭绪延	15071971199	3	1	38	3	0	15	1	0	3	12	45	3	521	2134	0		18	文	21	1	6864.52	67973.5	87	0	0	1	0	18	16	0	0	0	0	0	0	1	1		10	14	0	0
14	SY-05	杜三峡	杜三峡	湖北省荆门市沙洋县	毛李镇毛李村	黄佼	18571985558	1	1	43	7	0	15	1	0	2	1	40	1	382	1480	1	12	40	朱	40	0	3500	3500		0	0	0	1	8	8	0	1	0	0	0	1	1	1		30	40	0	0
15	TF01	桑贤策	桑贤策	湖北省黄冈市团风县	总路咀镇卢家榜村	秦雪梅	15072862995	4	2	39	0	1	15	1	1	2	2	35	1	250	946	0		6	王	60	0	850	670	60	1	0	0	0	10	3.5	0	0	0	0	0	1	0	1		40	10	0	0
16	TF02	桑贤策	桑贤策	湖北省黄冈市团风县	总路咀镇双河口村	余启高	13092729178	2	1	57	3	0	6	1	1	2	2	47		430	1462	0		6	余	50	1	1200	800	100	0	0	1	0	15	10	0	0	1	0	0	1	0	0	公益性岗位	40	0	0	0
17	TF03	桑贤策	桑贤策	湖北省黄冈市团风县	马曹庙镇大路岗村	周玉安	无	1	1	56	4	0	12	1	0	2	3	23	10	184	638	0		35			0	1280	700	100	1	1	0	0	30	30	0	0	0	0	0	1	0	1	防灾	20	0	0	0
18	TF04	桑贤策	桑贤策	湖北省黄冈市团风县	马曹庙镇桥子畈村	肖继光	18607255800	1	1	41	7	0	12	1	1	2	2	20	1	205	734	0		4	肖	50	0	1300	923	200	0	0	1	0	5	5	0	0	0	0	0	1	1	0		30	10	0	0
19	TF05	桑贤策	桑贤策	湖北省黄冈市团风县	马曹庙镇沙河图村	熊润	15672608388	1	1	33	3	0	12	1	0	2	2	17	2	604	1937	0		8	卢	20	1	2100	1480	350	0	0	1	0	20	20	0	0	0	0	0	1	1	0		35	10	0	0
20	TF06	桑贤策	桑贤策	湖北省黄冈市团风县	淋山河镇孙家山村	孙华峰	15391636022	2	1	60	7	0	9	1	1	2	1	4.5	0.1	238	930	0		5	孙	80	1	560	560	0	0	0	0	0	5	5	0	0	0	0	0	0	1	0		20	5	0	0
21	XS01	桑贤策	桑贤策	湖北省黄冈市浠水县	兰溪镇盐客树村	程小文	18871303336	1	1	56	23	0	12	1	0	2	5	10	2	730	2527	1	2	3	李	60	0	5600	3600	500	1	1	1	0	15	80	0	0	0	0	0	1	1	1		25	0	0	0
22	XS02	桑贤策	桑贤策	湖北省黄冈市浠水县	兰溪镇盐三泉村	冯国民	15926798988	1	1	56	38	0	15	1	1	2	0.5	18	0.2	686	2678	1	2	6	张	30	0	2500	1650	300	0	0	0	0	25	35	0	0	0	0	0	0	1	1		30	10	0	0
23	XS03	桑贤策	桑贤策	湖北省黄冈市浠水县	清泉镇三台山村	钟楚杪	13636082403	1	1	56	25	0	9	1	0	2	8	7	0.1	526	2026	0		7	司	50	0	4300	2998	567	0	1	1	0	14.7	14.7	0	0	0	0	0	0	1	0		20	15	0	0
24	XS04	桑贤策	桑贤策	湖北省黄冈市浠水县	关口镇凉亭村	郭建峰	13607250327	1	1	49	10	0	9	1	1	2	16	25	1	245	850	0		20	郭	70	0	2500	1976	300	0	1	0	0	5	20	0	0	0	0	0	1	1	0		15	5	0	0
25	XS05	钟小淼	桑贤策	湖北省黄冈市浠水县	关口镇长流村	柴龙权	13476698389	1	1	58	13	1	12	1	0	2	4	25	1	435	1590	1	6	4	郭	50	0	1000	400	400	0	1	1	1	11	20	0	0	0	0	0	1	1	0		31	10	0	0
26	XS06	桑贤策	桑贤策	湖北省黄冈市浠水县	洗马镇河东村	叶金宝	13477646596	1	1	58	20	0	12	1	1	2	0.5	25	0.15	360	1380	0		5	何	30	1	1500	1284	0	0	0	0	0	7.6	20	0	0	0	0	0	1	1	1		20	5	0	0
27	ZY-02	孙彬涵	闫阿倩	湖北省襄阳市枣阳县	兴隆镇冯岗村	张兵	13597531586	1	1	48	4	0	12	1	0	2	12	25	2	647	1493	1	5		王		0	6500	6500	0	0	0	1	1	5	6	0	0	0	0	0	1	1	0		25	70	0	0
28	XZ-01	闫阿倩	闫阿倩	湖北省襄阳市襄州区	张家集镇聂岗村	张家帅	13725803679	1	1	46	1	0	9	1	1	3	3	30	1	347	1347	0		7	张	40	0	1200	1200	0	1	0	1	0	10	7	0	0	0	0	0	1	0	0		7	0	1	0
29	ZY-05	孙彬涵	闫阿倩	湖北省襄阳市枣阳市	南城街道后湖村	李积奎	15872201663	1	1	50	3	0	15	1	1	3	13	13	0.2	206	841	0		10	李	80	1	2700	2700	0	0	0	1	1	20	14.5	0	0	0	0	0	1	1	0		80	70	1	0
30	ZY-06	孙彬涵	闫阿倩	湖北省襄阳市枣阳市	南城街道李家庄村	李家骏	18371072306	3	1	46	4	0	15	1	1	2	16	16	0	433	15116	1	3	15	李	30	0	2816	2770.48	34	0	0	1	1	22	18	0	0	0	0	0	1	1	0		90	90	0	0
31	XZ-05	李雨柯	闫阿倩	湖北省襄阳市襄州区	峪山镇毕岗村	毕志军	13476350871	1	1	53	3	0	10	1	1	2	1	40	1	361	1308	0		10	毕	60	0	2030	2030	18	0	1	0	0	5	360	0	1	1	0	1	1	0	0		20	50	1	1
32	ZY-04	李雨柯	闫阿倩	湖北省襄阳市枣阳市	兴隆镇大堰村	李立林	18727003650	5	1	37	3	0	9	1	1	2	7.8	45	0.05	276	848	1	16	12	李	60	0	6300	6060	240	1	0	1	0	3	9.4	1	1	0	0	0	0	0	0		40	0	0	0
33	ZY-06	李雨柯	闫阿倩	湖北省襄阳市枣阳市	张家集镇官沟村	梁腊顺	13581417051	5	2	31	1.5	0	14	3	1	3	1.5	30	60	26	260	1	2	3	梁	70	0	280	280	0	0	1	1	0	36	18	1	1	1	1	1	1	1	1		15	80	0	0
34	ZY-01	闫阿倩	闫阿倩	湖北省襄阳市枣阳市	兴隆镇灵庙村	谢远义	13986372809	1	1	55	3	0	12	1	1	2	7	20	0	480	2190	0		37	谢	10	0	6400	6400	0	0	0	1	0	6	7	0	0	0	0	0	1	0	0	0	0.8	0	1	0
35	XZ-04	闫阿倩	闫阿倩	湖北省襄阳市枣阳市	峪山镇黄湾村	黄建新	13581420034	5	1	42	3	1	9	1	1	3	6	30	0	208	1130	0		7	黄	35	0	4550.41	2856	120	1	1	1	0	10	12	0	0	0	0	0	1	0	1		20	0	0	1
36	XT001	唐林	唐林	湖北省仙桃市	张沟镇中心村	唐从华	无	1	1	56	15	0	12	1	0	3	3	10	0	250	1100	1	3	11	张	18	0	2153	2153	0	0	0	0	1	0	0	0	0	0	0	0	0	0	0	0	100	30	0	1
37	XT002	余威震	唐林	湖北省仙桃市	张沟镇朱坊村	朱厚海	13593916192	1	1	56	11	0	12	1	0	3	3	15	1.5	455	2072	1	5	5	朱	33.3	1	4500	1900	0	0	0	0	0	20	5	1	0	0	0	0	0	0	1		15	5	1	0
38	XT003	唐林	唐林	湖北省仙桃市	张沟镇前丰村	陈国顺	无	2	1	59	3	0	11	1	1	3	3	40	10	450	1800	0		11	陈	30	0	4800	4800	0	0	0	0	0	0	0	0	0	0	0	0	0	0	0	0	10	20	0	0
39	XT004	余威震	唐林	湖北省仙桃市	彭场镇木兰村	陈美凤	15629279129	4	2	36	5	0	9	1	0	3	7.5	3	4	311	1385	1	40	8	陈	20	0	2253	1803	450	0	1	1	0	0	0	0	0	0	0	0	0	0	0	0	10	60	0	0
40	XT005	唐林	唐林	湖北省仙桃市	彭场镇七里村	戈红运	15826934854	2	1	52	10	0	9	2	0	3	7	13	13	150	1000	1	200	8	周	15	0	1500	1500	0	0	0	0	1	0	0	0	0	0	0	0	0	0	0	0	80	30	0	0
41	XT006	唐林	唐林	湖北省仙桃市	毛嘴镇秦杨村	秦新军	无	2	1	49	4	0	9	1	1	3	2	40	0	735	3075	0		10	秦	65	0	2680	2680	0	1	0	0	1	12	12	0	0	0	0	0	0	0	1	0	6	30	0	0
42	QJ007	唐林	唐林	湖北省潜江市	老新镇三桥村	陈红	无	1	2	48	3	0	9	1	0	3	9	40	10	588	2446	0		8	陈	20	0	6627	6627	0	0	0	1	0	0	0	0	0	0	0	0	0	0	0	0	21	30	0	1
43	QJ008	唐林	唐林	湖北省潜江市	老新镇赤生存	刘生贵	无	5	1	41	2	0	9	1	1	3	2	40	5	480	2300	1	30	12	刘	33	0	5600	5600	0	0	0	1	1	0	0	0	0	0	0	0	0	0	0	0	5	20	0	1
44	QJ009	唐林	唐林	湖北省潜江市	龙湾镇沱口村	华壮逍	无	5	1	62	12	0	12	1	0	3	6	45	1	520	2600	1	60	6	肖	20	0	3600	3600	0	1	0	1	0	50	50	0	0	0	0	1	0	0	0	0	10	0	0	1
45	QJ010	唐林	唐林	湖北省潜江市	龙湾镇郑家湖村	徐艮安	无	4	2	49	3	0	9	3	1	3	3	60	3	458	2630	1	10	10	徐	15	0	6530	6530	0	0	0	1	0	20	20	0	0	0	0	0	0	0	1	0	10	30	0	1
46	QJ011	唐林	唐林	湖北省潜江市	积玉口镇积玉村	李林峰	无	1	1	44	7	0	16	1	0	3	1	50	10	259	1192	0		50	张	40	0	1332	1332	0	1	1	0	1	100	100	0	0	0	0	0	1	0	1	0	90	30	1	1
47	QJ012	唐林	唐林	湖北省潜江市	积玉口镇直属村	周中丰	无	1	1	44	4	0	16	1	0	3	10	40	5	208	1070	1	20	20	张	10	0	2094	2094	0	1	1	0	0	150	150	0	0	0	0	1	1	0	1	0	30	30	0	0
48	QJ013	黄焕怡	唐林	湖北省潜江市	浩口镇莲子垸村	王凡	13477428794	1	1	51	3	0	12	1	0	3	12.5	40	12.5	224	1050	0		10	李	30	1	5800	5800	0	0	0	1	0	4.9	7.5	0	0	0	1	1	0	1	0	0	10	30	0	0
49	QJ014	唐林	唐林	湖北省潜江市	浩口镇观音村	罗永浩	无	1	1	51	4	0	12	1	1	3	20	60	10	300	1450	0		20	罗	10	0	6000	6000	0	0	0	0	1	0	0	0	0	0	0	0	0	0	0	0	20	20	0	0
50	SS05	黄炎忠	黄炎忠	湖北省荆州市石首市	团山寺镇曹家场村	苏述发	无	2	1	49	5	0	9	1	0	2	1.5	1	无	748	3700	0	0	2	郑	35	0	6020	5847	0	1	0	1	0	25	30	0	0	0	0	0	1	0	0	0	100	10	1	1
51	SS03	黄炎忠	黄炎忠	湖北省荆州市石首市	团山寺镇过脉岭村	孙朝阳	无	1	1	51	4	0	15	1	0	2	1.5	11	0	663	2217	1	5	4	刘	20	0	5400	5000	400	1	0	1	1	30	45	0	0	0	0	0	1	0	0	0	90	100	1	1
52	JL01	黄炎忠	黄炎忠	湖北省荆州市监利市	网市镇北口社区	陈辉祥	无	1	1	63	5	0	9	1	0	3	1.5	2	无	780	3600	1	45	3	李	40	0	5900	4500	0	0	0	0	0	40	40	0	0	0	0	0	1	0	1	日常维护	70	50	0	0
53	JL02	黄炎忠	黄炎忠	湖北省荆州市监利市	网市镇万佛寺村	韩高虎	无	1	1	54	3	0	12	1	1	3	3.5	50	0	870	4500	1	10	3	李	50	0	7700	5400	0	1	1	0	0	30	30	0	0	0	0	0	1	0	0	0	80	60	0	0
54	JL04	黄炎忠	黄炎忠	湖北省荆州市监利市	毛市镇老河村	任家斌	13377901208	1	1	46	3	0	12	1	0	3	3	11	0	492	2000	1	20	2	冉	80	1	3600	2800	0	0	0	0	1	145	145	0	1	0	0	0	1	1	0	0	70	0	0	0
55	JL05	黄炎忠	黄炎忠	湖北省荆州市监利市	毛市镇杨湾村	曹必章	无	2	1	50	3	0	15	1	1	3	5	11	0	700	2800	1	10	3	曹	45	0	5600	5000		0	1	1	0	120	140	0	1	1	0	1	1	1	1	0	80	50	0	0
56	SS01	黄炎忠	黄炎忠	湖北省荆州市石首市	高基庙镇津南村	徐鹏飞	无	1	1	40	3	0	16	1	0	2	5	15	10	1006	4288	1		4	刘	30	0	9778	8218	1560	1	1	1	1	20	30	0	0	0	0	0	1	0	0	0	100	10	0	0
57	SS02	黄炎忠	黄炎忠	湖北省荆州市石首市	高基庙镇百子庵村	王镕宇	无	1	1	50	6	0	12	1	0	2	4	15	0	701	2654	1	3	6	涂	20	0	4405	4405	0	1	1	1	1	50	50	0	0	0	0	0	1	0	0	0	100	100	1	1
58	JL-03	聂峥嵘	聂峥嵘	湖北省荆州市监利县	毛市镇崔吴村	吴学兵	15272592895	3	1	60	4	0	12	1	1	3	2	20	1	505	2456	0		10	吴	55	1	3370	3370	0	0	0	0	1	1.2	21	0	0	0	0	0	0	1	0		50	10	0	0
59	SS-04	聂峥嵘	聂峥嵘	湖北省荆州市石首县	团山镇长安村	彭松林	13972102698	1	1	59	10	0	15	1	0	3	1.5	30	0.01	723	2320	0		70	郑、王	30	0	4450	3200	1100	0	0	1	1	20	40	1	1	0	0	0	1	1	1		38	100	1	1
[truncated: 104 more columns]

## Sheet: Sheet1
								1	0
								1	0
								1	0
								1	0
								1	0
								1	0
								1	0
								0	1
								1	0
								0	1
								1	0
								1	0
								0	1
								1	0
								1	0
								1	0
								0	0
								1	0
								0	0
								0	1
								0	1
								1	1
								1	0
								1	0
								1	0
								1	0
								1	0
								1	0
								1	0
								0	1
								0	1
								1	0
								1	0
								1	0
								1	0
								1	0
								1	1
								0	1
								1	0
								0	1
								0	1
								0	1
								1	0
								1	0
								0	1
								0	1
								0	1
								0	1
								0	1
								0	1
								0	1
								0	1
								0	1
								0	1
								0	1
								1	1
								1	1
								0	1
								1	0
								1	1
								1	1
								1	1
								1	1
								0	1
								0	1
								0	1
								1	0
								1	0
								1	0
								1	0
								0	1
								0	1
								0	1
								0	1
								1	1
								0	1
								0	1
								1	0
								0	1
								1	0
								1	1
								1	1
								1	1
								1	1
								1	1
								1	1
								0	1
								1	1
								0	1
								1	1
								0	0
								1	1
								1	1
								0	1
								1	1
								1	1
								1	1
								1	1
								1	1
								0	1
								1	1
								1	1
								0	1
								1	1
								1	1
								1	1
								1	1
								0	1
								0	1
								1	1
								1	1
								1	1
								0	1
								1	1
								1	1
								1	1
								1	1
								1	1
								1	1
								1	1
								1	1
								1	1
								1	1
								1	1
								0	1
								1	1
								0	1
								1	0
								1	1
								1	0
								1	0
								1	0
								1	0
								1	1
								1	1
								1	1
								1	0
								0	1
								0	1
								0	1
								0	1
								0	1
								1	1
								1	1
								1	1
								1	1
								1	1
								1	1
								1	1
								1	1
								1	1
								0	1
								1	1
								1	1
								1	1
								1	1
								1	1
								1	1
								1	1
								1	1
								1	1
								1	0
								1	1
								1	1
								1	0
								0	1
								1	0
								0	1
								1	1
								1	1
								1	1
								1	1
								1	1
								1	0
								1	0
								1	0
								1	1
								1	0
								1	1
								1	0
								1	1
								1	1
								0	1
								0	1
								0	1
								1	1
								0	1
								0	1
								0	1
								0	1
								0	1
								1	0
								1	0
								0	1
								0	1
								0	1
								0	1
								0	1
								0	1
								0	1
								0	1
								0	1
								0	1
								0	1
								0	1
								0	1
								0	1
								0	1
								0	1
								0	1
								1	1
								0	1
								0	1
								1	0
								1	1
								0	0
								0	0
								0	0
								1	1
								0	0
								0	0
								0	0
								0	1
								1	1
								0	1
								0	1
								0	1
								1	1
								0	1
								1	1
								1	1
								1	0
								0	1
								1	1
								0	1
								1	1
								0	0
								0	0
								1	1
								1	0
								1	0
								1	0
								1	1
								1	0
								1	0
								1	0
								1	0
								1	0
								1	0
								1	0
								1	1
								1	1
								1	1
								1	1
								0	1
								1	0
								1	1
								0	1
								1	1
								1	1
								1	1
								1	1
								1	1
								1	1
								1	1
								1	1
								1	1
								1	1
								1	1
								1	1
								1	1
								1	1
								1	1
								1	1
								1	1
								1	1
								1	1
								1	1
								1	0
								0	0
								1	0
								0	1
								1	0
								1	1
								1	1
								1	0
								1	0
								1	0
								1	1
								1	1
								1	0
								1	1
								1	1
								1	1
								1	1
								1	1
								1	1
								1	1
								1	1
								1	1
								1	1
								1	1
								1	1
								1	0
								1	0
								1	0
								1	1
								1	1
								0	1
								1	1
								1	1
								1	1
								1	1
								0	1
								0	1
								1	1
								1	1
								1	0
								1	1
								1	1
								1	1
								1	1
								1	1
								1	0
								1	1
								1	0
								1	1
								0	1
								0	1
								0	1
								1	1
								1	1
								1	1
								1	1
								1	1
								1	1
								1	1
								1	1
								1	1
								1	1
								1	1
								1	1
								1	1
								1	1
								1	1
								1	1
								1	1
								1	1
								1	1
								1	1
								1	1
								1	1
								1	1
								1	1
								1	1
								1	1
								1	1
								1	1
								1	1
								1	1
								1	1
								1	1
								1	1
								1	1
								1	1
								1	1
								1	1
								1	1
								1	1
								1	1
								1	1
								1	1
								1	1
								1	1
								1	1
								1	1
								1	1
								1	1
								1	1
								1	1
								1	1
								1	1
								1	1
								1	1
								1	1
								1	1
								1	1
								1	1
								1	1
								1	1
								1	1
								1	1
								1	1
								1	1
								1	1
								1	1
								1	1
								1	1
								1	1
								1	1
								1	1
								1	1
								1	1
								1	1
								1	1
								1	1
								1	1
								1	1
								1	1
								1	1
								1	1
								1	1
								1	1
								1	0
								1	0
								1	0
								0	1
								1	0
								1	1
								1	0
								1	1
								1	1
								1	1
								1	1
								1	1
								1	1
								1	1
								1	1
								1	1
								1	1
								1	1
								1	1
								1	0
								1	0
								1	0
								1	0
								1	1
								1	0
								1	1
								1	1
								1	1
								0	1
								1	1
								1	0
								0	1
								0	1
								0	1
								0	1
								0	1
								0	1
								1	0
								0	1
								1	1
								0	1
								1	0
								0	1
								0	1
								0	0
								0	1
								0	1
								0	1
								0	1
								0	1
								0	1
								0	1
								0	1
								0	1
								0	1
								0	1
								0	1
								0	1
								0	1
								0	1
								0	1
								1	1
								0	1
								0	1
								0	1
								0	1
								0	1
								0	1
								0	1
								1	0
								0	1
								0	1
								1	1
								1	1
								1	1
								1	1
								0	1
								0	1
								1	1
								1	1
								0	1
								0	1
								0	1
								0	1
								0	1
								0	1
								0	1
								0	1
								0	1
								0	1
								0	1
								1	1
								0	1
								0	1
								0	1
								1	0
								1	0
								1	1
								1	1
								1	1
								1	1
								1	0
								0	1
								1	0
								0	1
								0	1
								0	1
								0	1
								0	1
								0	1
								0	1
								0	1
								0	1
								0	1
								0	1
								0	1
								0	1
								0	1
								0	1
								0	1
								0	1
								0	1
								0	1
								0	1
								0	1
								0	1
								0	1
								0	1
								0	1
								0	1
								0	1
								1	1
								1	1
								0	1
								0	1
								0	1
								1	1
								0	1
								1	1
								0	1
								1	1
								0	1
								1	1
								1	1
								1	1
								1	1
								0	1
								1	0
								1	1
								0	1
								1	1
								1	1
								1	1
								1	1
								1	1
								1	1
								1	1
								1	1
								1	1
								1	1
								1	1
								1	1
								1	0
								1	0
								1	1
								1	0
								1	1
								1	1
								1	1
								1	1
								1	1
								1	1
								1	1
								1	1
								1	1
								1	1
								1	1
								1	1
								1	1
								1	1
								1	1
								0	1
								1	1
								1	1
								1	1
								1	1
								1	1
								1	1
								1	1
								1	1
								1	1
								1	1
								1	1
								1	1
								1	1
								1	0
								1	1
								1	1
								1	1
								1	1
								1	1
								1	1
								1	1
								1	1
								1	1
								1	1
								1	1
								1	0
								0	1
								1	1
								1	1
								1	1
								1	1
								1	1
								1	1
								1	1
								1	1
								1	1
								1	1
								1	1
								1	1
								1	1
								1	1
								1	1
								0	1
								0	1
								1	1
								1	1
								1	1
								1	1
								1	1
								1	0
								1	1
								1	0
								1	0
								1	1
								1	1
								1	1
								1	1
								1	1
								1	0
								1	0
								1	0
								1	0
								1	0
								1	1
								1	0
								1	0
								1	0
								1	0
								1	0
								1	1
								0	1
								0	1
								1	0
								0	1
								1	1
								1	1
								1	1
								1	0
								1	0
								1	1
								0	1
								1	1
								0	1
								1	1
								0	1
								1	0
								1	1
								1	1
								1	1
								1	1
								1	1
								1	1
								0	1
								1	1
								1	1
								1	1
								1	1
								1	1
								1	1
								1	1
								1	1
								1	1
								1	1
								1	1
								1	1
								1	1
								1	1
								1	0
								1	1
								0	1
								1	1
								1	1
								1	1
								1	1
								1	1
								1	1
								1	1
								0	1
								0	1
								1	1
								1	1
								1	1
								1	1
								1	1
								1	1
								1	1
								1	1
								1	1
								1	1
								1	1
								1	1
								0	1
								1	1
								0	1
								0	1
								0	1
								1	1
								0	1
								0	1
								1	1
								0	1
								1	1
								1	1
								0	1
								0	1
								1	1
								1	1
								1	1
								1	1
								1	1
								1	1
								1	1
								1	1
								1	1
								1	1
								1	1
								1	1
								1	1
								1	1
								1	1
								1	1
								1	1
								1	1
								1	1
								1	1
								1	1
								1	1
								1	1
								1	1
								1	1
								1	1
								1	1
								1	1
								1	1
								1	1
								1	1
								1	1
								1	1
								1	1
								1	1
								1	1
								0	1
								0	1
								1	0
								1	0
								0	1
								0	1
								0	1
								0	1
								0	1
								0	1
								0	1
								0	1
								0	1
								0	1
								0	1
								0	1
								0	1
								0	1
								0	1
								0	1
								0	1
								0	1
								0	1
								1	1
								0	1
								0	1
								0	1
								0	1
								0	1
								0	1
								0	1
								0	1
								0	1
								0	1
								0	1
								0	1
								0	1
								1	0
								0	1
								0	1
								0	1
								0	1
								0	1
								0	1
								1	0
								0	1
								0	1
								1	1
								1	1
								1	0
								1	0
								1	0
								1	0
								1	0
								0	1
								0	1
								0	1
								1	1
								1	1
								1	1
								1	1
								1	1
								1	1
								1	1
								1	0
								1	1
								1	1
								0	1
								0	1
								1	1
								1	1
								1	1
								1	1
								1	1
								1	0
								0	1
								0	1
								1	1
								1	1
								1	0
								0	1
								1	0
								0	1
								0	1
								1	0
								0	1
								0	1
								0	1
								0	0
								0	1
								0	1
								0	1
								1	0
								0	1
								1	1
								1	1
								0	1
								0	1
								1	0
								0	1
								1	1
								1	0
								1	0
								1	1
								0	1
								1	1
								1	1
								1	0
								0	1
								1	1
								0	1
								0	1
								0	1
								0	1
								0	1
								1	1
								1	1
								1	1
								1	1
								0	1
								1	1
								1	1
								1	1
								0	1
								0	1
								1	1
								1	0
								1	1
								0	1
								0	1
								0	1
								0	1
								0	1
								0	1
								0	1
								0	1
								0	1
								1	1
								1	1
								0	1
								0	1
								0	1
								0	1
								0	1
								0	1
								0	1
								0	1
								1	1
								1	1
								0	1
								1	1
								1	1
								1	1
								0	1
								1	1
								0	1
								1	1
								0	1
								0	1
								1	1
								0	1
								0	1
								0	1
								0	1
								0	1
								0	1
								0	1
								0	1
								0	1
								0	1
								0	1
								0	1
								0	1
								0	1
								1	1
								1	1
								1	1
								1	1
								1	1
								1	1
								1	1
								1	1
								1	1
								1	1
								0	1
								1	1
								0	0
								0	0
								1	1
								1	1
								1	1
								1	1
								0	1
								1	1
								1	1
								1	0
								1	0
								1	0
								1	0
								1	0
								1	0
								1	0
								1	0
								1	0
								1	0
								1	0
								1	1
								1	0
								1	1
								1	1
								1	1
								1	1
								1	1
								1	1
								1	1
								1	1
								1	1
								0	0
								1	1
								1	1
								1	1
								1	1
								1	1
								1	1
								1	1
								1	1
								1	1
								1	1
								1	1
								1	1
								1	1
								1	1
								1	1
								1	1
								1	1
								1	1
								1	1
								1	1
								1	0
								1	0
								1	0
								0	1
								1	0
								0	0
								1	0
								1	0
								1	0
								1	0
								1	0
								0	1
								1	0
								1	0
								1	0
								1	0
								0	1
								1	0
								1	0
								0	1
								1	0
								0	1
								0	1
								1	0
								1	0
								1	0
								1	1
								1	0
								1	1
								0	1
								1	0
								1	1
								1	1
								1	1
								1	1
								1	1
								1	1
								1	1
								1	1
								1	1
								1	1
								1	1
								1	1
								1	1
								1	1
								1	1
								1	1
								1	1
								1	1
								1	1
								1	1
								1	1
								1	1
								1	1
								1	1
								0	1
								0	0
								0	0
								0	1
								0	0
								1	0
								1	1
								1	1
								1	0
								1	0
								1	1
								1	1
								1	1
								1	1
								1	0
								1	1
								1	1
								1	1
								1	1
								1	1
								1	1
								1	1
								1	1
								1	1
								1	1
								1	1
								1	1
								1	1
								1	1
								1	1
								1	1
								1	1
								1	1
								1	1
								1	1
								1	1
								1	1
								1	1
								1	1
								1	1
								1	1
								0	1
								1	1
								1	1
								1	1
								1	1
								1	1
								1	1
								1	1
								1	1
								1	1
								1	1
								1	1
								1	1
								1	1
								1	1
								1	1
								1	1
								1	1
								1	1
								1	1
								1	1
								1	1
								1	1
								1	1
								1	1
								1	1
								1	1
								1	1
								1	1
								1	1
								1	1
								1	1
								1	1
								1	1
								1	1
								1	1
								1	1
								1	1
								1	1
								1	1
								1	1
								1	1
								1	1
								1	1
								1	1
								1	1
								1	1
								1	1
								1	1
								1	1
								1	1
								1	1
								1	1
								1	1
								1	1
								1	1
								1	1
								1	1
								1	1
								1	1
								1	1
								1	1
								1	1
								1	1
								1	1
								1	1
								1	1
								1	1
								1	1
								1	1
								1	1
								1	1
								1	1
								1	1
								1	1
								1	1
								1	1
								1	1
								1	1
								1	1
								1	1
								0	1
								1	1

## Sheet: Sheet2
						年龄（岁）	受教育年限（年）
						48	12
						41	15
						50	9
						39	12
						45	12
						46	12
						55	11
						60	12
						20
						49
						42	15
						50	13
						38	15
						43	15
						39	15
						57	6
						56	12
						41	12
						33	12
						60	9
						56	12
						56	15
						56	9
						49	9
						58	12
						58	12
						48	12
						46	9
						50	15
						46	15
						53	10
						37	9
						31	14
						55	12
						42	9
						56	12
						56	12
						59	11
						36	9
						52	9
						49	9
						48	9
						41	9
						62	12
						49	9
						44	16
						44	16
						51	12
						51	12
						49	9
						51	15
						63	9
						54	12
						46	12
						50	15
						40	16
						50	12
						60	12
						59	15
